# Supplementary material for: Transitional Care Interventions From Hospital to Community to Reduce Health Care Use and Improve Patient Outcomes: A Systematic Review and Network Meta-Analysis
Source: PubMed Central journal article supplement (PMC10690480; doi:10.1001/jamanetworkopen.2023.44825), 2023-11-30
Supplement: jamanetwopen-e2344825-s001.pdf [file jamanetwopen-e2344825-s001.pdf]

## Supplemental Online Content

Tyler N, Hodkinson A, Planner C, et al. Transitional care interventions from hospital to community to reduce health care use and improve patient outcomes. *JAMA Netw Open*. 2023;6(11):e2344825. doi:10.1001/jamanetworkopen.2023.44825

**eAppendix 1.** Search Criteria

**eAppendix 2.** League Table of Head-to-Head Comparisons

**eAppendix 3.** Characteristics of Included Studies

**eAppendix 4.** Risk of Bias Assessment

**eAppendix 5.** Inconsistency Analysis

**eAppendix 6.** Publication Bias and Funnel Plots

**eAppendix 7.** Meta-Regressions

**eAppendix 8.** Sensitivity Analysis

**eAppendix 9.** Readmissions and Secondary Outcomes

This supplemental material has been provided by the authors to give readers additional information about their work.

## Appendix 1: Search Criteria

### Embase <1976 to 2022 Week 24>

|    |                                                                                                                                                                                                                                                              |         |
|----|--------------------------------------------------------------------------------------------------------------------------------------------------------------------------------------------------------------------------------------------------------------|---------|
| 1  | (discharge and (plan* or service? or program* or intervention?)).ti.                                                                                                                                                                                         | 3491    |
| 2  | *Patient Discharge/                                                                                                                                                                                                                                          | 12544   |
| 3  | (patient* adj2 discharge*).ti,ab.                                                                                                                                                                                                                            | 79339   |
| 4  | (hospital adj2 discharge*).ti,ab.                                                                                                                                                                                                                            | 66005   |
| 5  | (discharge adj2 plan*).ti,ab.                                                                                                                                                                                                                                | 6903    |
| 6  | (discharge adj service?).ti,ab.                                                                                                                                                                                                                              | 325     |
| 7  | (discharge adj program*).ti,ab.                                                                                                                                                                                                                              | 363     |
| 8  | (discharge adj procedure*).ti,ab.                                                                                                                                                                                                                            | 211     |
| 9  | 2 or 3 or 4 or 5 or 6 or 7 or 8                                                                                                                                                                                                                              | 146297  |
| 10 | Length of Stay/                                                                                                                                                                                                                                              | 229440  |
| 11 | Patient Readmission/                                                                                                                                                                                                                                         | 70908   |
| 12 | (readmission or readmitted or re-admission or re-admitted).ti,ab.                                                                                                                                                                                            | 64142   |
| 13 | (rehospitali?ation* or re-hospitali?ation* or rehospitali?ed or re-hospitali?ed).ti,ab.                                                                                                                                                                      | 16183   |
| 14 | length of stay.ti,ab.                                                                                                                                                                                                                                        | 128404  |
| 15 | length of hospital stay.ti,ab.                                                                                                                                                                                                                               | 43130   |
| 16 | ((hospital or hospitali?ed or bed) adj2 days).ti,ab.                                                                                                                                                                                                         | 23923   |
| 17 | Continuity of Patient Care/                                                                                                                                                                                                                                  | 291167  |
| 18 | 10 or 11 or 12 or 13 or 14 or 15 or 16 or 17                                                                                                                                                                                                                 | 632980  |
| 19 | 9 and 18                                                                                                                                                                                                                                                     | 37190   |
| 20 | 1 or 19                                                                                                                                                                                                                                                      | 39538   |
| 21 | (random* or factorial* or crossover* or cross over* or cross-over* or placebo* or (doubl* adj blind*) or (singl* adj blind*) or assign* or allocat* or volunteer*).ti,ab. crossover-procedure/ or double-blind procedure/ or randomized controlled trial/ or | 2173756 |
| 22 | single-blind procedure/                                                                                                                                                                                                                                      | 771038  |
| 23 | 21 or 22                                                                                                                                                                                                                                                     | 2281522 |
| 24 | nonhuman/                                                                                                                                                                                                                                                    | 6826093 |
| 25 | 23 not 24                                                                                                                                                                                                                                                    | 2031840 |
| 26 | 20 and 25                                                                                                                                                                                                                                                    | 4105    |

### Ovid MEDLINE(R) <1946 to March Week 24 2021>

|   |                                                                      |       |
|---|----------------------------------------------------------------------|-------|
| 1 | (discharge and (plan* or service? or program* or intervention?)).ti. | 2353  |
| 2 | *Patient Discharge/                                                  | 15771 |
| 3 | (patient* adj2 discharge*).ti,ab.                                    | 34481 |
| 4 | (hospital adj2 discharge*).ti,ab.                                    | 37347 |
| 5 | (discharge adj2 plan*).ti,ab.                                        | 4233  |
| 6 | (discharge adj service?).ti,ab.                                      | 151   |
| 7 | (discharge adj program*).ti,ab.                                      | 207   |
| 8 | (discharge adj procedure*).ti,ab.                                    | 133   |

|    |                                                                                                                                          |         |
|----|------------------------------------------------------------------------------------------------------------------------------------------|---------|
| 9  | 2 or 3 or 4 or 5 or 6 or 7 or 8                                                                                                          | 78357   |
| 10 | Length of Stay/                                                                                                                          | 98678   |
| 11 | Patient Readmission/                                                                                                                     | 21189   |
| 12 | (readmission or readmitted or re-admission or re-admitted).ti,ab.<br>(rehospitali?ation* or re-hospitali?ation* or rehospitali?ed or re- | 28774   |
| 13 | hospitali?ed).ti,ab.                                                                                                                     | 7848    |
| 14 | length of stay.ti,ab.                                                                                                                    | 58904   |
| 15 | length of hospital stay.ti,ab.                                                                                                           | 22985   |
| 16 | ((hospital or hospitali?ed or bed) adj2 days).ti,ab.                                                                                     | 12237   |
| 17 | Continuity of Patient Care/                                                                                                              | 20287   |
| 18 | 10 or 11 or 12 or 13 or 14 or 15 or 16 or 17                                                                                             | 193616  |
| 19 | 9 and 18                                                                                                                                 | 19573   |
| 20 | 1 or 19                                                                                                                                  | 21146   |
| 21 | randomized controlled trial.pt.                                                                                                          | 561377  |
| 22 | controlled clinical trial.pt.                                                                                                            | 94722   |
| 23 | randomized.ab.                                                                                                                           | 486697  |
| 24 | placebo.ab.                                                                                                                              | 207481  |
| 25 | drug therapy.fs.                                                                                                                         | 2458666 |
| 26 | randomly.ab.                                                                                                                             | 322856  |
| 27 | trial.ab.                                                                                                                                | 517730  |
| 28 | groups.ab.                                                                                                                               | 1999563 |
| 29 | 21 or 22 or 23 or 24 or 25 or 26 or 27 or 28                                                                                             | 4860317 |
| 30 | exp animals/ not humans.sh.                                                                                                              | 4974687 |
| 31 | 29 not 30                                                                                                                                | 4173167 |
| 32 | 20 and 31                                                                                                                                | 6266    |

APA PsycInfo <1806 to March Week 24 2021>

|    |                                                                                                                                          |      |
|----|------------------------------------------------------------------------------------------------------------------------------------------|------|
| 1  | (discharge and (plan* or service? or program* or intervention?)).ti.                                                                     | 470  |
| 2  | Discharge Planning/                                                                                                                      | 506  |
| 3  | *Hospital Discharge/                                                                                                                     | 2021 |
| 4  | (patient* adj2 discharge*).ti,ab.                                                                                                        | 3795 |
| 5  | (hospital adj2 discharge*).ti,ab.                                                                                                        | 4351 |
| 6  | (discharge adj2 plan*).ti,ab.                                                                                                            | 1320 |
| 7  | (discharge adj service?).ti,ab.                                                                                                          | 55   |
| 8  | (discharge adj program*).ti,ab.                                                                                                          | 37   |
| 9  | (discharge adj procedure*).ti,ab.                                                                                                        | 38   |
| 10 | 2 or 3 or 4 or 5 or 6 or 7 or 8 or 9                                                                                                     | 9618 |
| 11 | Length of Stay/                                                                                                                          | 4396 |
| 12 | Psychiatric Hospital Readmission/                                                                                                        | 1043 |
| 13 | (readmission or readmitted or re-admission or re-admitted).ti,ab.<br>(rehospitali?ation* or re-hospitali?ation* or rehospitali?ed or re- | 3273 |
| 14 | hospitali?ed).ti,ab.                                                                                                                     | 2095 |
| 15 | length of stay.ti,ab.                                                                                                                    | 5579 |

|    |                                                      |         |
|----|------------------------------------------------------|---------|
| 16 | length of hospital stay.ti,ab.                       | 982     |
| 17 | ((hospital or hospitali?ed or bed) adj2 days).ti,ab. | 1361    |
| 18 | (placebo* or random*).tw. or exp treatment/          | 1276732 |
| 19 | 11 or 12 or 13 or 14 or 15 or 16 or 17               | 15170   |
| 20 | 10 and 19                                            | 1719    |
| 21 | 1 or 20                                              | 2106    |
| 22 | 18 and 21                                            | 1912    |

EBM Reviews - Cochrane Central Register of Controlled Trials <September 2021>

EBM Reviews - Cochrane Database of Systematic Reviews <2005 to September 30, 2021>

|    |                                                                                                                                          |       |
|----|------------------------------------------------------------------------------------------------------------------------------------------|-------|
| 1  | (discharge and (plan* or service? or program* or intervention?)).ti.                                                                     | 601   |
| 2  | Patient Discharge/                                                                                                                       | 1723  |
| 3  | (patient* adj2 discharge*).ti,ab.                                                                                                        | 8554  |
| 4  | (hospital adj2 discharge*).ti,ab.                                                                                                        | 11838 |
| 5  | (discharge adj2 plan*).ti,ab.                                                                                                            | 654   |
| 6  | (discharge adj service?).ti,ab.                                                                                                          | 62    |
| 7  | (discharge adj program*).ti,ab.                                                                                                          | 98    |
| 8  | (discharge adj procedure*).ti,ab.                                                                                                        | 41    |
| 9  | 2 or 3 or 4 or 5 or 6 or 7 or 8                                                                                                          | 18941 |
| 10 | Length of Stay/                                                                                                                          | 7440  |
| 11 | Patient Readmission/                                                                                                                     | 1143  |
| 12 | (readmission or readmitted or re-admission or re-admitted).ti,ab.<br>(rehospitali?ation* or re-hospitali?ation* or rehospitali?ed or re- | 5876  |
| 13 | hospitali?ed).ti,ab.                                                                                                                     | 2856  |
| 14 | length of stay.ti,ab.                                                                                                                    | 12222 |
| 15 | length of hospital stay.ti,ab.                                                                                                           | 7767  |
| 16 | ((hospital or hospitali?ed or bed) adj2 days).ti,ab.                                                                                     | 5788  |
| 17 | Continuity of Patient Care/                                                                                                              | 642   |
| 18 | 10 or 11 or 12 or 13 or 14 or 15 or 16 or 17                                                                                             | 34930 |
| 19 | 9 and 18                                                                                                                                 | 5431  |
| 20 | 1 or 19                                                                                                                                  | 5850  |

## Appendix 2: League table of head-to-head comparisons

Results in the bottom left correspond to the *network meta-analysis* results, and results in the top right correspond to the *pairwise meta-analysis* findings. Results in **bold** as statistically significant

### 30-day readmission (odds ratio)

|                    |                    |                    |                           |                    |
|--------------------|--------------------|--------------------|---------------------------|--------------------|
| <b>Low</b>         | 0.74 (0.35 - 1.54) | 0.83 (0.39 - 1.73) | <b>0.77 (0.65 - 0.91)</b> | 0.81 (0.42 - 1.56) |
| 0.96 (0.76 - 1.22) | <b>Medium</b>      | .                  | <b>0.80 (0.67 - 0.96)</b> | .                  |
| 0.81 (0.64 - 1.04) | 0.85 (0.66 - 1.09) | <b>High</b>        | 0.98 (0.81 - 1.17)        | 0.85 (0.52 - 1.39) |

|                           |                           |                           |                           |                           |
|---------------------------|---------------------------|---------------------------|---------------------------|---------------------------|
| <b>0.78 (0.66 - 0.92)</b> | <b>0.81 (0.68 - 0.97)</b> | 0.96 (0.80 - 1.15)        | <b>UC</b>                 | <b>0.39 (0.23 - 0.64)</b> |
| <b>0.50 (0.32 - 0.77)</b> | <b>0.52 (0.33 - 0.81)</b> | <b>0.61 (0.40 - 0.92)</b> | <b>0.64 (0.42 - 0.96)</b> | <b>Min</b>                |

### 90-day readmission (odds ratio)

|                           |                    |                           |                           |
|---------------------------|--------------------|---------------------------|---------------------------|
| <b>Medium</b>             | .                  | .                         | <b>0.64 (0.45 - 0.92)</b> |
| 0.99 (0.56 - 1.77)        | <b>Low</b>         | .                         | 0.65 (0.41 - 1.02)        |
| 0.90 (0.58 - 1.38)        | 0.90 (0.54 - 1.50) | <b>High</b>               | <b>0.72 (0.57 - 0.91)</b> |
| <b>0.64 (0.45 - 0.92)</b> | 0.65 (0.41 - 1.02) | <b>0.72 (0.57 - 0.91)</b> | <b>UC</b>                 |

### 180-day readmission (odds ratio)

|                           |                           |                           |                    |                           |
|---------------------------|---------------------------|---------------------------|--------------------|---------------------------|
| <b>Low</b>                | .                         | .                         | 0.87 (0.42 - 1.79) | <b>0.42 (0.28 - 0.63)</b> |
| 0.79 (0.42 - 1.46)        | <b>Medium</b>             | .                         | .                  | <b>0.57 (0.35 - 0.91)</b> |
| <b>0.57 (0.37 - 0.90)</b> | 0.73 (0.43 - 1.23)        | <b>High</b>               | 0.73 (0.38 - 1.44) | 0.79 (0.63 - 1.00)        |
| <b>0.57 (0.34 - 0.96)</b> | 0.72 (0.38 - 1.38)        | 0.99 (0.62 - 1.58)        | <b>Min</b>         | 0.81 (0.50 - 1.32)        |
| <b>0.45 (0.30 - 0.66)</b> | <b>0.57 (0.35 - 0.91)</b> | <b>0.78 (0.62 - 0.98)</b> | 0.78 (0.51 - 1.22) | <b>UC</b>                 |

### ED visit (odds ratio)

|                           |                    |                    |                    |                           |
|---------------------------|--------------------|--------------------|--------------------|---------------------------|
| <b>Low</b>                | .                  | .                  | .                  | <b>0.68 (0.48 - 0.96)</b> |
| 0.83 (0.54 - 1.29)        | <b>High</b>        | 0.93 (0.46 - 1.87) | .                  | 0.81 (0.62 - 1.06)        |
| 0.77 (0.38 - 1.56)        | 0.93 (0.50 - 1.71) | <b>Min</b>         | .                  | 0.88 (0.44 - 1.74)        |
| 0.69 (0.44 - 1.09)        | 0.83 (0.56 - 1.24) | 0.89 (0.45 - 1.77) | <b>Medium</b>      | 0.98 (0.73 - 1.32)        |
| <b>0.68 (0.48 - 0.96)</b> | 0.81 (0.62 - 1.06) | 0.88 (0.48 - 1.62) | 0.98 (0.73 - 1.32) | <b>UC</b>                 |

### Uptake (odds ratio)

|                    |                    |                    |                    |                           |
|--------------------|--------------------|--------------------|--------------------|---------------------------|
| <b>Low</b>         | 0.63 (0.17 - 2.32) | 1.13 (0.58 - 2.18) | 0.86 (0.67 - 1.11) | 0.86 (0.23 - 3.24)        |
| 0.97 (0.71 - 1.34) | <b>High</b>        | .                  | 0.92 (0.74 - 1.14) | <b>0.23 (0.06 - 0.86)</b> |
| 0.93 (0.67 - 1.27) | 0.95 (0.70 - 1.29) | <b>Medium</b>      | 0.98 (0.78 - 1.22) | .                         |
| 0.90 (0.70 - 1.15) | 0.92 (0.74 - 1.14) | 0.97 (0.77 - 1.21) | <b>UC</b>          | 0.68 (0.26 - 1.79)        |
| 0.48 (0.20 - 1.13) | 0.49 (0.21 - 1.15) | 0.52 (0.22 - 1.23) | 0.54 (0.23 - 1.24) | <b>Min</b>                |

### Mortality (odds ratio)

|                    |                    |                    |                    |                    |
|--------------------|--------------------|--------------------|--------------------|--------------------|
| <b>Min</b>         | .                  | 0.76 (0.54 - 1.07) | 0.73 (0.48 - 1.11) | 0.82 (0.58 - 1.15) |
| 0.87 (0.61 - 1.25) | <b>Medium</b>      | 1.19 (0.52 - 2.73) | .                  | 0.84 (0.68 - 1.02) |
| 0.82 (0.60 - 1.12) | 0.94 (0.74 - 1.20) | <b>Low</b>         | 1.00 (0.67 - 1.49) | 0.90 (0.78 - 1.04) |
| 0.76 (0.55 - 1.03) | 0.87 (0.69 - 1.09) | 0.92 (0.78 - 1.09) | <b>High</b>        | 0.98 (0.88 - 1.10) |
| 0.74 (0.55 - 1.00) | 0.84 (0.69 - 1.03) | 0.90 (0.78 - 1.03) | 0.97 (0.87 - 1.09) | <b>UC</b>          |

### Appendix 3: Characteristics of Included Studies

| ID           | Age (mean, SD)                  | Gender (% male)                  | Ethnicity                                | Condition (or setting if NR)                                                      | Control            | Population (Medical/Mental Health) | Discharge stage   | Complexity | Delivered by          |
|--------------|---------------------------------|----------------------------------|------------------------------------------|-----------------------------------------------------------------------------------|--------------------|------------------------------------|-------------------|------------|-----------------------|
| Adamuz 2015  | I=65, C=72<br>Overall - 68.5    | I=61.9%,<br>C=57.8%,<br>O=60.0%  | NR                                       | Pneumonia                                                                         | TAU                | Medical                            | Pre               | Low        | Nurse                 |
| Arendts 2018 | 78.0 (+/-8.0)                   | 62.00%                           | NR                                       | Discharge from ED, Chest pain, SOB, Constipation, Fall, Urinary Frequency/Dysuria | TAU                | Medical                            | Post/Bridging     | Medium     | Nurse                 |
| Auger 2018   | 2.0 (+/- 5.7)                   | 51.90%                           | White=61.4%<br>Black=29.0%<br>Other=9.7% | Respiratory Diseases, Neurological Diseases, Gastrointestinal Diseases            | TAU                | Medical                            | Pre/Post/Bridging | Medium     | Nurse                 |
| Balaban 2008 | I= 58, C= 54, historic<br>C=61  | I= 42.6% (C 38.8%, historic 40%) | NR                                       | Chronic Conditions (diabetes, CHF, CAD, COPD, Depression)                         | historical and TAU | Medical                            | Pre/Post/Bridging | High       | Nurse                 |
| Barfar 2017  | I=34.5 (12.4),<br>C=36.1 (12.1) | I=56.3%,<br>C=58.8%,<br>O=57.5%  | NR                                       | Bipolar I disorder<br>Schizophrenia-schizoaffective disorder                      | TAU                | Mental health                      | Post/Bridging     | High       | GP + Social worker    |
| Barker 2020  | 69 (11)                         | 49%                              | NR                                       | COPD                                                                              | TAU                | Medical                            | Pre/Post          | Low        | Technology (no staff) |

|                 |                                 |                           |                                                                              |                                                                                                                |     |         |                   |        |                       |
|-----------------|---------------------------------|---------------------------|------------------------------------------------------------------------------|----------------------------------------------------------------------------------------------------------------|-----|---------|-------------------|--------|-----------------------|
| Bawazeer 2021   | I=52.92 (15.9), C=53.83 (15.41) | I=41% C=38%               | NR                                                                           | Patients discharged with Warfarin or Insulin                                                                   | TAU | Medical | Pre/Post          | Medium | Pharmacist (students) |
| Bell 2016       | 60.0 (+/- 14.0)                 | 59%                       | White=77%, Black=18.0%, Other=5%                                             | Acute coronary syndrome, Congestive Heart Failure                                                              | TAU | Medical | Pre/Post/Bridging | Medium | Pharmacist            |
| Biese 2018      | 75 (+/-7.2)                     | 39.90%                    | American Indian/Alaskan=0.2%, Asian=0.4%, Black=19%, White=76.8%, Other=3.6% | Acute Care                                                                                                     | TAU | Medical | Post/Bridging     | Medium | Nurse                 |
| Bloodworth 2019 | I=52.63 (13.6) C= 57.54 (15.1)  | I=57%, C=52%, O=53.88%    | African American I=75%, C=64%, O=68.13%                                      | Acute myocardial infarction<br>Chronic obstructive pulmonary disease<br><br>Chronic heart failure<br>Pneumonia | TAU | Medical | Pre/Post/Bridging | High   | Pharmacist            |
| Bloom 2019      | I= 56 (44–67), C= 56 (48–66)    | I= 46%, C= 55%, O= 50.90% | White: I= 75%, C= 74%, O= 74.13%                                             | Respiratory failure, Sepsis/septic shock, Altered mental status, Liver failure                                 | TAU | Medical | Pre/Post/Bridging | High   | MDT                   |
| Blum 2014       | 72.5 (+/-9)                     | 71%                       | African American=45% , White=55%                                             | Chronic Heart Failure,                                                                                         | TAU | Medical | Post              | Low    | NR                    |

|                     |                                               |                    |                            |                                                                                                         |     |               |                   |        |                     |
|---------------------|-----------------------------------------------|--------------------|----------------------------|---------------------------------------------------------------------------------------------------------|-----|---------------|-------------------|--------|---------------------|
|                     |                                               |                    |                            | Ischemia, T2DM                                                                                          |     |               |                   |        |                     |
| Bonetti 2018        | 65 (+/- 11.5)                                 | 34.50%             | NR                         | AMI, Unstable Angina, CHF, AF                                                                           | TAU | Medical       | Pre/Post          | Medium | Pharmacist          |
| Bonnet Zamponi 2013 | 86.1 (+/-6.2)                                 | 34%                | NR                         | NR Polypharmacy Study                                                                                   | TAU | Medical       | Pre/Bridging      | High   | Geriatrician        |
| Bonsack 2016        | I= 40 (11.9)<br>C= I 41.3 (10.6)              | I= 33.3%, C 48.1%  | I= 84.3%,<br>C=92.2% White | Mental Health (affective, neurotic, PD, psychotic disorder, substance use)                              | TAU | Mental health | Pre/Post/Bridging | High   | Nurse/Social worker |
| Bouchard 2021       | 69 (54-77)                                    | 61.6%              | NR                         | At least one chronic disease (ie, diabetes mellitus, hypertension, pulmonary or cardiovascular disease) | TAU | Medical       | Pre               | Medium | Pharmacist          |
| Bruhwieler 2019     | 71.5 (+/- 20)                                 | 45.50%             | NR                         | Discharges from Stroke, Respiratory, ID, Nephrology, Cardiology and Geriatric Wards                     | TAU | Medical       | Pre               | Low    | Pharmacist          |
| Chen 2018           | 61 (+/- 15)                                   | 56.40%             | NR                         | Congestive Heart Failure                                                                                | TAU | Medical       | Pre/Post          | Medium | Nurse               |
| Coskun 2022         | I=60-69=25,<br>>70=8<br>C 60-69=18,<br>>70=14 | I=71.9%<br>C=84.4% | NR                         | Cardiac                                                                                                 | TAU | Medical       | Pre/Post/Bridging | High   | Nurse + MDT         |



|                |                                                                  |                              |                                                                                                                                     |                                                                                                                   |     |         |                       |      |                                                |
|----------------|------------------------------------------------------------------|------------------------------|-------------------------------------------------------------------------------------------------------------------------------------|-------------------------------------------------------------------------------------------------------------------|-----|---------|-----------------------|------|------------------------------------------------|
| Danielsen 2020 | I=67.3 (9.8),<br>C=65.8<br>(11,1)                                | I=71.6%,<br>C=70.9%          | NR                                                                                                                                  | Heart<br>Problems                                                                                                 | TAU | Medical | Post                  | Low  | Nurse +<br>project co-<br>ordinator            |
| Dawes 2007     | I=46.8 (+/-<br>11.5) C=46.4<br>(+/-12.6)<br>O=46.6 (+/-<br>12.0) | 0%                           | NR                                                                                                                                  | Major Surgery<br>for benign<br>Gynae Disease                                                                      | TAU | Medical | Pre                   | Low  | Nurse                                          |
| Dawson 2021    | I=67 (14),<br>C=66 (15)                                          | 52.30%                       | Black 12%<br>Asian 1.2%<br>White 83%<br>Other 1.5%<br>Unknown 2%                                                                    | All admissions                                                                                                    | TAU | Medical | Post                  | Low  | Nurse                                          |
| Devore 2021    | I = 62.3<br>(13.8)<br>C=62.9<br>(13.4)                           | I= 67.2%<br>C=66.2%          | I= White<br>55/9%<br>Black 35.9%<br>Asian 2.8%<br>Other 6.5%<br><br>C= White<br>56.3%<br>Black= 40.5%<br>Asian= 0.6%<br>Other= 3.7% | Cardiac                                                                                                           | TAU | Medical | Pre/Post/<br>Bridging | Low  | MDT                                            |
| Dhalla 2014    | I=71.2 (+/-<br>16.1),<br>C=71.3 (+/-<br>16), O=71.2<br>(+/-16)   | I=51%,<br>C=52%, O=<br>51.3% | NR                                                                                                                                  | High risk of<br>readmission as<br>defined by<br>LACE criteria                                                     | TAU | Medical | Post/Bridg<br>ing     | High | Interprofessio<br>nal team of<br>co-ordinators |
| Edey 2018      | I=70.6,<br>C=67.8,<br>O=69.0                                     | I=50%<br>C=53%<br>O=51.6%    | NR                                                                                                                                  | Defined via<br>speciality,<br>Cardiovascular,<br>Endocrine, GI,<br>Haematology,<br>ID, Malignancy,<br>MSK, Derma, | TAU | Medical | Pre/Bridgi<br>ng      | Low  | Pharmacist                                     |

|                   |                                            |                               |                                |                                                                                                                                                                                                                                     |                   |         |                       |        |                                   |
|-------------------|--------------------------------------------|-------------------------------|--------------------------------|-------------------------------------------------------------------------------------------------------------------------------------------------------------------------------------------------------------------------------------|-------------------|---------|-----------------------|--------|-----------------------------------|
|                   |                                            |                               |                                | Neuro, Psych,<br>Renal,<br>Respiratory,<br>Rheum,<br>Urology                                                                                                                                                                        |                   |         |                       |        |                                   |
| Englander<br>2014 | Mean NR                                    | I=59.3%<br>C=59.2%<br>O=60.2% | Non-<br>white=28%<br>White=72% | Readmission<br>after discharge<br>from<br>Cardiology or<br>General<br>Medicine Ward                                                                                                                                                 | TAU               | Medical | Pre/Post/<br>Bridging | High   | Nurse +<br>pharmacist             |
| Evans 1993        | I= 184/417 ><br>70. C=<br>198/418 ><br>70. | I = 96%,<br>C=94%             | NR                             | Medical,<br>neurological,<br>or surgical<br>services                                                                                                                                                                                | TAU               | Medical | Pre/Bridging          | Medium | NR                                |
| Farris 2014       | 61(+12)                                    | NR                            | 91% White                      | Cardiovascular<br>related,<br>Asthma, COPD.                                                                                                                                                                                         | TAU               | Medical | Pre/Post/<br>Bridging | High   | Pharmacist                        |
| Finlayson 2018    | O= 77.6<br>(6.64)                          | O= 27%                        | NR                             | Primary<br>admission:<br>Respiratory<br>disease<br>Cardiac disease<br>Renal<br>Falls<br>Other<br>Following<br>Comorbidities:<br>Cardiovascular<br>disease<br>Orthopaedic<br>Respiratory<br>disease<br>Gastrointestinal<br>Endocrine | Active<br>Control | Medical | Post                  | Low    | Nurse +<br>exercise<br>specialist |

|                       |                                                                                                            |                                         |                                                                                                                                                                                                                                                                                    | Renal<br>Other                    |     |               |                       |        |                            |
|-----------------------|------------------------------------------------------------------------------------------------------------|-----------------------------------------|------------------------------------------------------------------------------------------------------------------------------------------------------------------------------------------------------------------------------------------------------------------------------------|-----------------------------------|-----|---------------|-----------------------|--------|----------------------------|
| Finn 2020             | Phase 1: I=<br>80.58 ± 9.1,<br>C=<br>80.76 ± 9.23;<br>9; Phase 2:<br>I=82.05 ± 6.8<br>2 C=<br>84.17 ± 7.4; | Phase 1:<br>53.3%;<br>Phase 2:<br>51.3% | NR                                                                                                                                                                                                                                                                                 | Not reported.<br>Hospitalisation. | TAU | Medical       | Pre                   | Low    | Pharmacist                 |
| Gardner 2020          | I= 83.3 (5.3);<br>C=81.3 (5.4)                                                                             | I= 42.1%;<br>C=42.7%                    | NR                                                                                                                                                                                                                                                                                 | NR                                | TAU | Medical       | Pre/Post/<br>Bridging | High   | SNF/ nursing<br>home staff |
| Gharadi-Vasfi<br>2015 | I= 34.1 (10),<br>C= 36.5<br>(10.1)                                                                         | I= 63%<br>C=72%                         | NR                                                                                                                                                                                                                                                                                 | Severe Mental<br>Health           | TAU | Mental health | Post/Bridg<br>ing     | Medium | NR                         |
| Gilbert 2021          | I= 86.8 (5.4);<br>C=87 (5.5)                                                                               | I= 36.6%; C=<br>36.3%                   | NR                                                                                                                                                                                                                                                                                 | All admissions                    | TAU | Medical       | Pre/Post/<br>Bridging | High   | Nurse                      |
| Gillard 2022          | 39.7 (13.7)                                                                                                | I=48%<br>C=45%                          | I= Asian or<br>Asian British<br>13%; Black,<br>African,<br>Caribbean or<br>Black British<br>16%;<br>Mixed/multiple<br>ethnic groups<br>11%; Other<br>ethnic group<br>3%; White<br>58%.<br>C= Asian or<br>Asian British<br>11%; Black,<br>African,<br>Caribbean or<br>Black British | Mental Health<br>inpatients       | TAU | Mental Health | Pre/Bridgi<br>ng      | Medium | Peer Worker                |

|                |                                |                     |                                                                                                                                                           |                                                                                                                                                                                                                                                        |     |         |                       |        |            |
|----------------|--------------------------------|---------------------|-----------------------------------------------------------------------------------------------------------------------------------------------------------|--------------------------------------------------------------------------------------------------------------------------------------------------------------------------------------------------------------------------------------------------------|-----|---------|-----------------------|--------|------------|
|                |                                |                     | 16%;<br>Mixed/multiple<br>ethnic groups<br>6%; Other<br>ethnic group<br>2%; White 65%                                                                     |                                                                                                                                                                                                                                                        |     |         |                       |        |            |
| Gillespie 2009 | I= 86.4 (4.2)<br>C= 87.1 (4.1) | I=42.3%,<br>C=40.3% | NR                                                                                                                                                        | Heart failure<br>Diabetes<br>mellitus<br>Pulmonary<br>disease<br>Arrhythmia<br>Malignant<br>disease, past<br>and present<br>coronary<br>artery disease<br>Cerebral<br>vascular lesion,<br>past<br>Myocardial<br>infarction<br>Hypertension<br>Dementia | TAU | Medical | Pre/Post/<br>Bridging | Medium | Pharmacist |
| Goldman 2014   | 66.2 (9.0)                     | 56.50%              | Black/African<br>American=24.5<br>%.<br>Latino/Hispani<br>c 19.6%,<br>White= 19.0%,<br>Other/declined<br>=24.5%,<br>Filipino=5.9%,<br>Other<br>Asian=1.9% | NR                                                                                                                                                                                                                                                     | TAU | Medical | Pre/Post/<br>Bridging | High   | Nurse      |

|               |                                                       |                                    |                                                                                                                                                                                                                                  |                                                                                                                                                                                    |         |         |                       |        |                                         |
|---------------|-------------------------------------------------------|------------------------------------|----------------------------------------------------------------------------------------------------------------------------------------------------------------------------------------------------------------------------------|------------------------------------------------------------------------------------------------------------------------------------------------------------------------------------|---------|---------|-----------------------|--------|-----------------------------------------|
| Graabaek 2018 | C=75.0<br>I1=74.8<br>I2=75.5<br>O=75.4                | I1=52%<br>I2=50%<br>C=51%<br>O=51% | NR                                                                                                                                                                                                                               | Neurology,<br>Cardiology,<br>General<br>Medicine                                                                                                                                   | Minimal | Medical | Pre                   | Low    | Pharmacist                              |
| Gurwitz 2014  | 79 (+/- 7.2)                                          | 47.50%                             | NR                                                                                                                                                                                                                               | Diabetes, MI,<br>Heart Failure,<br>COPD, Cancer,<br>Stroke, Renal<br>Disease                                                                                                       | TAU     | Medical | Pre/Bridging          | Medium | Physician +<br>primary care<br>provider |
| Habib 2021    | 64.6 (45.3-<br>75.0)                                  | 61.2%                              | NR                                                                                                                                                                                                                               | Internal<br>Medicine                                                                                                                                                               | TAU     | Medical | Pre/Post              | Medium | Digital                                 |
| Hanrahan 2014 | I= 44.1<br>(11.2) C=<br>45.8 (11.9)                   | I= 55% C<br>50%                    | I: African<br>American=45%<br>, White =30%,<br>Asian=5%,<br>More than one<br>race=10%,<br>Other 10%,<br>Hispanic=5%<br>C: African<br>American=<br>45%, White=<br>30%, More<br>than one race<br>=20%,<br>Hispanic/Latin<br>o=10%, | Mental Health<br>(major<br>depression,<br>bipolar,<br>schizophrenia,<br>schizoaffective<br>disorder,<br>schizophrenia,<br>psychosis,<br>personality<br>disorder,<br>substance use) | TAU     | Medical | Post/Bridging         | High   | Nurse                                   |
| Harrison 2002 | 75.64 (9.87)                                          | 55%                                | NR                                                                                                                                                                                                                               | Heart Failure                                                                                                                                                                      | TAU     | Medical | Pre/Post/<br>Bridging | High   | Nurse                                   |
| Harvey 2014   | I=83.8 (+/-7)<br>C=86.7 (+/-<br>7) O=85.3<br>(+/-7.1) | I=33%<br>C=41%<br>O=37%            | NR                                                                                                                                                                                                                               | Pneumonia,<br>UTI. Heart<br>failure,<br>Anaemia,<br>Volume<br>depletion,<br>Cellulitis, Chest                                                                                      | TAU     | Medical | Post/Bridging         | Medium | Geriatrician +<br>nurse                 |

|                    |                                                            |                           |                                             |                                                                                                                                                |     |               |                       |        |                                                             |
|--------------------|------------------------------------------------------------|---------------------------|---------------------------------------------|------------------------------------------------------------------------------------------------------------------------------------------------|-----|---------------|-----------------------|--------|-------------------------------------------------------------|
|                    |                                                            |                           |                                             | pain,<br>Cerebrovascula<br>r Event, COPD                                                                                                       |     |               |                       |        |                                                             |
| Heaton 2019        | O=61.7<br>(12.7)                                           | 52.80%                    | White= 79.5%,<br>Black=18.3%,<br>Other=2.3% | Congestive<br>heart failure<br>Chronic<br>obstructive<br>pulmonary<br>disease<br>Diabetes<br>mellitus<br>Myocardial<br>infarction<br>Pneumonia | TAU | Medical       | Post/Bridg<br>ing     | High   | Pharmacist                                                  |
| Hegelund 2019      | I=73 (+/-<br>10.4) C=72<br>(+/-8.1)<br>O=72.5 (+/-<br>9.2) | I=39%<br>C=43%<br>O=41.4% | NR                                          | COPD                                                                                                                                           | TAU | Medical       | Pre/Post              | Medium | Nurse                                                       |
| Hegelund 2020      | I= 73 (67-<br>81), C=72<br>(67-78)                         | I=39%,<br>C=43%           | NR                                          | COPD                                                                                                                                           | TAU | Medical       | Pre/Post              | High   | Nurse                                                       |
| Hengartner<br>2016 | I= 42.1<br>(11.4),<br>C=41.0<br>(11.3)                     | I= 50.6%, C<br>49.4%      | NR                                          | Mental Health<br>(Psychosis,<br>mood disorder,<br>other)                                                                                       | TAU | Mental health | Pre/Post/<br>Bridging | High   | Social worker<br>+ someone<br>from network                  |
| Hosein Abadi       | I= 62.3<br>(10.4); C=<br>62.3 (12.4)                       | I= 73.3%;<br>C=66.7%      | NR                                          | Heart Failure                                                                                                                                  | TAU | Medical       | Pre/Bridgi<br>ng      | High   | Researcher                                                  |
| Hu 2020            | I= 32.98<br>(7.73); C=<br>31.79 (9.21)                     | I= 70%; C=<br>59.2%       | NR                                          | Kidney<br>transplant<br>recipient                                                                                                              | TAU | Medical       | Pre/Post              | Medium | Nurse (Dr<br>assists with<br>discharge plan<br>development) |
| Indraratna<br>2022 | I=61.3 (12.3)<br>C= 61.7<br>(12.6)                         | I= 80%<br>C=78%           | NR                                          | Cardiac                                                                                                                                        | TAU | Medical       | Bridging              | Low    | MDT                                                         |

|               |                                                            |                         |                                                                                                                                 |                                                                                                                                                                                                       |     |         |                   |      |                    |
|---------------|------------------------------------------------------------|-------------------------|---------------------------------------------------------------------------------------------------------------------------------|-------------------------------------------------------------------------------------------------------------------------------------------------------------------------------------------------------|-----|---------|-------------------|------|--------------------|
| Jack 2009     | I=50.1 (15.1), C=49.6 (15.3).                              | I= 52%, C=47%.          | White non-Hispanic I=28%, C=27%, Black non-Hispanic I=51%, C=52%, Hispanic I=10%, C=10%, Other race or mixed race I=10%, C=10%. | All admissions                                                                                                                                                                                        | TAU | Medical | Pre/Post/Bridging | High | Nurse + pharmacist |
| Jayaram 2022  | I= 38 (13) C=41 (17)                                       | I=23% C=43%             | NR                                                                                                                              | Asthma                                                                                                                                                                                                | TAU | Medical | Pre/Post/Bridging | High | Nurse + MDT        |
| Jennings 2015 | I=64.88 (+/-10.86) C=64.43 (+/-10.47) O=64.7 (+/-10.7)     | I=43.4% C=46.8% O=44.8% | White=24.4% Black=75% Asian=0.6%                                                                                                | COPD, GORD, Depression, Anxiety                                                                                                                                                                       | TAU | Medical | Pre/Post/Bridging | Low  | Nurse              |
| Karaoui 2020  | I= 74.69 (12.09); C=73.15 (14.74), O=73.9 (no SD reported) | I= 46%; C=43%           | NR                                                                                                                              | Indication for anticoagulation: Atrial fibrillation, venous thromboembolism, aortic valve replacement, mitral valve replacement. Baseline assessed Conditions: hypertension, HF, CKD, Cancer, history | TAU | Medical | Pre               | Low  | Pharmacist         |

|                     |                                            |                                   |                                                                                                 |                                                                                                                                                                                          |     |         |                       |        |                                               |
|---------------------|--------------------------------------------|-----------------------------------|-------------------------------------------------------------------------------------------------|------------------------------------------------------------------------------------------------------------------------------------------------------------------------------------------|-----|---------|-----------------------|--------|-----------------------------------------------|
|                     |                                            |                                   |                                                                                                 | of bleeding,<br>history of<br>gastrointestina<br>l bleeding                                                                                                                              |     |         |                       |        |                                               |
| Kennedy 1987        | I= 80.05. C<br>=80.53                      | I =51%. C=<br>44%.                | White I = 90%.<br>White C= 98%,<br>Black I=10%.<br>Black C= 0%                                  | ICU                                                                                                                                                                                      | TAU | Medical | Pre/Post/<br>Bridging | High   | Nurse                                         |
| Ko 2017             | I=74.9±7.9,<br>C=74.6±8.6,<br>O= 74.8, 8.3 | I=94.4%,<br>C=96.7%,<br>O=95.55%, | NR                                                                                              | COPD is<br>Primary,<br>following<br>Comorbidities:<br>Hypertension,<br>Diabetes<br>mellitus<br>Hyperlipidaemi<br>a<br>Ischaemic<br>heart disease<br>Heart failure<br>Old pulmonary<br>TB | TAU | Medical | Post/Brid<br>ging     | High   | Nurse + physio<br>+ respiratory<br>specialist |
| Kowalkowski<br>2022 | I=<br>64.7 ± 14.9<br>C=<br>62.7 ± 15.5     | I=47%<br>C=49.1%                  | I= White 68.5,<br>Black 27.8,<br>Other 3.7,<br>C = White 61.1,<br>Black 32.5,<br>Other 6.4      | Sepsis                                                                                                                                                                                   | TAU | Medical | Bridging/<br>Post     | Medium | Nurse                                         |
| Kripalani 2012      | I=61(14), C=<br>59(14).                    | I=59.1%,<br>C=58.2%.              | White I= 75.4%<br>Black I=18.2,<br>Other T=6.4<br>White C=78.3,<br>Black C= 16.6,<br>Other=5.1% | Acute coronary<br>syndromes or<br>acute<br>decompensate<br>d heart failure.                                                                                                              | TAU | Medical | Pre/Post              | Medium | Pharmacist +<br>study co-<br>ordinator        |
| Lainscak 2013       | 71 (9)                                     | 71%                               | NR                                                                                              | Primary<br>admission for                                                                                                                                                                 | TAU | Medical | Pre/Post/<br>Bridging | High   | Discharge<br>coordinator                      |



|              |             |                  |    |                                                                                                                                                                                                                                                                          |     |         |                       |      |              |
|--------------|-------------|------------------|----|--------------------------------------------------------------------------------------------------------------------------------------------------------------------------------------------------------------------------------------------------------------------------|-----|---------|-----------------------|------|--------------|
|              |             |                  |    | <p>COPD.<br/>Comorbidities reported:<br/>Ischemic heart disease<br/>Arterial hypertension<br/>Heart failure<br/>Atrial fibrillation<br/>Diabetes mellitus<br/>Malignant disease<br/>Asthma</p>                                                                           |     |         |                       |      |              |
| Laramee 2003 | 70.7 (11.8) | I= 58%.<br>C=50% | NR | <p>CHF.<br/>Comorbidities:<br/>Hypertension<br/>Diabetes mellitus<br/>COPD<br/>Peripheral vascular disease<br/>Smoker<br/>Hyperlipidaemia<br/>Obesity<br/>Prior myocardial infarction<br/>Myocardial infarction this admission<br/>Ischemic origin for heart failure</p> | TAU | Medical | Pre/Post/<br>Bridging | High | Case manager |

|              |                                                                  |                              |                                                                                         |                                                                                                                                                                                     |     |         |               |        |                       |
|--------------|------------------------------------------------------------------|------------------------------|-----------------------------------------------------------------------------------------|-------------------------------------------------------------------------------------------------------------------------------------------------------------------------------------|-----|---------|---------------|--------|-----------------------|
| Latour 2006  | I=65.29 (+/- 15.74),<br>C=62.32 (+/- 17.5),<br>O=63.9 (+/- 16.6) | I=50%,<br>C=52.2%,<br>O=51%  | NR                                                                                      | Endocrine,<br>Circulatory,<br>Respiratory, GI,<br>Infectious<br>disease, Other                                                                                                      | TAU | Medical | Post/Bridging | High   | Nurse                 |
| Lavesen 2016 | I=69.72 (+/- 10.3) C=70.9 (+/- 9.79)<br>O=70.2 (+/- 10.1)        | I=38.7%<br>C=39.4%<br>O=39%  | NR                                                                                      | COPD                                                                                                                                                                                | TAU | Medical | Post/Bridging | Medium | Nurse                 |
| Lea 2020     | I 78 (25.7-95.6), C 80.7 (23.1-96.4)                             | I=47%,<br>C=45%              | NR                                                                                      | Multimorbid patients                                                                                                                                                                | TAU | Medical | Pre/Bridging  | Low    | Pharmacist<br>Medical |
| Legrain 2011 | I= 85.8 (6.0).<br>C= 86.4 (6.3)                                  | I= 30.3%.<br>C=37.4%.        | NR                                                                                      | Dementia,<br>Stroke,<br>Hypertension,<br>Diabetes<br>Mellitus, Heart<br>Failure,<br>Coronary<br>Artery Disease,<br>Arrhythmia,<br>Chronic<br>Pulmonary<br>insufficiency,<br>Cancer. | TAU | Medical | Pre/Bridging  | High   | Geriatrician          |
| Lembeck 2019 | I=82.5 (7.6),<br>C=82.2 (7.3)                                    | I=44%,<br>C=36%,<br>O=39.85% | White=98%                                                                               | NR Frailty                                                                                                                                                                          | TAU | Medical | Post/Bridging | Low    | Nurse                 |
| Levine 2018  | I=65(28);<br>C=60(29)                                            | I=78%;<br>C=27%;<br>O=50%    | I= White 44%,<br>Latino 44%,<br>Black 11%; C=<br>White 45%,<br>Latino 27%,<br>Black 27% | Heart failure,<br>chronic<br>obstructive<br>pulmonary<br>disease, or<br>asthma.                                                                                                     | TAU | Medical | Post/Bridging | Medium | MDT                   |

|               |                                                     |                                       |    |                                                                                                                                                                 |                |         |                       |        |                        |
|---------------|-----------------------------------------------------|---------------------------------------|----|-----------------------------------------------------------------------------------------------------------------------------------------------------------------|----------------|---------|-----------------------|--------|------------------------|
| Li 2014       | I=57.4 (+/-12.8) C=55.2 (+/-11.9) O=56.3 (+/-12.4)  | I=60.9% C=56.1% O=58.5%               | NR | End Stage Renal Failure                                                                                                                                         | TAU            | Medical | Pre/Post/<br>Bridging | High   | Nurse                  |
| Li 2018       | I1=60 ± 15, I2= 62 ± 14, C= 61 ± 15                 | I1=57.5%, I2=54.5%, C=57.3%, O=56.45% | NR | HF is primary, Secondary Ischaemic heart disease non-ischaemic cardiomyopathy Valvular heart diseases Hypertension Diabetes mellitus COPD Chronic renal disease | TAU and Active | Medical | Pre/Post              | Medium | Nurse                  |
| Lin 2014      | I=62.1, C=63.4, O=62.8                              | C=63% I=56% O=60%                     | NR | Cardiology, Respiratory and Endocrine wards                                                                                                                     | TAU            | Medical | Pre                   | Low    | Nurse                  |
| Lindhart 2019 | I1=74 (+/-7) I2=75 (+/-7) C=75 (+/-7) O=75 (+/-6.9) | I1=44.6% I2=53.2% C=39.4% O=45.8%     | NR | Frailty as assessed by Handgrip strength and chair to stand test                                                                                                | Active Control | Medical | Pre/Post/<br>Bridging | Medium | Nurse                  |
| Liu 2020      | 49.69 (13.55)                                       | O= 21.6%                              | NR | Rheumatoid arthritis                                                                                                                                            | TAU            | Medical | Pre/Post/<br>Bridging | High   | Specialist nurse       |
| Lockwood 2019 | I=83.4 (+/-7.1) C=80.9 (+/-7.3) O=82.1 (+/-7.3)     | I=24% C=32% O=28.6%                   | NR | Hip Fracture Surgery                                                                                                                                            | TAU            | Medical | Pre/Post/<br>Bridging | Medium | Occupational therapist |

|                     |                                                                  |                               |                                                                                                                                            |                                                                            |     |         |                       |      |                                                      |
|---------------------|------------------------------------------------------------------|-------------------------------|--------------------------------------------------------------------------------------------------------------------------------------------|----------------------------------------------------------------------------|-----|---------|-----------------------|------|------------------------------------------------------|
| Magny-Normilus 2021 | I=65 (11.3),<br>C=63.9<br>(11.6)                                 | I=49%<br>C=33%                | I= Black=27.3%,<br>Hispanic<br>=38.6% White<br>=33% Other=<br>1.1%, C=<br>Black=31.5%,<br>Hispanic=32.6<br>,<br>White=34.8%,<br>Other=1.1% | Type 2<br>diabetes (and<br>active<br>cardiovascular<br>disease)            | TAU | Medical | Pre/Post/<br>Bridging | High | Nurse +<br>Pharmacist +<br>GP/Inpatient<br>clinician |
| McWilliams<br>2019  | I=58.3 (+/-<br>17.7) C=59.4<br>(+/-17.4)<br>O=58.9 (+/-<br>17.6) | I=48.9%<br>C=47.5%<br>O=48.2% | American<br>Indian or<br>Alaska Native=<br>0.2%<br>Asian=1.3%<br>Black=39%<br>White=50.3%<br>Other=7.2%.<br>Missing n=13                   | COPD, CHF,<br>T2DM, ESRF                                                   | TAU | Medical | Pre/Post/<br>Bridging | High | MDT                                                  |
| Mehta 2020          | 66 (58-73<br>IQR)                                                | 21.90%                        | White=45.5%,<br>Black=43.4%,<br>Asian=2.1%,<br>Hispanic<br>=1.2%,<br>Other=7.8%                                                            | Hip and Knee<br>Arthroplasty                                               | TAU | Medical | Post                  | Low  | Surgeon +<br>nurse + social<br>worker                |
| Meisinger 2013      | I=75.2 (+/-6)<br>C=75.6 (+/-<br>6) O=75.4<br>(+/-6)              | I=63.7%<br>C=61.3%<br>O=62%   | NR                                                                                                                                         | Congestive<br>Heart Failure<br>and Diabetes                                | TAU | Medical | Pre/Post/<br>Bridging | High | Nurse                                                |
| Moher 1992          | Reported as<br>Young and<br>Old                                  | 45.70%                        | NR                                                                                                                                         | NR (all<br>admissions<br>except ICU,<br>and expected<br>imminent<br>death) | TAU | Medical | Pre/Bridgi<br>ng      | Low  | Nurse                                                |

|                 |                                                   |                                                        |                                                                  |                                                                                                                                                |     |               |                       |        |                                                            |
|-----------------|---------------------------------------------------|--------------------------------------------------------|------------------------------------------------------------------|------------------------------------------------------------------------------------------------------------------------------------------------|-----|---------------|-----------------------|--------|------------------------------------------------------------|
| Naylor 1994     | 75.5                                              | Medical DRG- I=57%. C=41%. Surgical DRG: I=82%, C=61%. | White: Medical DRG- I: 61%. C: 69%. Surgical DRG: I: 97%, C: 98% | NR                                                                                                                                             | TAU | Medical       | Pre/Post/<br>Bridging | High   | MDT                                                        |
| Nazareth 2001   | Over 75                                           | NR                                                     | NR                                                               | NR                                                                                                                                             | TAU | Medical       | Pre/Post/<br>Bridging | High   | Pharmacist                                                 |
| Negarandeh 2019 | O=54.9                                            | I=60%<br>C=60.6%<br>O=60.3%                            | NR                                                               | CHF                                                                                                                                            | TAU | Medical       | Post                  | Medium | Nurse                                                      |
| Nguyen 2018     | I=62 (+/- 8.4), C=59.8 (+/-8.8), O=61.2 (+/- 9.6) | I=77.2%<br>C=67.8%<br>O=72.3%                          | NR                                                               | Acute coronary syndrome, MI, Stroke, CHF, Renal Failure, Peptic Ulcer, Asthma, COPD                                                            | TAU | Medical       | Pre/Post              | Medium | Pharmacist                                                 |
| Noel 2020       | I= 65.66 (13.24); C= 63.67 (14.78)                | I=36%,<br>C=37%                                        | Non-Caucasian= 16%                                               | NR (hospitalised patients with 2 or more chronic conditions)                                                                                   | TAU | Medical       | Pre/Post              | Medium | PCP provider or clinical trainee reporting to PCP provider |
| O'Connell 2018  | I=42.1 (+/- 12) C=38 (+/-9.3) O=40.1 (+/- 10.9)   | I=44%<br>C=57%<br>O=50%                                | Black=26%<br>White=59%<br>Unknown=15.8 %                         | Mood Disorder, Psychotic Disorder (schizophrenia, schizoaffective disorder, psychotic disorder not otherwise specified, bipolar disorder (type | TAU | Mental health | Post                  | low    | Peer mentor                                                |

|           |                                   |        |                                                                                                                                                                                                                                                                                    |                                                                                                           |     |         |                   |      |             |
|-----------|-----------------------------------|--------|------------------------------------------------------------------------------------------------------------------------------------------------------------------------------------------------------------------------------------------------------------------------------------|-----------------------------------------------------------------------------------------------------------|-----|---------|-------------------|------|-------------|
|           |                                   |        |                                                                                                                                                                                                                                                                                    | I, type II, or not otherwise specified), or major depressive disorder with or without psychotic features) |     |         |                   |      |             |
| Odeh 2020 | I= 67.3; C= 67.6                  | 46%    | NR                                                                                                                                                                                                                                                                                 | NR                                                                                                        | TAU | Medical | Pre/Post/Bridging | High | Pharmacists |
| Ong 2016  | I=73 (IQ of 62-84), C= 74 (63-82) | 53.80% | African American I=21.5% (18.5-24.5) C= 22.7% (19.6-25.8) O= 22.1%, Hispanic/Latin o I=12.0% (9.6-14.3), C= 10.9% (8.6-13.1), O=11.45%, White I=54.7% (51.0-58.4), C= 54.3% (50.7-58.0), O=54.50%, Asian/Pacific Islander or other I=11.8% (9.4-14.2) C= 12.1% (9.7-14.5) O=11.89% | Heart Failure                                                                                             | TAU | Medical | Pre/Post/Bridging | High | Nurse       |

|                |                                  |                                   |                                                                                                                                          |                                                                                                                                                                                                                                                                |     |               |                       |        |                                                                 |
|----------------|----------------------------------|-----------------------------------|------------------------------------------------------------------------------------------------------------------------------------------|----------------------------------------------------------------------------------------------------------------------------------------------------------------------------------------------------------------------------------------------------------------|-----|---------------|-----------------------|--------|-----------------------------------------------------------------|
| Oscalices 2019 | 62.6 (+/- 15.2)                  | 59.20%                            | NR                                                                                                                                       | CHF, HTN, T2DM, Dyslipidaemias                                                                                                                                                                                                                                 | TAU | Medical       | Pre/Post              | Low    | Researcher                                                      |
| Ougrin 2020    | I=16.23 (1.54)<br>C=16.34 (1.70) | I= 32.1%<br>C=37.7%               | I=White British 52.8%, Other 47.2%, C =White British 45.3, Other 54.7                                                                    | Adolescent Mental Health                                                                                                                                                                                                                                       | TAU | Mental health | Pre/Post/<br>Bridging | High   | Consultant +admin+ nurses (community)+ clinical support workers |
| Pardessus 2002 | 83.2 (7.7)                       | 21.60%                            | NR                                                                                                                                       | Hospitalised for Falls                                                                                                                                                                                                                                         | TAU | Medical       | Pre/Bridging          | Low    | Occupational therapist                                          |
| Parsons 2020   | I=81.1(7.8),<br>C=80.5(8.3)      | I=23.2%,<br>C=27.3%,<br>O=24.81%  | European I=97.5%,<br>C=97.5,<br>O=97.5%.<br>Māori (indigenous population) I= 2.0%, C=1.5%, O=1.75%<br>Other I=0.5%<br>C=1.0%.<br>O=0.75% | Traumatic brain injury<br>Spinal fracture<br>Soft tissue<br>Clavicle, shoulder, and humeral fracture<br>Wrist and forearm fracture<br>Pelvic fracture<br>Hip fracture<br>Femur and knee fracture<br>Tibia, fibula, ankle, and foot fracture.<br>Other fracture | TAU | Medical       | Post/Bridging         | High   | Health care assistants                                          |
| Phatak 2016    | I=55.4,<br>C=55.8 (no SDs given) | I=37.95%,<br>C=41.8%,<br>O=39.92% | NR                                                                                                                                       | Cardiovascular disease<br>Pneumonia<br>Respiratory<br>Infectious                                                                                                                                                                                               | TAU | Medical       | Pre/Post/<br>Bridging | Medium | Pharmacist                                                      |

|                       |                                                                          |                                                       |             |                                                                                                                                                                                          |     |         |                       |        |                              |
|-----------------------|--------------------------------------------------------------------------|-------------------------------------------------------|-------------|------------------------------------------------------------------------------------------------------------------------------------------------------------------------------------------|-----|---------|-----------------------|--------|------------------------------|
|                       |                                                                          |                                                       |             | disease<br>Gastrointestina<br>l<br>Endocrine<br>Genitourinary<br>Haematologica<br>l<br>Injury<br>Neurological<br>Heart failure<br>Myocardial<br>infarction<br>Mental/substa<br>nce abuse |     |         |                       |        |                              |
| Piette 2020           | 60.7 (12.9)                                                              | 46.30%                                                | White 80.2% | Admitted to<br>acute hospital                                                                                                                                                            | TAU | Medical | Post/Brid<br>ging     | Medium | Electronic<br>voice recorder |
| Pourrat 2020          | c/I<br>sequence:<br>61.6(16.5),<br>I/C<br>sequence<br>63.7 (16.7)        | C/I = 52.3%,<br>I/C = 57.85%                          | NR          | All general<br>admissions                                                                                                                                                                | TAU | Medical | Pre/Post/<br>Bridging | Medium | Pharmacist                   |
| Qian 2019             | I=66.54 ±<br>10.16, C=<br>64.8 ± 10.49                                   | I=77%, C=<br>78%<br>O=77.78%                          | NR          | Stroke                                                                                                                                                                                   | TAU | Medical | Pre/Post/<br>Bridging | High   | Nurse                        |
| Ravn Nielsen<br>21018 | Basic I=72<br>(63-80).<br>Extended I:<br>71 (63-79)<br>C= 73 (65-<br>80) | Basic<br>I:49.7%,<br>Extended I:<br>45.0%,<br>C=44.2% | NR          | Heart failure<br>Diabetes<br>Hypertension<br>Arrhythmia<br>Malignant<br>diseases<br>Cerebral<br>vascular lesion<br>Myocardial<br>infarction<br>Pulmonary                                 | TAU | Medical | Pre/Post/<br>Bridging | High   | Pharmacist                   |



|               |                                  |                    |                                  |                                                                                                                                              |     |               |                   |        |                      |
|---------------|----------------------------------|--------------------|----------------------------------|----------------------------------------------------------------------------------------------------------------------------------------------|-----|---------------|-------------------|--------|----------------------|
|               |                                  |                    |                                  | diseases<br>Dementia                                                                                                                         |     |               |                   |        |                      |
| Reynolds 2004 | NR                               | NR                 | NR                               | Mental Health<br>(bipolar disorder,<br>schizophrenia,<br>and depression,                                                                     | TAU | Mental health | Post/Bridging     | Medium | Nurse                |
| Rich 1993     | I= 80.0 (6.3).<br>C=77.3 (6.1)   | I= 39.7%. C= 42.9% | White I = 46.0%. White C= 57.1%, | Primary Chronic Heart Failure,<br>Secondary: Hypertension Diabetes mellitus<br>Prior myocardial infarction<br>Prior Congestive heart failure | TAU | Medical       | Pre/Post/Bridging | High   | Nurse + cardiologist |
| Rich 1995     | I=80.1 +-5.9,<br>C=78.4 +- (6.1) | I= 32%. C= 41%     | "Non-white race": C=59%. I=52%   | Primary Chronic Heart Failure,<br>Secondary: Hypertension Diabetes mellitus<br>Prior myocardial infarction<br>Prior Congestive heart failure | TAU | Medical       | Pre/Post/Bridging | High   | MDT                  |

|              |                                                    |                             |                                                                                      |                                                                                                                                                         |     |         |                   |        |                   |
|--------------|----------------------------------------------------|-----------------------------|--------------------------------------------------------------------------------------|---------------------------------------------------------------------------------------------------------------------------------------------------------|-----|---------|-------------------|--------|-------------------|
| Ritchie 2016 | 63.4(+/-12.5)                                      | 52.40%                      | White=53.1%, Black/Other=46.9%                                                       | CHF, COPD                                                                                                                                               | TAU | Medical | Pre/Post          | Medium | Nurse             |
| Sahota 2017  | 84.1 (+/-6.3)                                      | 36.00%                      | NR                                                                                   | Admitted for 'Acute Medical Emergency'                                                                                                                  | TAU | Medical | Pre/Post/Bridging | high   | Nurse             |
| Salameh 2018 | I=62.3 (15.6), C=63.9, (13.4)                      | I=56.9%, C=54.1%            | NR                                                                                   | Respiratory<br>Gastroenterology<br>Cardiology<br>Neurology<br>Nephrology/Urology<br>Oncology/haematology<br>Infectious<br>Endocrinology<br>Rheumatology | TAU | Medical | Pre               | Low    | Pharmacist        |
| Sales 2014   | I=72.5 (+/-14.8) C=72.6 (+/-13.4) O=72.6 (+/-64.1) | I=37.1% C=47.8% O=42.3%     | NR                                                                                   | Heart Failure                                                                                                                                           | TAU | Medical | Pre/Post          | Medium | Trained volunteer |
| Salmany 2018 | I=47.2 (16), C=49.2 (16)                           | I=45.7%, C=47.3%            | NR                                                                                   | Cancer                                                                                                                                                  | TAU | Medical | Post/Bridging     | Low    | Pharmacist        |
| Santana 2017 | I=58.8 (17.9), C=59.1 (17.9) overall - 59, 17.9    | I= 46.6%, C=53.4%, O= 53.6% | Caucasian I: 78.2% C: 79.5%, O: 78.84%, Non-Caucasian: I: 21.8%, C: 20.5%, O: 21.15% | Diabetes with organ damage<br>Chronic pulmonary disease<br>Liver disease<br>renal disease<br>Congestive heart failure<br>Multiple diagnoses             | TAU | Medical | Pre/Bridging      | Low    | Medical residents |

|                               |                                                            |        |    |                                                                                                                                                                                                               |     |         |                       |        |            |
|-------------------------------|------------------------------------------------------------|--------|----|---------------------------------------------------------------------------------------------------------------------------------------------------------------------------------------------------------------|-----|---------|-----------------------|--------|------------|
|                               |                                                            |        |    | Respiratory<br>Infections<br>Renal/Kidney<br>Metabolic/Elec<br>trolyte<br>disorders<br>Cardiac<br>Loss of<br>Consciousness<br>GI/Hepatic<br>Poison/Toxic<br>Deep vein<br>thrombosis/pul<br>monary<br>embolism |     |         |                       |        |            |
| Shahrokhi<br>2017             | I=34.11 ±<br>12.34<br>C=31.12 ±<br>10.83                   | 73.52% | NR | Head Trauma                                                                                                                                                                                                   | TAU | Medical | Post                  | Low    | Nurse      |
| Shaw 2000                     | 47 (17)                                                    | 37%    | NR | NR                                                                                                                                                                                                            | TAU | Medical | Pre/Post/<br>Bridging | High   | Pharmacist |
| Strano 2019                   | I=78.3<br>(12.5),<br>C=79.9 (7.9),<br>Total=79.0 ±<br>10.5 | 41.8   | NR | HF, Chronic<br>lung disease<br>Hypertension<br>Diabetes<br>Renal failure                                                                                                                                      | TAU | Medical | Post                  | Low    | Nurse      |
| Sudas Na<br>Ayutthaya<br>2017 | 57.7 (+/-<br>10.9)                                         | 40%    | NR | Atrial<br>Fibrillation,<br>DVT, Valvular<br>Heart Disease,<br>Mechanical<br>Valves, PE                                                                                                                        | TAU | Medical | Post                  | Low    | Pharmacist |
| Thygesen 2015                 | 77.8 (+/-7.6)                                              | 52%    | NR | Dementia,<br>Acute Medical/<br>Surgical<br>Treatment,                                                                                                                                                         | TAU | Medical | Post/Brid<br>ging     | Medium | GP + nurse |

|                      |                                                               |                                    |                      |                                                                           |     |               |                   |        |               |
|----------------------|---------------------------------------------------------------|------------------------------------|----------------------|---------------------------------------------------------------------------|-----|---------------|-------------------|--------|---------------|
|                      |                                                               |                                    |                      | Active Psychiatric Treatment, Substance Abuse                             |     |               |                   |        |               |
| Tomita 2012          | 37.5 (9.5)                                                    | 71%                                | 62% African American | Mental Health (Schizophrenia, schizoaffective disorder, substance misuse) | TAU | Mental health | Post/Bridging     | Medium | Social worker |
| Utens 2012           | I=68.3 (+/- 10.3),<br>C=67.8 (+/- 11.3),<br>O=68.1 (+/- 10.8) | C=55.1%<br>I=68.6%<br>O=61.9%      | NR                   | COPD                                                                      | TAU | Medical       | Pre/Post/Bridging | Medium | Nurse         |
| van der Heijden 2019 | 74.7 (+/-8.8)                                                 | 47.75%                             | NR                   | NR                                                                        | TAU | Medical       | Pre/Post/Bridging | High   | Pharmacist    |
| Van Spell 2019       | I=77.77 (12.42),<br>C=77.59 (11.89)                           | I=50.7%,<br>C=48.6%,<br>O=49.56%   | NR                   | Heart Failure                                                             | TAU | Medical       | Pre/Post/Bridging | High   | Nurse         |
| Vesterby 2017        | I=63 (range 43-80), C=64 (range 45-84)                        | I=52.78%,<br>C=52.78%,<br>O=52.78% | NR                   | NOF fracture, other                                                       | TAU | Medical       | Post              | Low    | Physio        |
| Vinluan 2015         | I=74 ± 5.9,<br>C=71 ± 6.9                                     | I=14%,<br>C=22%,<br>O=18.75%       | NR                   | Heart Failure                                                             | TAU | Medical       | Pre/Post          | Low    | Pharmacist    |
| Webster 2011         | I=52.2 (+/- 18.2) C=45.9 (+/-17.7)<br>O=49.1 (+/- 18.2)       | I=63.7%<br>C=63.7%<br>O=63.7%      | NR                   | Discharge after surgery, Surgeries Listed. ENT, MaxFac, Ortho (elective + | TAU | Medical       | Pre               | Low    | Nurse         |

|            |                                                              |                             |                                                                                                                                                                                                  |                                                     |                   |         |                       |        |       |
|------------|--------------------------------------------------------------|-----------------------------|--------------------------------------------------------------------------------------------------------------------------------------------------------------------------------------------------|-----------------------------------------------------|-------------------|---------|-----------------------|--------|-------|
|            |                                                              |                             |                                                                                                                                                                                                  | trauma),<br>General,<br>Urology,<br>Plastics, Burns |                   |         |                       |        |       |
| Weiss 2019 | 59.59<br>(17.54)                                             | 48.80%                      | American<br>Indian or<br>Alaska Native<br>=0.8%, Asian<br>3.3%, Black, or<br>African<br>American =<br>14.5%,<br>Hawaiian or<br>Pacific Islander<br>=0.3%, White<br>=65.0%,<br>Unknown =<br>16.1% | Medical/Surgic<br>al Unit                           | Active<br>Control | Medical | Pre                   | Low    | Nurse |
| Wong 2004  | I=61.3 (+/-<br>11) C=63.7<br>(+/-11.1)<br>O=62.1 (+/-<br>11) | I=61.5%<br>C=51%<br>O=56.4% | NR                                                                                                                                                                                               | Type 2<br>Diabetes                                  | TAU               | Medical | Pre/Post              | Medium | Nurse |
| Wong 2014  | Overall=76.5                                                 | NR                          | NR                                                                                                                                                                                               | NR                                                  | Active<br>Control | Medical | Pre/Post/<br>Bridging | Medium | Nurse |
| Wong 2015  | I=67.5(11.6),<br>C=<br>71.5(11.6),<br>O=69.5<br>(11.8)       | I=37%,<br>C=37%<br>O=37%    | NR                                                                                                                                                                                               | Stroke,<br>Haemorrhagic<br>and Ischaemic<br>split   | TAU               | Medical | Pre/Post/<br>Bridging | High   | Nurse |
| Wong 2016  | 78.4 (+/-<br>13.4)                                           | 52.50%                      | NR                                                                                                                                                                                               | Chronic Heart<br>Failure                            | TAU               | Medical | Pre/Post/<br>Bridging | High   | MDT   |
| Wu 2019    | I=70.2(6.2),<br>C=68.6(5.8)<br>O= 68.6                       | I=68.6%,<br>C=71.4%         | NR                                                                                                                                                                                               | Acute MI                                            | TAU               | Medical | Pre/Post              | Medium | NR    |

|              |                                                          |                                     |                                                                                                |                                                                                 |     |         |                       |        |            |
|--------------|----------------------------------------------------------|-------------------------------------|------------------------------------------------------------------------------------------------|---------------------------------------------------------------------------------|-----|---------|-----------------------|--------|------------|
|              | (SD 5.8) 69.4<br>(6.1)                                   |                                     |                                                                                                |                                                                                 |     |         |                       |        |            |
| Xie 2018     | 37.1 (+/-<br>14.1)                                       | 14%                                 | NR                                                                                             | Systemic Lupus<br>Erythematous                                                  | TAU | Medical | Post                  | Medium | Nurse      |
| Xu 2019      | I=63.24 ±<br>10.19,<br>C=64.12 ±<br>10.19                | I=67.5%,<br>C=74.2%,<br>O=70.85%    | NR                                                                                             | CHD,<br>Hypertension,<br>Hyperlipidaemi<br>a<br>Obesity<br>Diabetes<br>mellitus | TAU | Medical | Pre/Post              | Medium | Pharmacist |
| Yiandom 2020 | I=52.4 (17.7)<br>C=53.4<br>(18.1)                        | I=50.4%<br>C=53.4%                  | I:<br>White=75.9%,<br>Black=21.1%,<br>Other=1%: C:<br>White=76.2%,<br>Black=20.7%,<br>Other=2% | All general<br>medicine<br>discharges                                           | TAU | Medical | Post                  | Low    | Nurse      |
| Yin 2020     | I=47.5 (18.3)<br>C=46.3<br>(19.0)                        | I=64.5%<br>C=63.3%                  | NR                                                                                             | Nephrotic<br>syndrome                                                           | TAU | Medical | Pre/Post              | Medium | Pharmacist |
| You 2020     | I=50.8 (9.9),<br>C=51.3<br>(10.6)                        | I=73.6%,<br>C=73.8%                 | NR                                                                                             | Heart Failure                                                                   | TAU | Medical | Post                  | Low    | Nurse      |
| Zhang 2018   | I=66.6<br>(10.5);<br>C=65.3<br>(8.13); O=<br>65.9 (9.43) | I=50%,<br>C=57%,<br>O=46.2%<br>53.8 | NR                                                                                             | MI, Angina                                                                      | TAU | Medical | Pre/Post/<br>Bridging | High   | Nurse      |

## Appendix 4: Risk of Bias Assessment

| Study           | Allocation concealment | Intention-to-treat (yes/no) | Attrition (<5%, 5-20%, or >20%) | Selection reporting bias | Total score | RoB Grade |
|-----------------|------------------------|-----------------------------|---------------------------------|--------------------------|-------------|-----------|
| Adamuz 2015     | 3                      | 3                           | 2                               | 2                        | 10          | Low       |
| Arendts         | 1                      | 3                           | 2                               | 1                        | 7           | Low       |
| Auger 2018      | 3                      | 3                           | 2                               | 2                        | 10          | Low       |
| Balaban 2008    | 1                      | 1                           | 2                               | 2                        | 6           | High      |
| Barfar 2017     | 3                      | 3                           | 1                               | 2                        | 9           | Low       |
| Barker 2020     | 1                      | 3                           | 0                               | 1                        | 5           | High      |
| Bawazeer 2021   | 3                      | 2                           | 1                               | 2                        | 7           | Low       |
| Bell 2016       | 3                      | 3                           | 2                               | 2                        | 10          | Low       |
| Biese 2018      | 3                      | 3                           | 2                               | 1                        | 9           | Low       |
| Bloodworth 2019 | 3                      | 3                           | 2                               | 1                        | 9           | Low       |
| Bloom 2019      | 1                      | 3                           | 0                               | 2                        | 6           | High      |
| Blum            | 1                      | 1                           | 2                               | 2                        | 6           | High      |
| Bonetti 2018    | 3                      | 3                           | 0                               | 0                        | 6           | High      |
| Bonnet Zamponi  | 1                      | 2                           | 0                               | 2                        | 5           | High      |
| Bonsack 2016    | 3                      | 3                           | 1                               | 1                        | 8           | Low       |
| Bouchard 2021   | 3                      | 2                           | 2                               | 2                        | 9           | Low       |
| Bruhweiler 2019 | 1                      | 1                           | 1                               | 2                        | 5           | High      |
| Chen 2018       | 3                      | 3                           | 1                               | 2                        | 9           | Low       |
| Chen 2019       | 1                      | 3                           | 2                               | 2                        | 8           | Low       |
| Coskun 2021     | 2                      | 1                           | 2                               | 2                        | 7           | Low       |
| Dalal 2018      | 1                      | 1                           | 0                               | 2                        | 4           | High      |
| Danielsen 2020  | 3                      | 3                           | 2                               | 1                        | 9           | Low       |
| Dawes           | 3                      | 1                           | 2                               | 2                        | 8           | Low       |

|                    |   |   |   |   |    |      |
|--------------------|---|---|---|---|----|------|
| Dawson 2021        | 3 | 3 | 0 | 1 | 7  | Low  |
| Devore 2021        | 3 | 1 | 1 | 2 | 7  | Low  |
| Dhalla 2014        | 3 | 3 | 2 | 2 | 10 | Low  |
| Edey 2019          | 1 | 1 | 2 | 1 | 5  | High |
| Englander          | 1 | 3 | 0 | 2 | 6  | High |
| Evans 1993         | 1 | 1 | 2 | 2 | 6  | High |
| Farris 2014        | 3 | 1 | 2 | 2 | 8  | Low  |
| Finlayson 2018     | 3 | 3 | 1 | 1 | 8  | Low  |
| Finn 2020          | 1 | 3 | 2 | 2 | 8  | Low  |
| Gardner 2020       | 2 | 1 | 0 | 2 | 5  | High |
| Gharadi-Vasfi 2015 | 3 | 3 | 2 | 2 | 10 | Low  |
| Gilbert 2021       | 3 | 3 | 2 | 2 | 10 | Low  |
| Gillard 2022       | 2 | 3 | 2 | 2 | 9  | Low  |
| Gillespie 2009     | 3 | 1 | 1 | 2 | 7  | Low  |
| Goldman 2014       | 3 | 3 | 1 | 2 | 9  | Low  |
| Graabaek 2018      | 3 | 3 | 1 | 2 | 9  | Low  |
| Gurwitz 2014       | 3 | 3 | 0 | 1 | 7  | Low  |
| Habib 2021         | 2 | 3 | 0 | 2 | 7  | Low  |
| Hanrahan           | 3 | 1 | 1 | 2 | 7  | Low  |
| Harrison 2002      | 3 | 3 | 1 | 2 | 9  | Low  |
| Harvey 2014        | 3 | 3 | 1 | 2 | 9  | Low  |
| Heaton 2019        | 3 | 3 | 2 | 2 | 10 | Low  |
| Hegelund 2019      | 2 | 3 | 0 | 1 | 6  | High |
| Hegelund 2020      | 1 | 3 | 0 | 2 | 6  | High |
| Hengartner 2016    | 3 | 3 | 1 | 1 | 8  | Low  |
| Hosein Abadi 2020  | 3 | 3 | 1 | 2 | 9  | Low  |
| Hu 2020            | 3 | 1 | 1 | 2 | 7  | Low  |
| Indraratna 2022    | 1 | 3 | 2 | 2 | 8  | Low  |
| Jack 2009          | 3 | 3 | 0 | 2 | 8  | Low  |



|                     |   |   |   |   |    |      |
|---------------------|---|---|---|---|----|------|
| Jayaram 2022        | 2 | 3 | 2 | 2 | 9  | Low  |
| Jennings 2014       | 3 | 1 | 2 | 1 | 7  | Low  |
| Karaoui 2020        | 1 | 3 | 1 | 2 | 7  | Low  |
| Kennedy 1987        | 3 | 1 | 0 | 1 | 5  | High |
| Ko 2017             | 3 | 3 | 0 | 2 | 8  | Low  |
| Kowalkowski 2022    | 1 | 1 | 0 | 1 | 3  | High |
| Kripalani 2012      | 3 | 3 | 2 | 2 | 10 | Low  |
| Lainscak 2013       | 3 | 3 | 1 | 2 | 9  | Low  |
| Laramée 2003        | 1 | 1 | 1 | 2 | 5  | High |
| Latour              | 1 | 3 | 0 | 1 | 5  | High |
| Lavesen 2016        | 1 | 1 | 0 | 1 | 3  | High |
| Lea 2020            | 3 | 3 | 2 | 2 | 10 | Low  |
| Legrain 2011        | 3 | 3 | 2 | 2 | 10 | Low  |
| Lembeck 2019        | 3 | 3 | 2 | 2 | 10 | Low  |
| Levine 2018         | 3 | 1 | 1 | 2 | 7  | Low  |
| Li 2014             | 3 | 3 | 1 | 1 | 8  | Low  |
| Li 2018             | 3 | 3 | 1 | 2 | 9  | Low  |
| Lin                 | 1 | 3 | 2 | 2 | 8  | Low  |
| Lindhardt 2019      | 3 | 1 | 1 | 1 | 6  | High |
| Liu 2020            | 3 | 3 | 1 | 2 | 9  | Low  |
| Lockwood 2019       | 3 | 3 | 0 | 2 | 8  | Low  |
| Magny-Normilus 2021 | 1 | 3 | 2 | 2 | 8  | Low  |
| McWilliams 2019     | 2 | 3 | 0 | 2 | 7  | Low  |
| Mehta 2020          | 3 | 3 | 1 | 2 | 9  | Low  |
| Meisinger           | 3 | 3 | 1 | 1 | 8  | Low  |
| Moher 1992          | 1 | 1 | 2 | 1 | 5  | High |
| Naylor 1994         | 1 | 3 | 0 | 1 | 5  | High |
| Nazareth 2001       | 3 | 1 | 0 | 2 | 6  | High |
| Negarandeh 2019     | 3 | 1 | 1 | 2 | 7  | Low  |

|                         |   |   |   |   |    |      |
|-------------------------|---|---|---|---|----|------|
| Nguyen 2018             | 3 | 1 | 0 | 2 | 6  | High |
| Noel 2020               | 3 | 1 | 1 | 2 | 7  | Low  |
| O'Connell 2018          | 3 | 3 | 1 | 2 | 9  | Low  |
| Odeh                    | 3 | 3 | 1 | 2 | 9  | Low  |
| Ong 2016                | 3 | 3 | 0 | 2 | 8  | Low  |
| Oscalices 2019          | 3 | 2 | 2 | 0 | 7  | Low  |
| Ougrin 2020             | 1 | 3 | 2 | 2 | 8  | Low  |
| Pardessus 2002          | 1 | 1 | 0 | 0 | 2  | High |
| Parsons 2018            | 1 | 3 | 0 | 1 | 5  | High |
| Parsons 2020            | 3 | 3 | 1 | 2 | 9  | Low  |
| Piette 2020             | 3 | 3 | 1 | 1 | 8  | Low  |
| Pourrat 2020            | 3 | 3 | 2 | 2 | 10 | Low  |
| Qian 2019               | 1 | 1 | 0 | 1 | 3  | High |
| Ravn-Nielson 2018       | 3 | 3 | 2 | 2 | 10 | Low  |
| Reynolds 2004           | 3 | 1 | 0 | 1 | 5  | High |
| Rich 1993               | 1 | 1 | 0 | 2 | 4  | High |
| Rich 1995               | 3 | 3 | 0 | 0 | 6  | High |
| Ritchie 2016            | 1 | 3 | 1 | 2 | 7  | Low  |
| Sahota 2017             | 1 | 3 | 2 | 2 | 8  | Low  |
| Salameh 2018            | 3 | 1 | 2 | 2 | 8  | Low  |
| Sales                   | 1 | 3 | 2 | 2 | 8  | Low  |
| Salmany 2018            | 3 | 1 | 1 | 1 | 6  | High |
| Sanatana 2017           | 3 | 3 | 1 | 2 | 9  | Low  |
| Shahronki 2017          | 1 | 1 | 1 | 1 | 4  | High |
| Shaw 2000               | 1 | 3 | 0 | 0 | 4  | High |
| Strano 2019             | 3 | 1 | 2 | 2 | 8  | Low  |
| Sudas Na Ayutthaya 2018 | 3 | 3 | 2 | 2 | 10 | Low  |
| Thygesen 2015           | 3 | 3 | 2 | 2 | 10 | Low  |
| Tomita 2012             | 3 | 3 | 0 | 0 | 6  | High |

|                      |   |   |   |   |    |      |
|----------------------|---|---|---|---|----|------|
| Utens                | 3 | 3 | 1 | 2 | 9  | Low  |
| van der Heijden 2019 | 1 | 3 | 0 | 1 | 5  | High |
| Van Spell 2019       | 2 | 1 | 2 | 2 | 7  | Low  |
| Vesterby 2017        | 3 | 3 | 2 | 1 | 9  | Low  |
| Vinluan 2015         | 3 | 1 | 0 | 1 | 5  | High |
| Webster              | 3 | 3 | 0 | 2 | 8  | Low  |
| Weiss 2019           | 1 | 3 | 0 | 2 | 6  | High |
| Wong 2004            | 1 | 2 | 1 | 2 | 6  | High |
| Wong 2014            | 3 | 3 | 1 | 2 | 9  | Low  |
| Wong 2015            | 3 | 3 | 1 | 1 | 8  | Low  |
| Wong 2016            | 3 | 3 | 2 | 2 | 10 | Low  |
| Wu 2019              | 1 | 1 | 1 | 1 | 4  | High |
| Xie 2018             | 3 | 3 | 2 | 2 | 10 | Low  |
| Xu 2019              | 3 | 3 | 2 | 2 | 10 | Low  |
| Yiadom 2020          | 1 | 3 | 1 | 2 | 7  | Low  |
| Yin 2020             | 3 | 1 | 2 | 2 | 8  | Low  |
| You 2020             | 2 | 1 | 2 | 1 | 6  | High |
| Zhang 2017           | 1 | 1 | 1 | 2 | 5  | High |

## Appendix 5: Inconsistency Analysis

### 30-day readmission

| Comparison  | k  | prop | nma  | 95%-CI       | direct | 95%-CI       | indir. | 95%-CI       | RoR  | 95%-CI        | z     | p-value       |
|-------------|----|------|------|--------------|--------|--------------|--------|--------------|------|---------------|-------|---------------|
| High:Low    | 1  | 0.11 | 1.23 | [0.96; 1.56] | 1.21   | [0.58; 2.53] | 1.23   | [0.95; 1.59] | 0.98 | [0.45; 2.15]  | -0.04 | 0.9694        |
| High:Medium | 0  | 0    | 1.18 | [0.92; 1.52] | .      | .            | 1.18   | [0.92; 1.52] | .    | .             | .     | .             |
| High:Min    | 2  | 0.7  | 0.61 | [0.40; 0.92] | 0.85   | [0.52; 1.39] | 0.29   | [0.13; 0.61] | 2.96 | [1.20; 7.29]  | 2.36  | <b>0.0185</b> |
| High:UC     | 22 | 0.97 | 0.96 | [0.80; 1.15] | 0.98   | [0.81; 1.17] | 0.52   | [0.18; 1.49] | 1.87 | [0.65; 5.39]  | 1.16  | 0.2481        |
| Low:Medium  | 1  | 0.11 | 0.96 | [0.76; 1.22] | 0.74   | [0.35; 1.54] | 0.99   | [0.77; 1.28] | 0.74 | [0.34; 1.62]  | -0.75 | 0.4533        |
| Low:Min     | 2  | 0.43 | 0.5  | [0.32; 0.77] | 0.81   | [0.42; 1.56] | 0.35   | [0.20; 0.61] | 2.32 | [0.97; 5.52]  | 1.89  | 0.0584        |
| Low:UC      | 29 | 0.97 | 0.78 | [0.66; 0.92] | 0.77   | [0.65; 0.91] | 1.13   | [0.46; 2.78] | 0.68 | [0.27; 1.71]  | -0.81 | 0.4169        |
| Medium:Min  | 0  | 0    | 0.52 | [0.33; 0.81] | .      | .            | 0.52   | [0.33; 0.81] | .    | .             | .     | .             |
| Medium:UC   | 25 | 0.98 | 0.81 | [0.68; 0.97] | 0.8    | [0.67; 0.96] | 1.43   | [0.37; 5.44] | 0.56 | [0.15; 2.18]  | -0.83 | 0.4064        |
| Min:UC      | 3  | 0.66 | 1.57 | [1.04; 2.37] | 2.58   | [1.56; 4.28] | 0.6    | [0.30; 1.22] | 4.29 | [1.80; 10.18] | 3.3   | <b>0.001</b>  |

#### Footnote:

k: number of studies; prop: proportion of direct evidence; nma: network meta-analysis estimate; 95%-CI: 95% confidence interval; direct: direct evidence estimates; indir.: indirect evidence estimates; RoR: Ratio Odds Ratio; z: standardised z score.

### 90-day readmission

| Comparison  | k  | prop | nma  | 95%-CI       | direct | 95%-CI       | indir. | 95%-CI       | RoR | 95%-CI | z | p-value |
|-------------|----|------|------|--------------|--------|--------------|--------|--------------|-----|--------|---|---------|
| High:Low    | 0  | 0    | 1.11 | [0.66; 1.88] | .      | .            | 1.11   | [0.66; 1.88] | .   | .      | . | .       |
| High:Medium | 0  | 0    | 1.18 | [0.76; 1.83] | .      | .            | 1.18   | [0.76; 1.83] | .   | .      | . | .       |
| High:UC     | 17 | 1    | 0.71 | [0.56; 0.91] | 0.71   | [0.56; 0.91] | .      | .            | .   | .      | . | .       |
| Low:Medium  | 0  | 0    | 1.06 | [0.59; 1.92] | .      | .            | 1.06   | [0.59; 1.92] | .   | .      | . | .       |
| Low:UC      | 7  | 1    | 0.64 | [0.40; 1.02] | 0.64   | [0.40; 1.02] | .      | .            | .   | .      | . | .       |
| Medium:UC   | 11 | 1    | 0.6  | [0.42; 0.87] | 0.6    | [0.42; 0.87] | .      | .            | .   | .      | . | .       |

### 180-day readmission

| Comparison  | k  | prop | nma  | 95%-CI       | direct | 95%-CI       | indir. | 95%-CI       | RoR  | 95%-CI        | z     | p-value |
|-------------|----|------|------|--------------|--------|--------------|--------|--------------|------|---------------|-------|---------|
| High:Low    | 0  | 0    | 1.77 | [1.11; 2.81] | .      | .            | 1.77   | [1.11; 2.81] | .    | .             | .     | .       |
| High:Medium | 0  | 0    | 1.31 | [0.84; 2.05] | .      | .            | 1.31   | [0.84; 2.05] | .    | .             | .     | .       |
| High:Min    | 1  | 0.36 | 1.16 | [0.76; 1.76] | 0.73   | [0.36; 1.48] | 1.49   | [0.88; 2.50] | 0.49 | [0.21; 1.18]  | -1.58 | 0.114   |
| High:UC     | 14 | 0.98 | 0.76 | [0.60; 0.97] | 0.79   | [0.62; 1.00] | 0.21   | [0.04; 0.97] | 3.8  | [0.80; 18.14] | 1.67  | 0.0942  |
| Low:Medium  | 0  | 0    | 0.74 | [0.43; 1.29] | .      | .            | 0.74   | [0.43; 1.29] | .    | .             | .     | .       |
| Low:Min     | 1  | 0.45 | 0.65 | [0.40; 1.08] | 0.87   | [0.41; 1.84] | 0.52   | [0.26; 1.02] | 1.66 | [0.61; 4.57]  | 0.99  | 0.3239  |
| Low:UC      | 5  | 0.94 | 0.43 | [0.29; 0.65] | 0.42   | [0.28; 0.64] | 0.62   | [0.12; 3.11] | 0.68 | [0.13; 3.57]  | -0.46 | 0.6457  |
| Medium:Min  | 1  | 0.47 | 0.88 | [0.55; 1.43] | 1.1    | [0.55; 2.22] | 0.72   | [0.37; 1.40] | 1.53 | [0.58; 4.01]  | 0.86  | 0.389   |
| Medium:UC   | 9  | 0.92 | 0.58 | [0.40; 0.86] | 0.54   | [0.36; 0.81] | 1.3    | [0.33; 5.13] | 0.42 | [0.10; 1.75]  | -1.19 | 0.2339  |
| Min:UC      | 3  | 0.8  | 0.66 | [0.45; 0.96] | 0.66   | [0.44; 1.01] | 0.65   | [0.28; 1.49] | 1.02 | [0.40; 2.60]  | 0.05  | 0.9606  |

### ED visit

| Comparison  | k  | prop | nma  | 95%-CI       | direct | 95%-CI       | indir. | 95%-CI       | RoR  | 95%-CI       | z    | p-value |
|-------------|----|------|------|--------------|--------|--------------|--------|--------------|------|--------------|------|---------|
| High:Low    | 0  | 0    | 1.2  | [0.78; 1.84] | .      | .            | 1.2    | [0.78; 1.84] | .    | .            | .    | .       |
| High:Medium | 0  | 0    | 0.82 | [0.56; 1.20] | .      | .            | 0.82   | [0.56; 1.20] | .    | .            | .    | .       |
| High:Min    | 2  | 0.77 | 0.93 | [0.51; 1.69] | 0.93   | [0.47; 1.84] | 0.93   | [0.26; 3.28] | 1.01 | [0.24; 4.23] | 0.01 | 0.9943  |
| High:UC     | 17 | 1    | 0.82 | [0.63; 1.06] | 0.82   | [0.63; 1.06] | .      | .            | .    | .            | .    | .       |
| Low:Medium  | 0  | 0    | 0.68 | [0.44; 1.06] | .      | .            | 0.68   | [0.44; 1.06] | .    | .            | .    | .       |
| Low:Min     | 0  | 0    | 0.77 | [0.39; 1.54] | .      | .            | 0.77   | [0.39; 1.54] | .    | .            | .    | .       |
| Low:UC      | 9  | 1    | 0.68 | [0.48; 0.95] | 0.68   | [0.48; 0.95] | .      | .            | .    | .            | .    | .       |
| Medium:Min  | 0  | 0    | 1.13 | [0.59; 2.19] | .      | .            | 1.13   | [0.59; 2.19] | .    | .            | .    | .       |
| Medium:UC   | 16 | 1    | 0.99 | [0.76; 1.31] | 0.99   | [0.76; 1.31] | .      | .            | .    | .            | .    | .       |
| Min:UC      | 2  | 0.8  | 0.88 | [0.48; 1.59] | 0.88   | [0.45; 1.71] | 0.87   | [0.23; 3.31] | 1.01 | [0.23; 4.48] | 0.01 | 0.9913  |

## Mortality

| Comparison  | k  | prop | nma  | 95%-CI       | direct | 95%-CI       | indir. | 95%-CI       | RoR  | 95%-CI       | z     | p-value |
|-------------|----|------|------|--------------|--------|--------------|--------|--------------|------|--------------|-------|---------|
| High:Low    | 1  | 0.19 | 1.09 | [0.91; 1.29] | 1      | [0.67; 1.49] | 1.11   | [0.91; 1.34] | 0.9  | [0.58; 1.41] | -0.44 | 0.6582  |
| High:Medium | 0  | 0    | 1.14 | [0.92; 1.42] | .      | .            | 1.14   | [0.92; 1.42] | .    | .            | .     | .       |
| High:Min    | 1  | 0.42 | 1.32 | [1.00; 1.74] | 1.37   | [0.90; 2.10] | 1.28   | [0.89; 1.84] | 1.07 | [0.61; 1.87] | 0.24  | 0.8077  |
| High:UC     | 12 | 0.97 | 0.97 | [0.87; 1.09] | 0.98   | [0.88; 1.10] | 0.74   | [0.38; 1.43] | 1.33 | [0.68; 2.60] | 0.84  | 0.4033  |
| Low:Medium  | 1  | 0.08 | 1.05 | [0.83; 1.32] | 0.84   | [0.37; 1.92] | 1.07   | [0.84; 1.36] | 0.78 | [0.33; 1.85] | -0.56 | 0.5757  |
| Low:Min     | 2  | 0.63 | 1.22 | [0.92; 1.60] | 1.32   | [0.93; 1.86] | 1.06   | [0.67; 1.67] | 1.25 | [0.71; 2.21] | 0.76  | 0.4456  |
| Low:UC      | 17 | 0.95 | 0.9  | [0.78; 1.03] | 0.9    | [0.78; 1.04] | 0.83   | [0.45; 1.52] | 1.08 | [0.58; 2.02] | 0.26  | 0.7967  |
| Medium:Min  | 1  | 0.27 | 1.16 | [0.85; 1.57] | 1.22   | [0.67; 2.21] | 1.14   | [0.79; 1.63] | 1.07 | [0.53; 2.15] | 0.2   | 0.8448  |
| Medium:UC   | 16 | 0.96 | 0.86 | [0.71; 1.03] | 0.85   | [0.70; 1.03] | 1.07   | [0.39; 2.88] | 0.79 | [0.29; 2.19] | -0.44 | 0.657   |
| Min:UC      | 3  | 0.76 | 0.74 | [0.57; 0.96] | 0.81   | [0.60; 1.09] | 0.55   | [0.32; 0.95] | 1.46 | [0.79; 2.70] | 1.2   | 0.2308  |

## Intervention Uptake

| Comparison  | k  | prop | nma  | 95%-CI       | direct | 95%-CI       | indir. | 95%-CI        | RoR  | 95%-CI        | z     | p-value |
|-------------|----|------|------|--------------|--------|--------------|--------|---------------|------|---------------|-------|---------|
| High:Low    | 1  | 0.06 | 1.02 | [0.74; 1.39] | 1.59   | [0.43; 5.82] | 0.99   | [0.71; 1.37]  | 1.61 | [0.42; 6.13]  | 0.69  | 0.4873  |
| High:Medium | 0  | 0    | 0.95 | [0.70; 1.28] | .      | .            | 0.95   | [0.70; 1.28]  | .    | .             | .     | .       |
| High:Min    | 1  | 0.41 | 0.49 | [0.21; 1.15] | 0.23   | [0.06; 0.86] | 0.84   | [0.28; 2.53]  | 0.27 | [0.05; 1.53]  | -1.48 | 0.1395  |
| High:UC     | 41 | 0.98 | 0.92 | [0.74; 1.14] | 0.92   | [0.74; 1.14] | 1.03   | [0.19; 5.57]  | 0.89 | [0.16; 4.90]  | -0.13 | 0.8965  |
| Low:Medium  | 4  | 0.3  | 0.93 | [0.69; 1.26] | 1.01   | [0.58; 1.74] | 0.9    | [0.63; 1.29]  | 1.11 | [0.58; 2.14]  | 0.32  | 0.7511  |
| Low:Min     | 1  | 0.42 | 0.48 | [0.21; 1.14] | 0.86   | [0.23; 3.23] | 0.32   | [0.11; 0.98]  | 2.67 | [0.47; 15.06] | 1.12  | 0.2647  |
| Low:UC      | 35 | 0.93 | 0.91 | [0.72; 1.15] | 0.89   | [0.70; 1.14] | 1.14   | [0.46; 2.85]  | 0.78 | [0.30; 2.02]  | -0.5  | 0.6151  |
| Medium:Min  | 0  | 0    | 0.52 | [0.22; 1.23] | .      | .            | 0.52   | [0.22; 1.23]  | .    | .             | .     | .       |
| Medium:UC   | 40 | 0.96 | 0.97 | [0.78; 1.20] | 0.98   | [0.79; 1.22] | 0.72   | [0.25; 2.12]  | 1.36 | [0.45; 4.08]  | 0.55  | 0.5836  |
| Min:UC      | 2  | 0.75 | 1.87 | [0.81; 4.32] | 1.47   | [0.56; 3.86] | 3.84   | [0.73; 20.28] | 0.38 | [0.06; 2.62]  | -0.98 | 0.3276  |

## Appendix 6: Publication bias and funnel plots

Comparison adjusted funnel plots.

### 30-day readmission

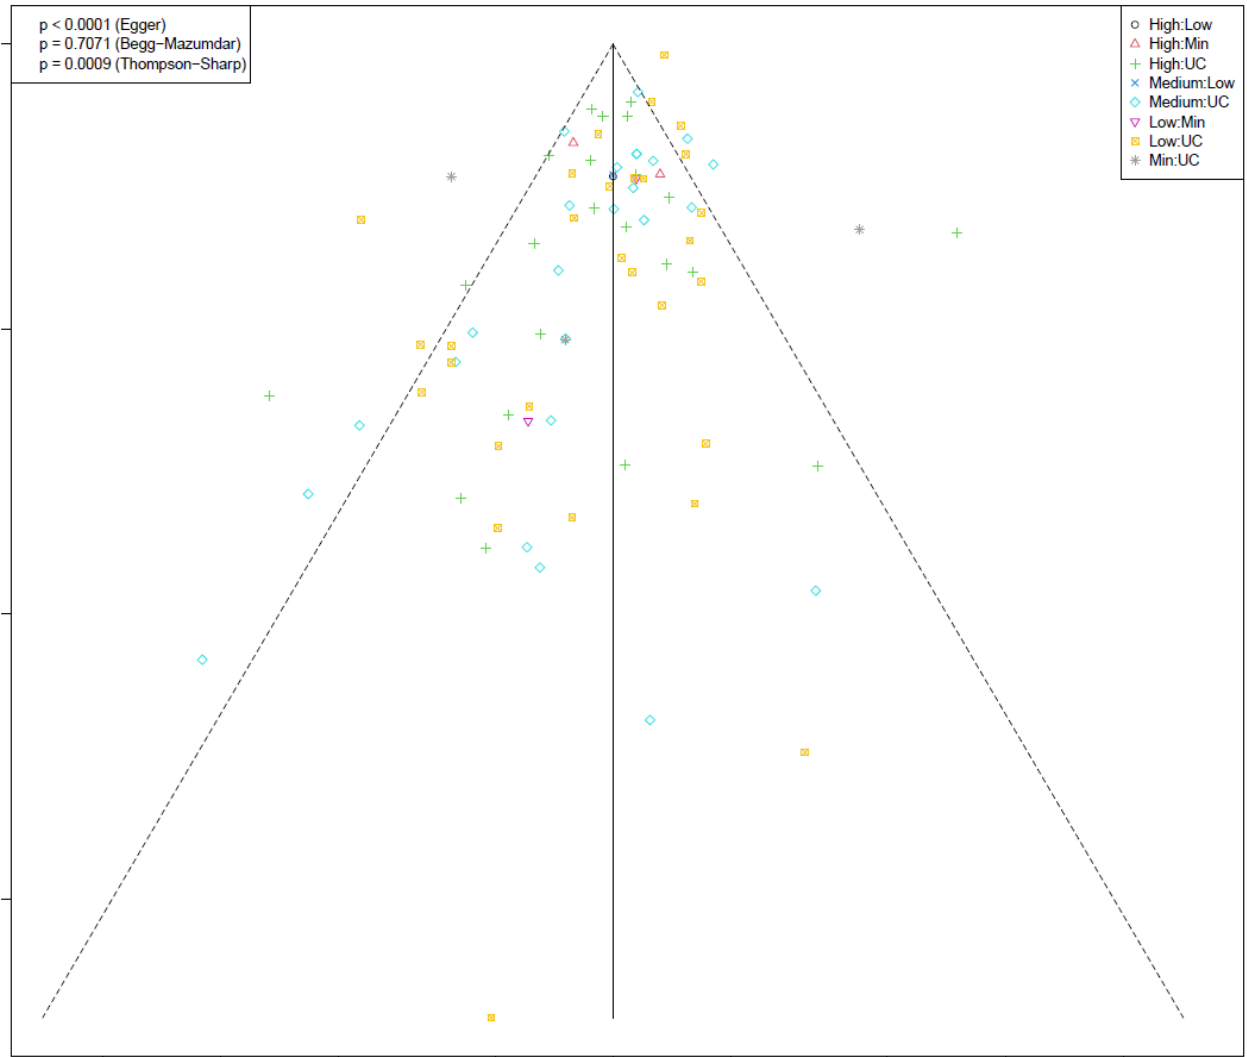

## 90-day readmission

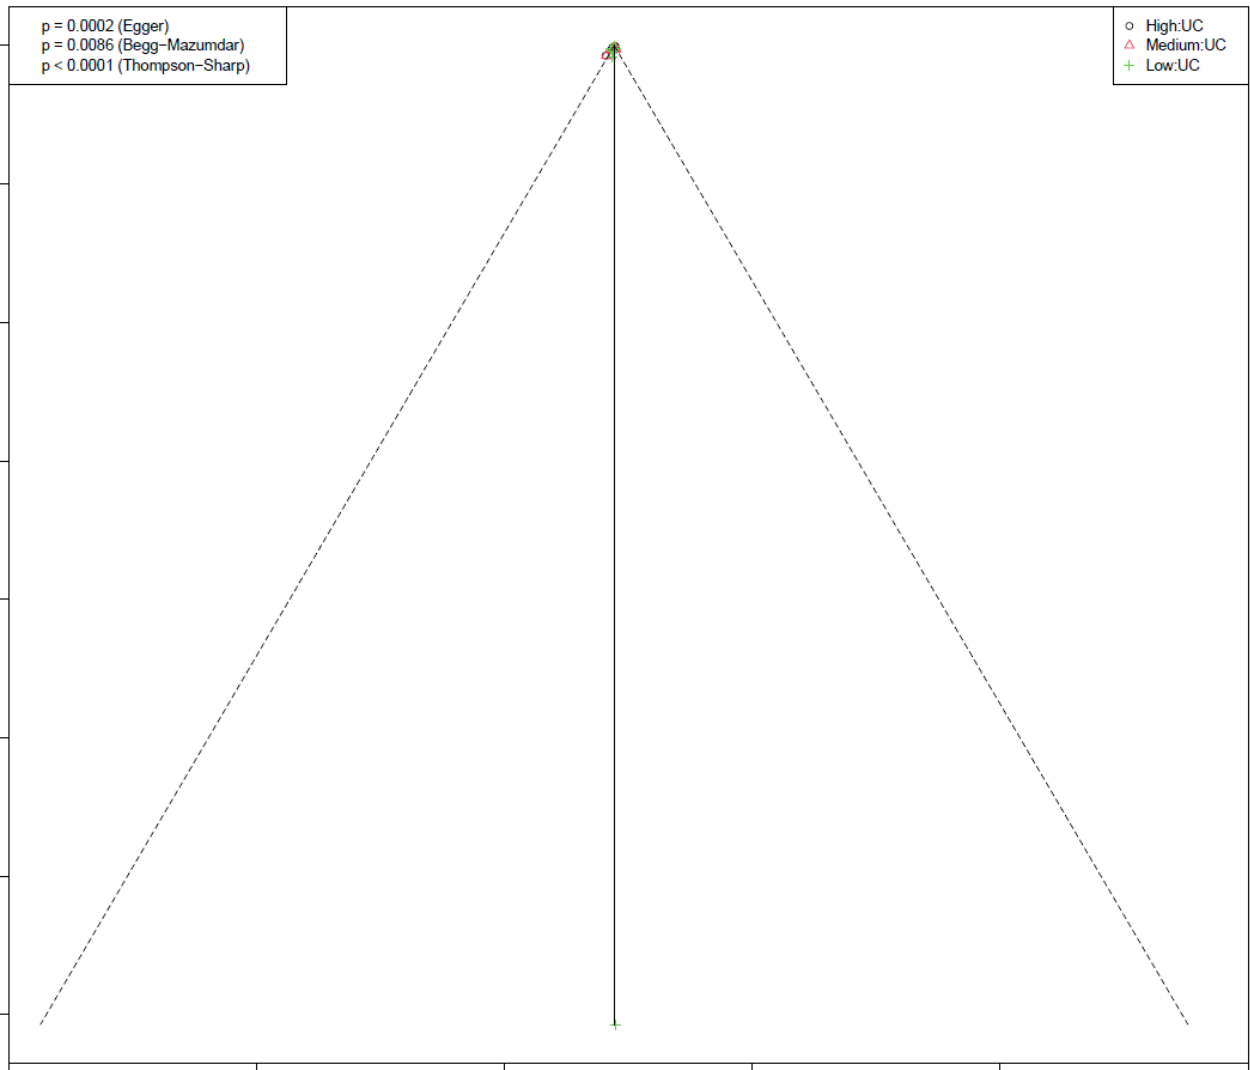



# 180-day readmission

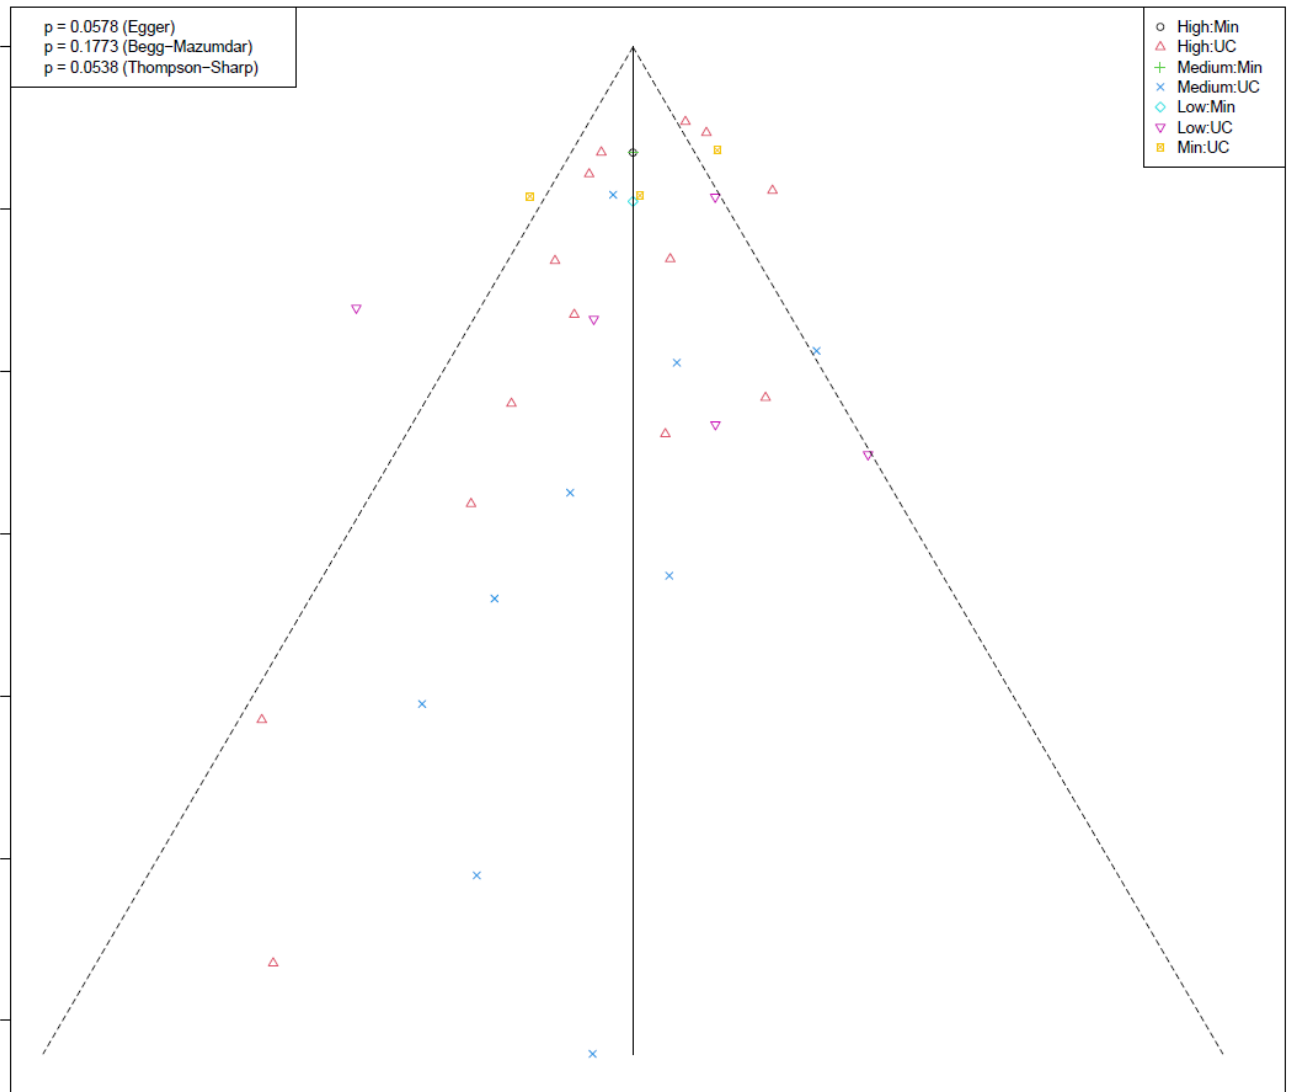

# ED visit

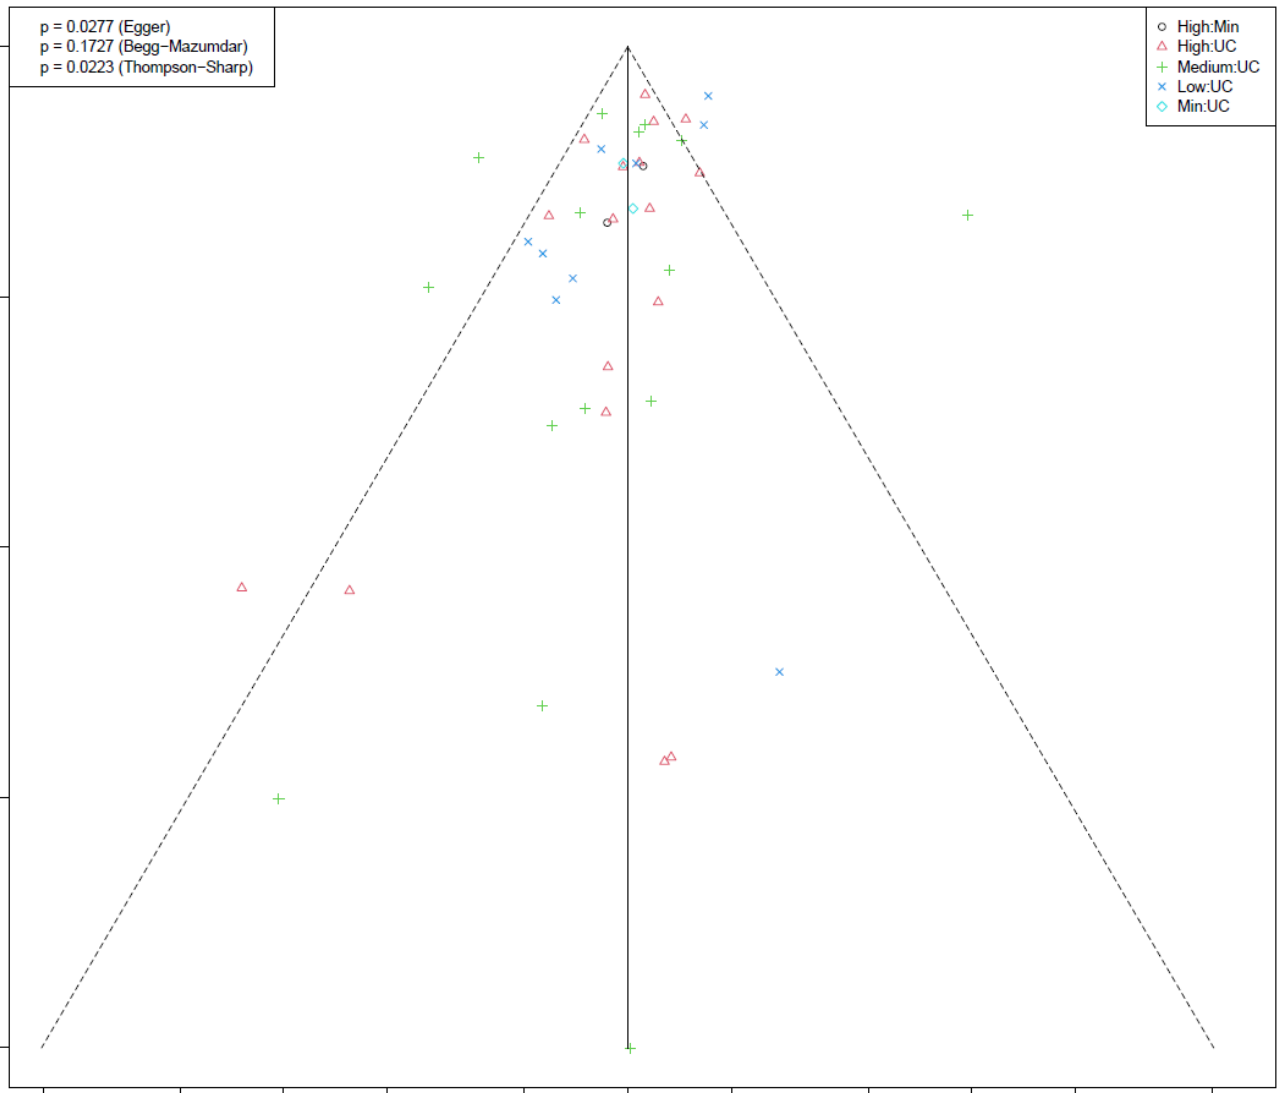

# Mortality

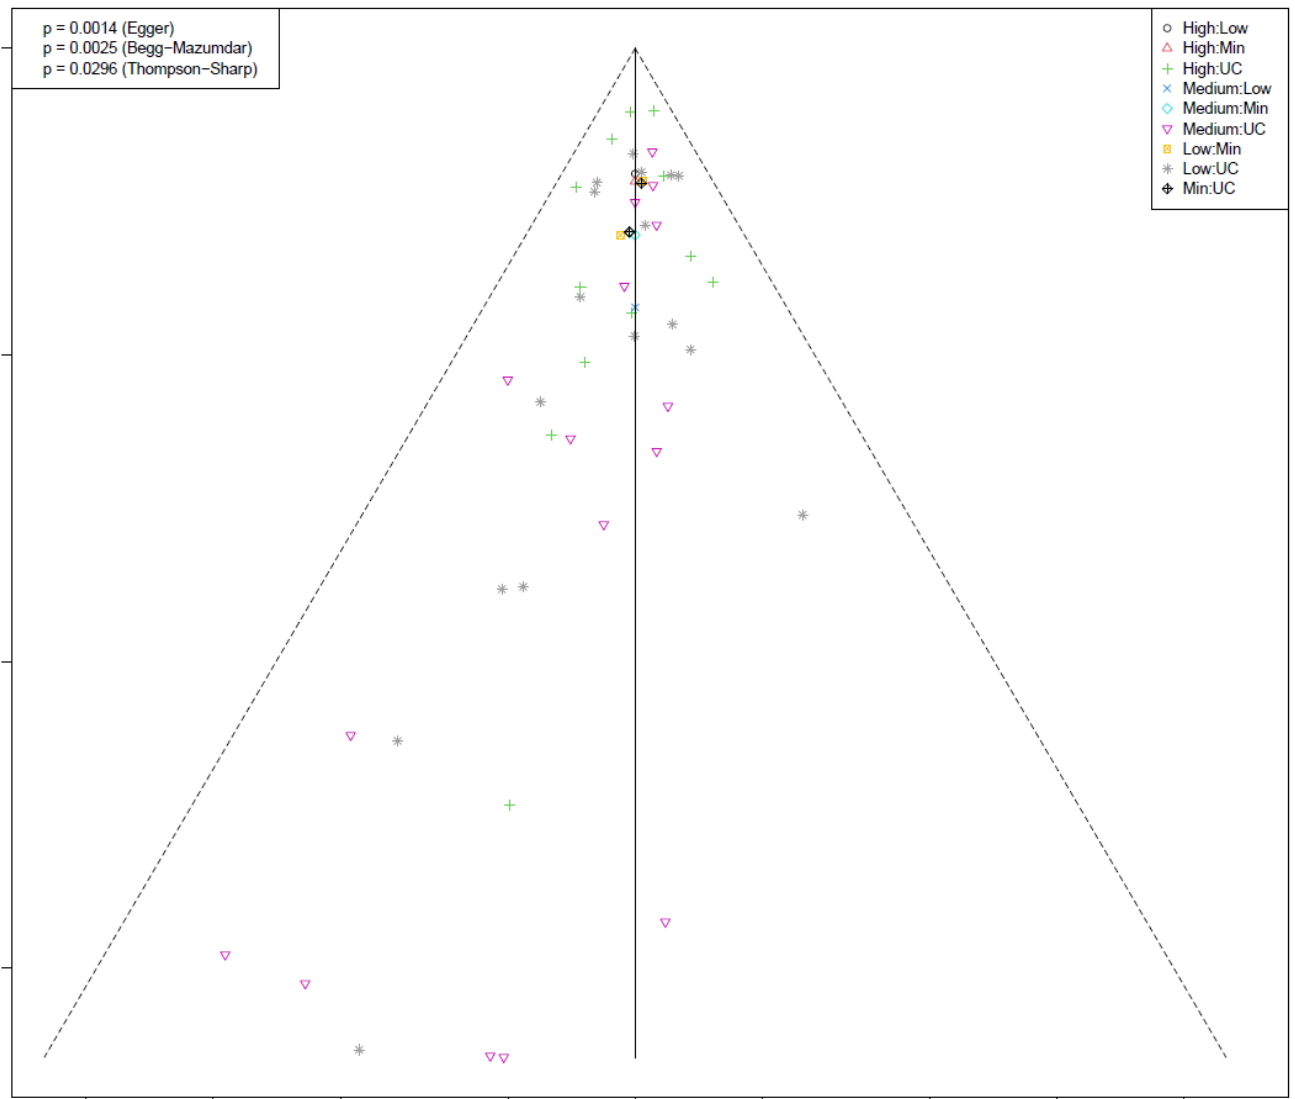

# Intervention Uptake

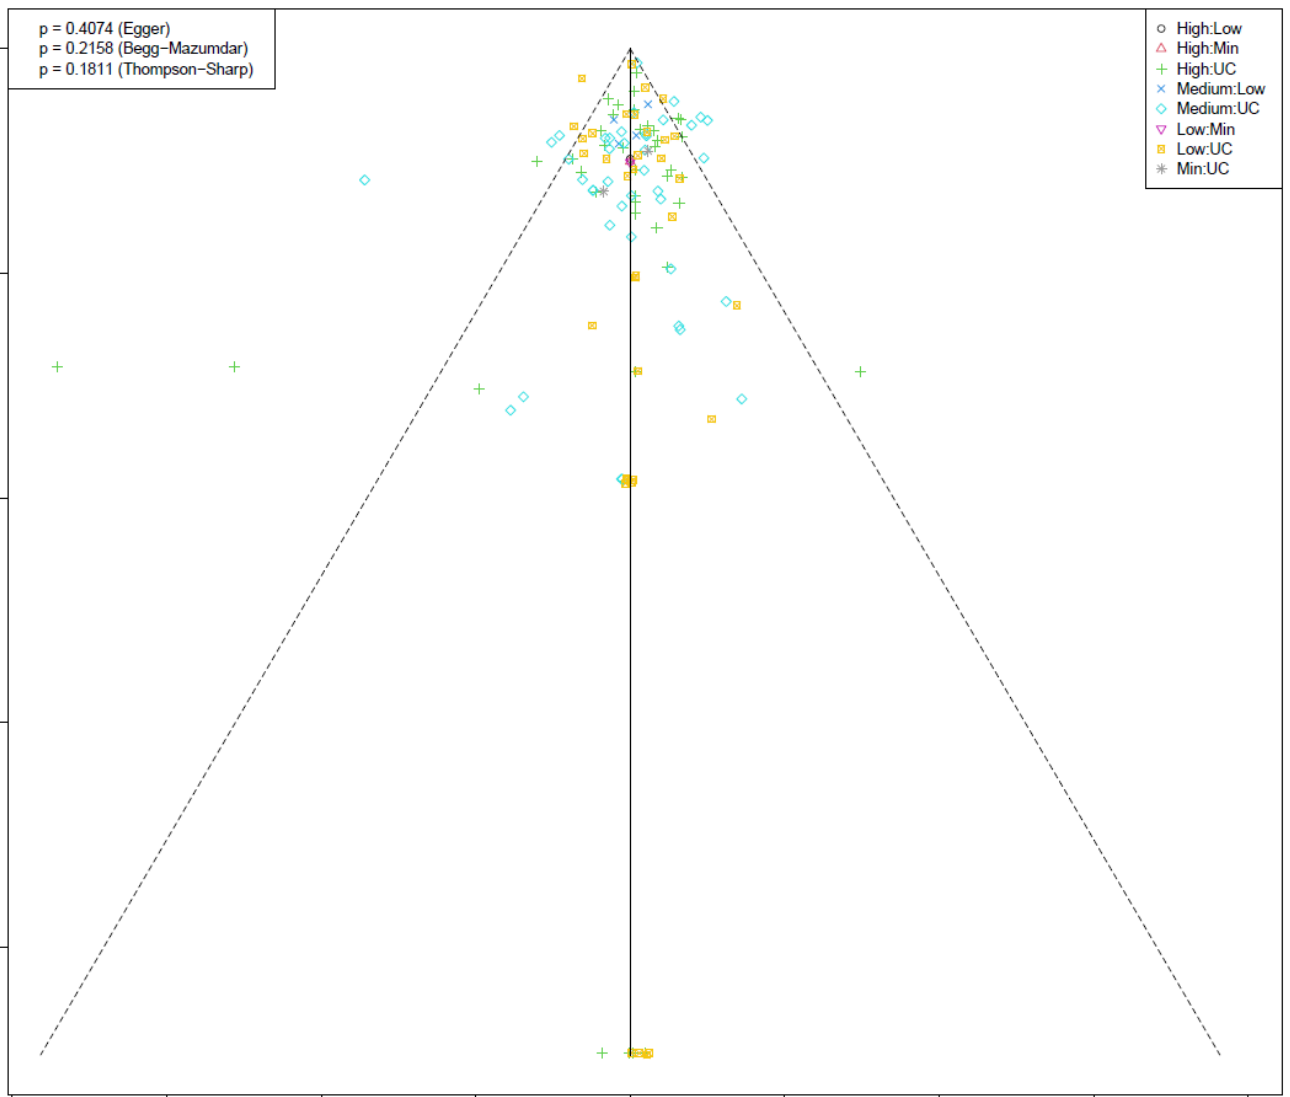

## Appendix 7: Meta-Regressions

### 30-day readmission

Network meta-regression results for the primary outcome ‘readmissions at 30-days’ based on complexity of the discharge intervention. “Results are as log OR”.

| Variable                                 | Category              | High vs. UC (n=22)           | Medium vs. UC (n=25)                 | Low vs. UC (n=29)            |
|------------------------------------------|-----------------------|------------------------------|--------------------------------------|------------------------------|
|                                          |                       | Beta (95% CI), P-value       |                                      |                              |
| <b>Study and patient characteristics</b> |                       |                              |                                      |                              |
| Age                                      | < 45 yrs.             | Ref.                         | Ref.                                 | Ref.                         |
|                                          | 45 to 59 yrs.         | -1.67 (-3.45, 0.10), p=0.064 | 0.03 (-1.05, 1.12), p=0.953          | 1.23 (-0.25, 2.71), p=0.103  |
|                                          | 60to 79 yrs.          | -1.08 (-2.79, 0.62), p=0.214 | 0.19 (-0.54, 0.92), p=0.609          | 0.72 (-0.78, 2.21), pp=0.331 |
|                                          | ≥ 80 yrs.             | -1.54 (-3.35, 0.27), p=0.095 | -1.03 (-2.65, 0.60), p=0.215         | 1.25 (-0.41, 2.91), p=0.139  |
|                                          | NR                    | -1.31 (-3.30, 0.68), p=0.196 | -0.16 (-1.18, 0.87), p=0.766         | 1.40 (-0.46, 3.26), p=0.140  |
| Sex                                      | Female (≥55%)         | Ref.                         | Ref.                                 | Ref.                         |
|                                          | Male (≥55%)           | 0.11 (-0.80, 1.01), p=0.818  | -0.03 (-0.59, 0.53), p=0.907         | -0.41 (-1.18, 0.24), p=0.237 |
|                                          | Mixed                 | 0.28 (-0.39, 0.94), p=0.414  | 0.34 (-0.22, 0.89), p=0.223          | 0.11 (-0.35, 0.57), p=0.644  |
|                                          | NR                    | 0.36 (-0.88, 1.60), p=0.565  | -0.13 (-1.25, 1.00), p=0.823         | -0.10 (-1.02, 0.82), p=0.833 |
| OECD                                     | No                    | Ref.                         | Ref.                                 | Ref.                         |
|                                          | Yes                   | 0.55 (-0.59, 1.68), p=0.345  | 0.62 (-0.01, 1.24), p=0.056          | 0.05 (-0.65, 0.75), p=0.881  |
|                                          | NR                    | NA                           |                                      |                              |
| WHO region                               | Americas              | Ref.                         | Ref.                                 | Ref.                         |
|                                          | Europe                | 0.51 (-0.11, 1.13), p=0.108  | -0.04 (-0.58, 0.50), p=0.874         | 0.03 (-0.51, 0.57), p=0.907  |
|                                          | Western pacific       | -0.47 (-1.61, 0.67), p=0.417 | -0.84 (-1.47, -0.20), <b>p=0.010</b> | -0.08 (-1.41, 0.80), p=0.846 |
|                                          | South-east Asia       | NA                           | NA                                   | NA                           |
|                                          | Africa                | NA                           | NA                                   | 0.10 (-0.98, 0.75), p=0.756  |
|                                          | Eastern Mediterranean | NA                           | NA                                   | 0.53 (-0.84, 1.90), p=0.450  |
|                                          | NR                    | NA                           | NA                                   | NA                           |
| Patient Complexity                       | Low Complexity        | Ref.                         | Ref.                                 | Ref.                         |
|                                          | High Complexity       | NA                           | 0.12 (-0.46, 0.69), p=0.692          | -0.14 (-0.61, 0.33), p=0.557 |
| <b>Intervention Characteristics</b>      |                       |                              |                                      |                              |
| Delivery professional                    | Nurse                 | Ref.                         | Ref.                                 | Ref.                         |
|                                          | Other HCP             | 0.14 (-0.48, 0.77), p=0.649  | -0.22 (-0.78, 0.35), p=0.455         | -0.18 (-0.60, 0.24), p=0.397 |
|                                          | MDT                   | -0.37 (-0.85, 0.10), p=0.121 | 0.01 (-0.53, 0.56), p=0.962          | -0.38 (-0.91, 0.15), p=0.162 |
|                                          | Social/PC             | NA                           | -0.30 (-1.36, 0.76), p=0.580         | -1.20 (-2.68, 0.28), p=0.112 |

|                                |           |                              |                              |                                      |
|--------------------------------|-----------|------------------------------|------------------------------|--------------------------------------|
|                                | Other     | NA                           | -0.36 (-1.22, 0.50), p=0.410 | -1.51 (-2.47, -0.56), <b>p=0.002</b> |
| Population                     | Medical   | Ref.                         | Ref.                         | Ref.                                 |
|                                | MH        | NA                           | NA                           | -1.02 (-2.52, 0.48), p=0.182         |
| Inc. Medication Reconciliation | No        | Ref.                         | Ref.                         | Ref.                                 |
|                                | Yes       | -0.04 (-0.47, 0.27), p=0.851 | 0.11 (-0.32, 0.54), p=0.510  | -0.07 (-0.53, 0.37), p=0.742         |
| <b>Sensitivity analysis</b>    |           |                              |                              |                                      |
| Quality assessment             | Low (>6)  | Ref.                         | Ref.                         | Ref.                                 |
|                                | High (≤6) | -0.74 (-1.74, 0.53), p=0.473 | -0.34 (-1.08, 0.19), p=0.173 | -0.88 (-2.47, -0.09), <b>p=0.042</b> |

## 90-day readmission

### Network meta-regression results for the primary outcome 'readmissions at 90-days' based on complexity of the discharge intervention

| Variable                                 | Category              | High vs. UC (n=17)                | Medium vs. UC (n=11)         | Low vs. UC (n=7)                      |
|------------------------------------------|-----------------------|-----------------------------------|------------------------------|---------------------------------------|
|                                          |                       | Beta (95% CI), P-value            |                              |                                       |
| <b>Study and patient characteristics</b> |                       |                                   |                              |                                       |
| Age                                      | < 45 yrs.             | Ref.                              | Ref.                         | Ref.                                  |
|                                          | 45 to 59 yrs.         | NA                                | -0.31 (-2.59, 1.97), p=0.790 | -0.53 (-2.12, 1.07), p=0.517          |
|                                          | 60to 79 yrs.          | 0.29 (-0.64, 1.21), p=0.544       | 0.15 (-1.30, 1.61), p=0.836  | 0.87 (-0.38, 2.14), p=0.174           |
|                                          | ≥ 80 yrs.             | 0.01 (-1.27, 1.29), p=0.983       | NA                           | NA                                    |
| Sex                                      | NR                    | NA                                | NA                           | NA                                    |
|                                          | Female (≥55%)         | Ref.                              | Ref.                         | Ref.                                  |
|                                          | Male (≥55%)           | 0.71 (-0.02, 1.43), p=0.057       | 0.21 (-1.27, 1.69), p=0.777  | -1.75 (-3.02, 0.48), <b>p=0.007</b>   |
|                                          | Mixed                 | 0.89 (0.30, 1.48), <b>p=0.003</b> | 0.29 (-1.96, 2.54), p=0.801  | 0.09 (-0.91, 1.09), p=0.860           |
| OECD                                     | NR                    | 0.92 (-0.12, 1.97), p=0.084       | NA                           | NA                                    |
|                                          | No                    | Ref.                              | Ref.                         | Ref.                                  |
|                                          | Yes                   | 0.43 (-0.54, 1.40), p=0.382       | -0.04 (-1.12, 1.05), p=0.949 | 1.39 (0.35, 2.44), <b>p=0.009</b>     |
|                                          | NR                    | NA                                | NA                           | NA                                    |
| WHO region                               | Americas              | Ref.                              | Ref.                         | Ref.                                  |
|                                          | Europe                | -0.54 (-1.36, 0.28), p=0.199      | -0.10 (-2.47, 2.27), p=0.935 | 0.57 (-0.70, 1.84), p=0.381           |
|                                          | Western pacific       | -0.22 (-1.44, 0.99), p=0.719      | -0.29 (-2.70, 2.13), p=0.816 | -1.78 (-3.21, -0.035), <b>p=0.015</b> |
|                                          | South-east Asia       | NA                                | NA                           | -0.06 (-2.26, 1.14), p=0.521          |
|                                          | Africa                | NA                                | NA                           | NA                                    |
|                                          | Eastern Mediterranean | -1.02 (-2.66, 0.63), p=0.224      | -0.10 (-2.75, 2.55), p=0.942 | -1.57 (-4.06, 0.92), p=0.216          |
|                                          | NR                    | NA                                | NA                           | NA                                    |
| Patient Complexity                       | Low Complexity        | Ref.                              | Ref.                         | Ref.                                  |
|                                          | High Complexity       | NA                                | NA                           | -0.06 (-2.23, 2.12), p=0.959          |
| <b>Intervention Characteristics</b>      |                       |                                   |                              |                                       |
| Delivery professional                    | Nurse                 | Ref.                              | Ref.                         | Ref.                                  |
|                                          | Other HCP             | -0.03 (-0.99, 0.93), p=0.950      | 1.23 (-1.01, 3.47), p=0.283  | 1.18 (-0.85, 3.21), p=0.254           |
|                                          | MDT                   | -0.18 (-1.01, 0.66), p=0.676      | -0.31 (-2.48, 1.85), p=0.776 | 1.79 (-0.51, 3.06), <b>p=0.006</b>    |
|                                          | Social/PC             | 0.37 (-1.11, 1.84), p=0.624       | NA                           | 1.23 (-0.59-3.04), p=0.18             |
|                                          | Other                 | -0.91 (-2.76, 0.94), p=0.336      | 0.39 (-1.17, 1.95), p=0.625  | 2.30 (0.61, 3.99), <b>p=0.008</b>     |
| Population                               | Medical               | Ref.                              | Ref.                         | Ref.                                  |

|                                |           |                              |                             |                                     |
|--------------------------------|-----------|------------------------------|-----------------------------|-------------------------------------|
|                                | MH        | NA                           | 0.37 (-1.46, 2.20), p=0.695 | 0.06 (-2.24, 2.12), p=0.955         |
| Inc. Medication Reconciliation | No        | Ref.                         | Ref.                        | Ref.                                |
|                                | Yes       | 0.07 (0.84, -0.58), p=0.840  | 1.06 (-0.65, 2.78), p=0.225 | -1.77 (-3.18, 0.35), <b>p=0.015</b> |
| <b>Sensitivity analysis</b>    |           |                              |                             |                                     |
| Quality assessment             | Low (>6)  | Ref.                         | Ref.                        | Ref.                                |
|                                | High (≤6) | -0.94 (-2.10, 0.79), p=0.648 | 0.05 (-0.97, 1.08), p=0.641 | -0.28 (-0.67, 0.48), p=0.189        |



## Mortality

Network meta-regression results for the outcome 'mortality combined' based on complexity of the discharge intervention

| Variable                                 | Category              | High vs. UC (n=12)           | Medium vs. UC (n=16)          | Low vs. UC (n=17)            |
|------------------------------------------|-----------------------|------------------------------|-------------------------------|------------------------------|
|                                          |                       | Beta (95% CI), P-value       |                               |                              |
| <b>Study and patient characteristics</b> |                       |                              |                               |                              |
| Age                                      | < 45 yrs.             | Ref.                         | Ref.                          | Ref.                         |
|                                          | 45 to 59 yrs.         | NA                           | -1.73 (-4.29, 0.893), p=0.185 | NA                           |
|                                          | 60to 79 yrs.          | 0.28 (-1.15, 1.72), p=0.698  | -0.36 (-1.90-1.18), p=0.65    | 0.01 (-0.69, 0.71), p=0.979  |
|                                          | ≥ 80 yrs.             | 0.13 (-1.41, 1.68), p=0.866  | 0.08 (-1.84, 1.68), p=0.9275  | 0.37 (-0.46, 1.19), p=0.382  |
| Sex                                      | NR                    | NA                           | NA                            | 0.46 (-1.03, 1.95), p=0.544  |
|                                          | Female (≥55%)         | Ref.                         | Ref.                          | Ref.                         |
|                                          | Male (≥55%)           | 0.56 (-0.55, 1.66), p=0.324  | 0.13 (-0.89, 1.14), p=0.807   | 0.01 (-0.90, 0.70), p=0.800  |
|                                          | Mixed                 | 0.33 (-0.42, 1.08), p=0.391  | 0.37 (-0.39, 1.14), p=0.341   | -0.07 (-0.74, 0.59), p=0.830 |
| OECD                                     | NR                    | 0.64 (-0.68, 1.96), p=0.340  | NA                            | NA                           |
|                                          | No                    | Ref.                         | Ref.                          | Ref.                         |
|                                          | Yes                   | NA                           | 0.29 (-0.57, 1.16), p=0.503   | 0.29 (-0.49, 1.10), p=0.463  |
|                                          | NR                    | NA                           | NA                            | NA                           |
| WHO region                               | Americas              | Ref.                         | Ref.                          | Ref.                         |
|                                          | Europe                | 0.05 (-0.52, 0.61), p=0.878  | 0.22 (-0.54, 0.98), p=0.571   | 0.27 (-0.44, 0.99), p=0.455  |
|                                          | Western pacific       | NA                           | 0.25 (-0.89, 1.39), p=0.666   | 0.02 (-0.90, 0.94), p=0.960  |
|                                          | South-east Asia       | NA                           | NA                            | NA                           |
|                                          | Africa                | NA                           | NA                            | 0.19 (-0.82, 1.19), p=0.716  |
|                                          | Eastern Mediterranean | NA                           | -1.28 (-3.44, 0.87), p=0.243  | -0.42 (-2.34, 1.51), p=0.673 |
|                                          | NR                    | NA                           | NA                            | NA                           |
| Patient Complexity                       | Low Complexity        | Ref.                         | Ref.                          | Ref.                         |
|                                          | High Complexity       | NA                           | 0.19 (-0.57, 0.95), p=0.629   | 0.02 (-0.60, 0.64), p=0.941  |
| <b>Intervention Characteristics</b>      |                       |                              |                               |                              |
| Delivery professional                    | Nurse                 | Ref.                         | Ref.                          | Ref.                         |
|                                          | Other HCP             | -0.01 (-0.72, 0.70), p=0.979 | 0.13 (-0.65, 0.92), p=0.746   | -0.10 (-0.71, 0.51), p=0.747 |
|                                          | MDT                   | -0.14 (-0.81, 0.54), p=0.695 | 0.23 (-0.86, 1.33), p=0.671   | -0.47 (-1.43, 0.49), p=0.340 |
|                                          | Social/PC             | -0.04 (-1.40, 1.31), p=0.949 | 0.12 (-1.31, 1.54), p=0.873   | NA                           |
|                                          | Other                 | -0.71 (-2.93, 1.51), p=0.529 | NA                            | -0.58 (-2.12, 0.97), p=0.464 |
| Population                               | Medical               | Ref.                         | Ref.                          | Ref.                         |

|                                |           |                              |                              |                              |
|--------------------------------|-----------|------------------------------|------------------------------|------------------------------|
|                                | MH        | NA                           | 0.36 (-1.18, 1.89), p=0.648  | NA                           |
| Inc. Medication Reconciliation | No        | Ref.                         | Ref.                         | Ref.                         |
|                                | Yes       | -0.06 (-0.64, 0.31), p=0.849 | -0.02 (-0.67, 0.70), p=0.960 | -0.05 (-0.62, 0.52), p=0.868 |
| <b>Sensitivity analysis</b>    |           |                              |                              |                              |
| Quality assessment             | Low (>6)  | Ref.                         | Ref.                         | Ref.                         |
|                                | High (≤6) | -0.37 (-0.94, 0.59), p=0.376 | -1.08 (-1.97, 0.54), p=0.489 | -0.78 (-1.84, 0.87), p=0.355 |

## Intervention Uptake

Network meta-regression results for the outcome 'uptake' based on complexity of the discharge intervention

| Variable                                 | Category              | High vs. UC (n=41)           | Medium vs. UC (n=40)                     | Low vs. UC (n=35)            |
|------------------------------------------|-----------------------|------------------------------|------------------------------------------|------------------------------|
|                                          |                       | Beta (95% CI), P-value       |                                          |                              |
| <b>Study and patient characteristics</b> |                       |                              |                                          |                              |
| Age                                      | < 45 yrs.             | Ref.                         | Ref.                                     | Ref.                         |
|                                          | 45 to 59 yrs.         | -0.12 (-1.68, 1.43), p=0.875 | -0.28 (-1.57, 1.01), p=0.671             | -0.72 (-2.01, 0.58), p=0.277 |
|                                          | 60to 79 yrs.          | -0.77 (-2.15, 0.61), p=0.276 | 0.13 (-0.87, 1.16), p=0.788              | -0.53 (-1.74, 0.68), p=0.388 |
|                                          | ≥ 80 yrs.             | 0.24 (-1.58, 2.05), p=0.801  | -0.23 (-1.61, 1.15), p=0.745             | -0.51 (-3.07, 2.05), p=0.698 |
|                                          | NR                    | -0.97 (-4.03, 2.08), p=0.531 | -0.04 (-1.62, 1.72), p=0.957             | NA                           |
| Sex                                      | Female (≥55%)         | Ref.                         | Ref.                                     | Ref.                         |
|                                          | Male (≥55%)           | -0.03 (-1.13, 1.18), p=0.961 | 0.10 (-0.57, 0.77), p=0.766              | 0.25 (-0.36, 0.86), p=0.416  |
|                                          | Mixed                 | -0.78 (-1.87, 0.30), p=0.160 | -0.78 (-1.55, -0.02), <b>p=0.046</b>     | -0.15 (-0.66, 0.37), p=0.581 |
|                                          | NR                    | -0.20 (-2.23, 1.83), p=0.847 | -0.63 (-2.03, 0.77), p=0.379             | -0.52 (-1.47, 0.42), p=0.278 |
| OECD                                     | No                    | Ref.                         | Ref.                                     | Ref.                         |
|                                          | Yes                   | -0.63 (-1.63, 0.37), p=0.215 | -0.60 (-1.20, 0.01), p=0.054             | -0.30 (-0.82, 0.21), p=0.247 |
|                                          | NR                    | NA                           | NA                                       | NA                           |
| WHO region                               | Americas              | Ref.                         | Ref.                                     | Ref.                         |
|                                          | Europe                | 0.51 (-0.52, 1.53), p=0.334  | 0.33 (-0.22, 0.86), p=0.179              | 0.26 (-0.32, 0.84), p=0.381  |
|                                          | Western pacific       | 1.05 (-0.09, 2.20), p=0.073  | 0.42 (-0.15, 0.98), p=0.147              | 0.03 (-0.54, 0.61), p=0.919  |
|                                          | South-east Asia       | NA                           | NA                                       | 0.01 (-2.73, 2.75), p=0.995  |
|                                          | Africa                | NA                           | -3.86 (-5.41, -2.30), <b>p&lt;0.0001</b> | -0.39 (-1.53, 0.75), p=0.503 |
|                                          | Eastern Mediterranean | 0.72 (-1.51, 2.95), p=0.527  | 0.45 (-0.43, 1.32), p=0.320              | 0.88 (-0.30, 2.07), p=0.145  |
|                                          | NR                    | NA                           | NA                                       | NA                           |
| Patient Complexity                       | Low Complexity        | Ref.                         | Ref.                                     | Ref.                         |
|                                          | High Complexity       | 0.65 (-0.22, 1.52), p=0.143  | 0.60 (-0.11, 1.31), p=0.099              | -0.24 (-0.73, 0.25), p=0.330 |
| <b>Intervention Characteristics</b>      |                       |                              |                                          |                              |
| Delivery professional                    | Nurse                 | Ref.                         | Ref.                                     | Ref.                         |
|                                          | Other HCP             | -0.47 (-1.62, 0.68), p=0.423 | 0.45 (-0.28, 1.17), p=0.228              | 0.24 (-0.34, 0.82), p=0.417  |
|                                          | MDT                   | -0.61 (-1.72, 0.59), p=0.281 | -0.12 (-1.11, 0.87), p=0.814             | -0.12 (-0.43, 0.66), p=0.675 |
|                                          | Social/PC             | 0.40 (-1.06, 1.87), p=0.586  | -0.25 (-1.39, 0.89), p=0.674             | 0.17 (-1.31, 1.65), p=0.822  |
|                                          | Other                 | NA                           | 0.43 (-0.53, 1.40), p=0.384              | 0.23 (-0.66, 1.11), p=0.617  |
| Population                               | Medical               | Ref.                         | Ref.                                     | Ref.                         |

|                                |           |                              |                              |                              |
|--------------------------------|-----------|------------------------------|------------------------------|------------------------------|
|                                | MH        | 0.40 (-1.09, 1.90), p=0.573  | 0.18 (-0.87, 1.24), p=0.731  | 0.05 (-1.39, 1.51), p=0.939  |
| Inc. Medication Reconciliation | No        | Ref.                         | Ref.                         | Ref.                         |
|                                | Yes       | -0.81 (-1.64, 0.02), p=0.056 | -0.16 (-0.35, 0.40), p=0.891 | 0.24 (-0.37, 0.85), p=0.437  |
| <b>Sensitivity analysis</b>    |           |                              |                              |                              |
| Quality assessment             | Low (>6)  | Ref.                         | Ref.                         | Ref.                         |
|                                | High (≤6) | -0.01 (-0.75, 0.69), p=0.499 | 0.28 (-0.47, 0.87), p=0.689  | -0.79 (-1.49, 0.49), p=0.271 |

## Appendix 8: Sensitivity analysis

### 30-day readmissions

- Discharge process

Network Graph:

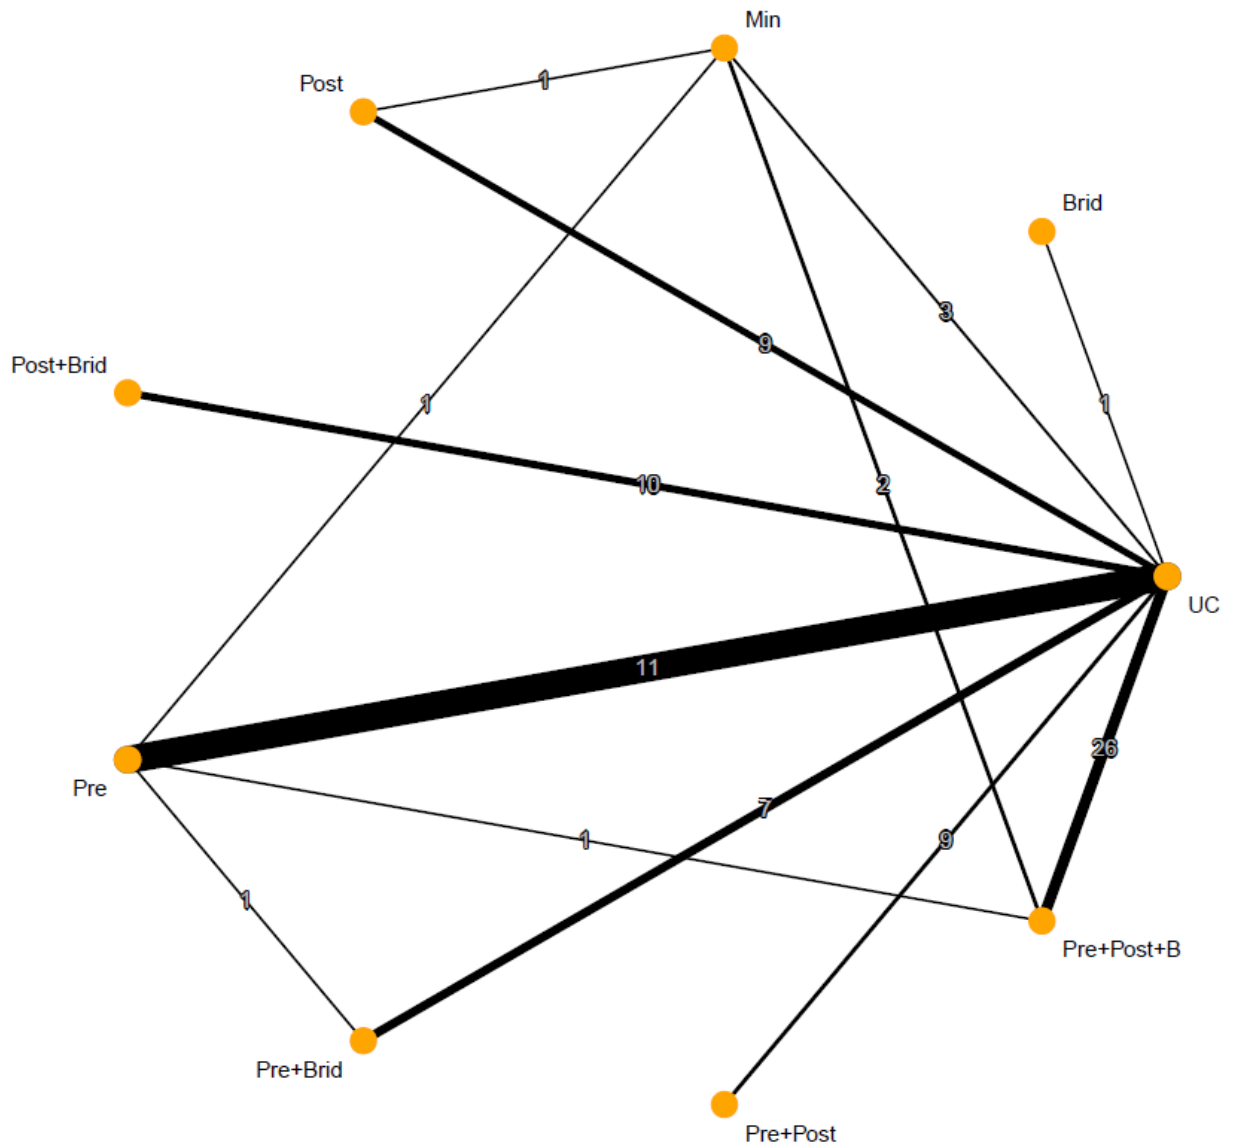

Network meta-analysis forest plot:

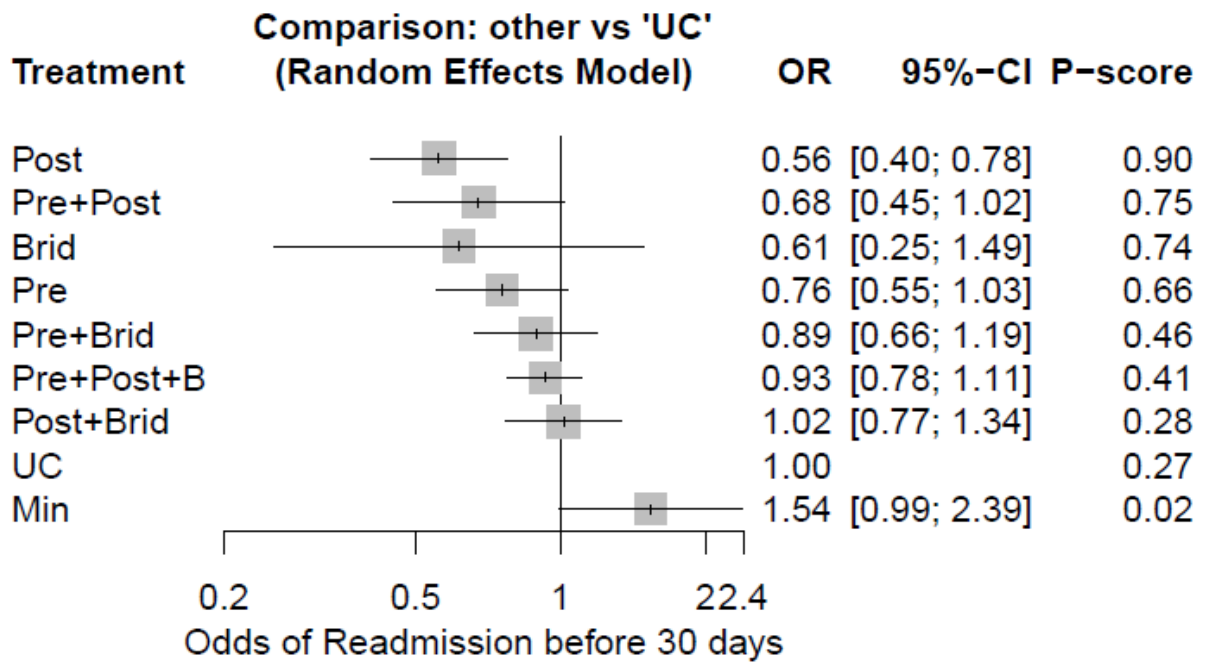

Heterogeneity:

$I^2 = 63.9\%$  [53.4%; 72.1%]

- Number of discharge stages

Network Graph:

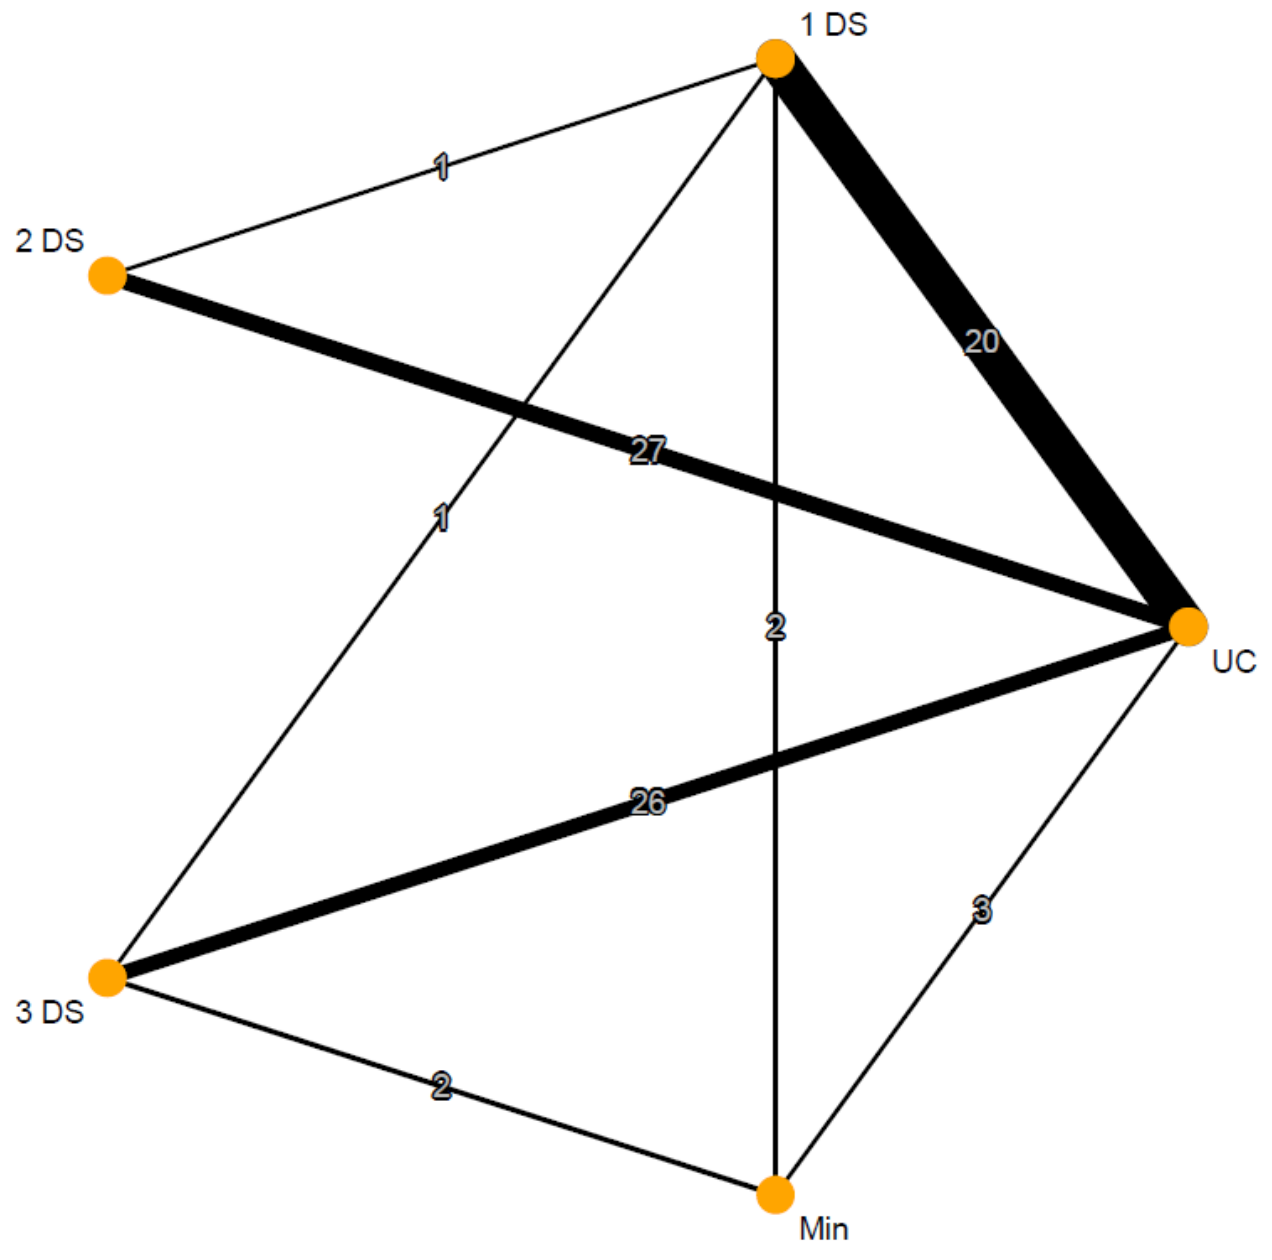

Network meta-analysis forest plot:

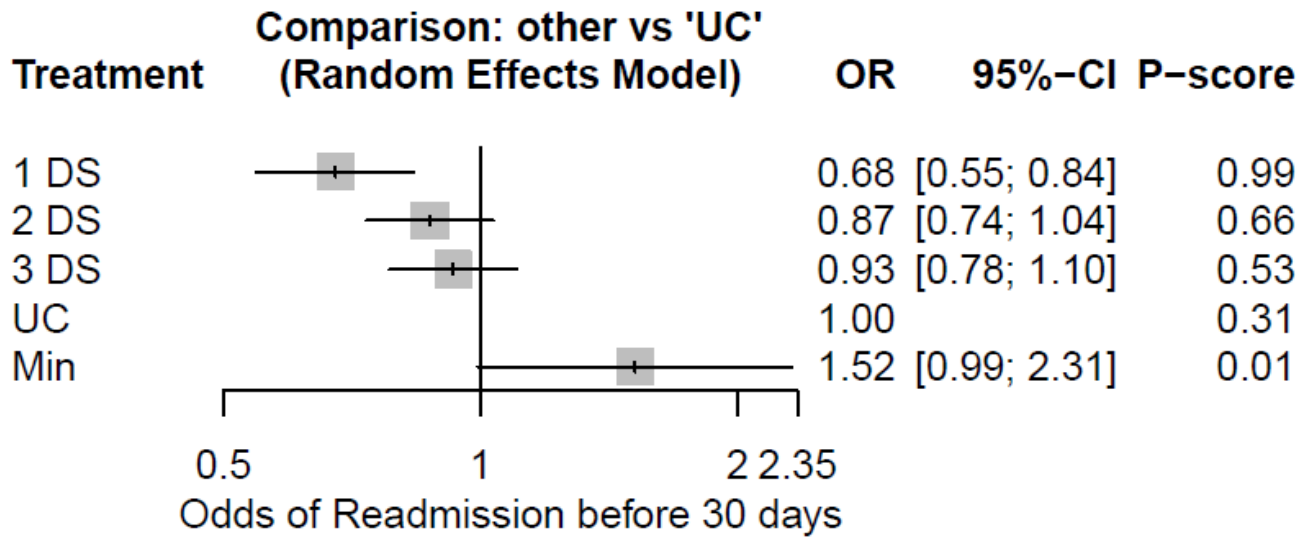

*Heterogeneity:*

$I^2 = 65.5\%$  [55.9%; 73.0%]

### 90-day readmission

- Discharge process



Network Graph:

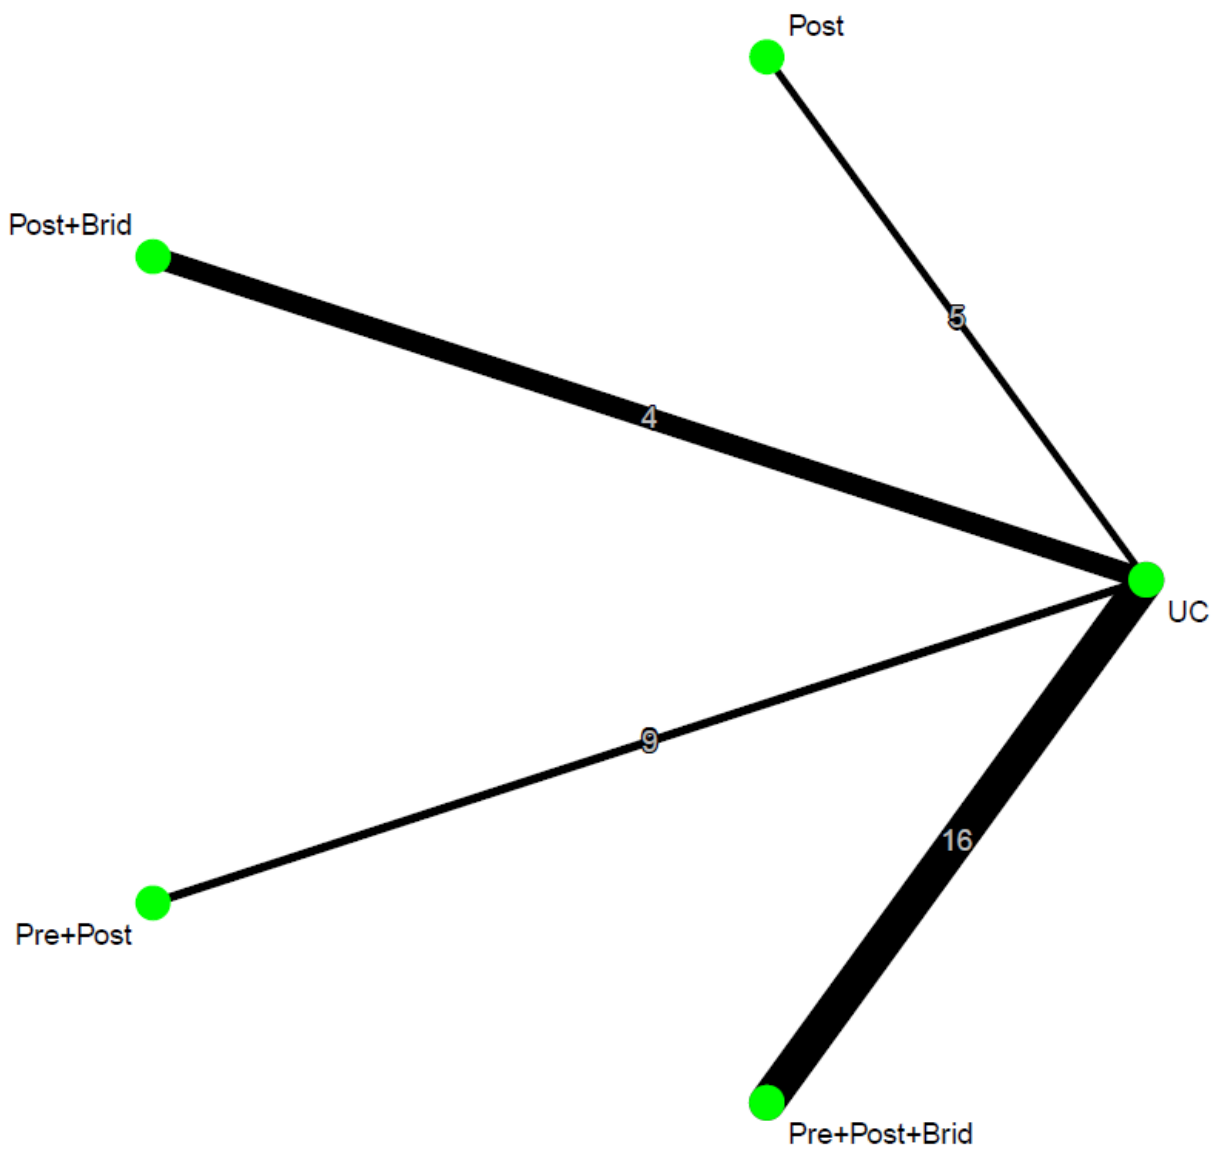

Network meta-analysis forest plot:

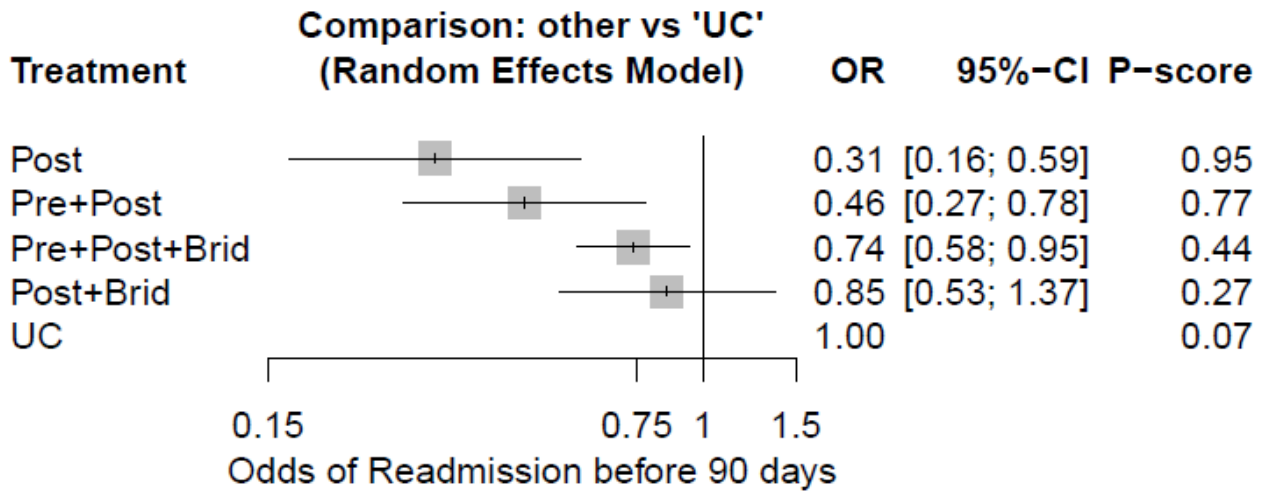

*Heterogeneity:*

$I^2 = 63.4\%$  [46.3%; 75.1%]

- Number of discharge stages

*Network Graph:*

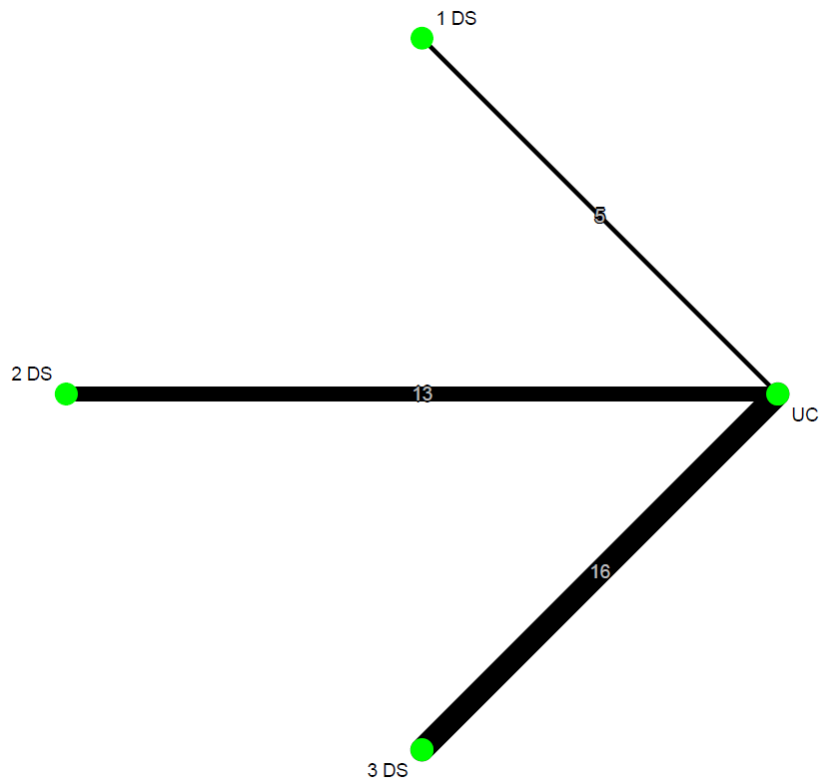

Network meta-analysis forest plot:

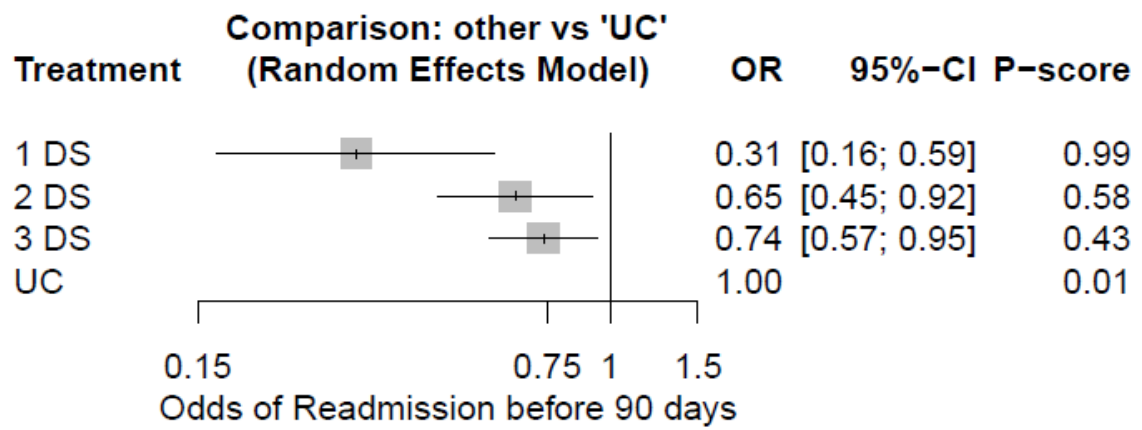

Heterogeneity:

$I^2 = 64.6\%$  [48.6%; 75.7%]

## Appendix 9: Readmissions and Secondary outcomes

### 30-day readmission

Network meta-analysis of 30-day readmissions with network graph and forest plot.

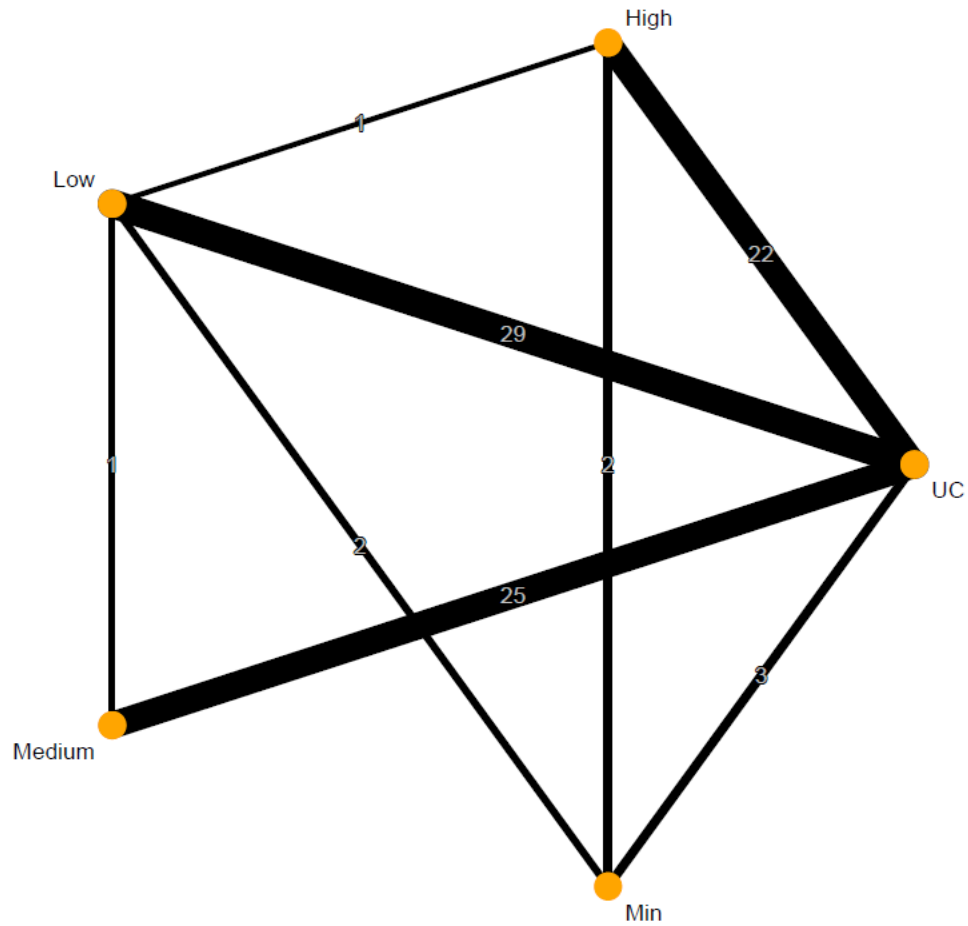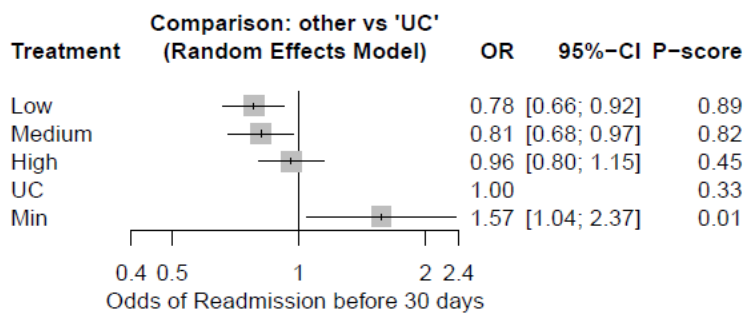

### 90-day readmission

Network meta-analysis of 90-day readmissions with network graph and forest plot.

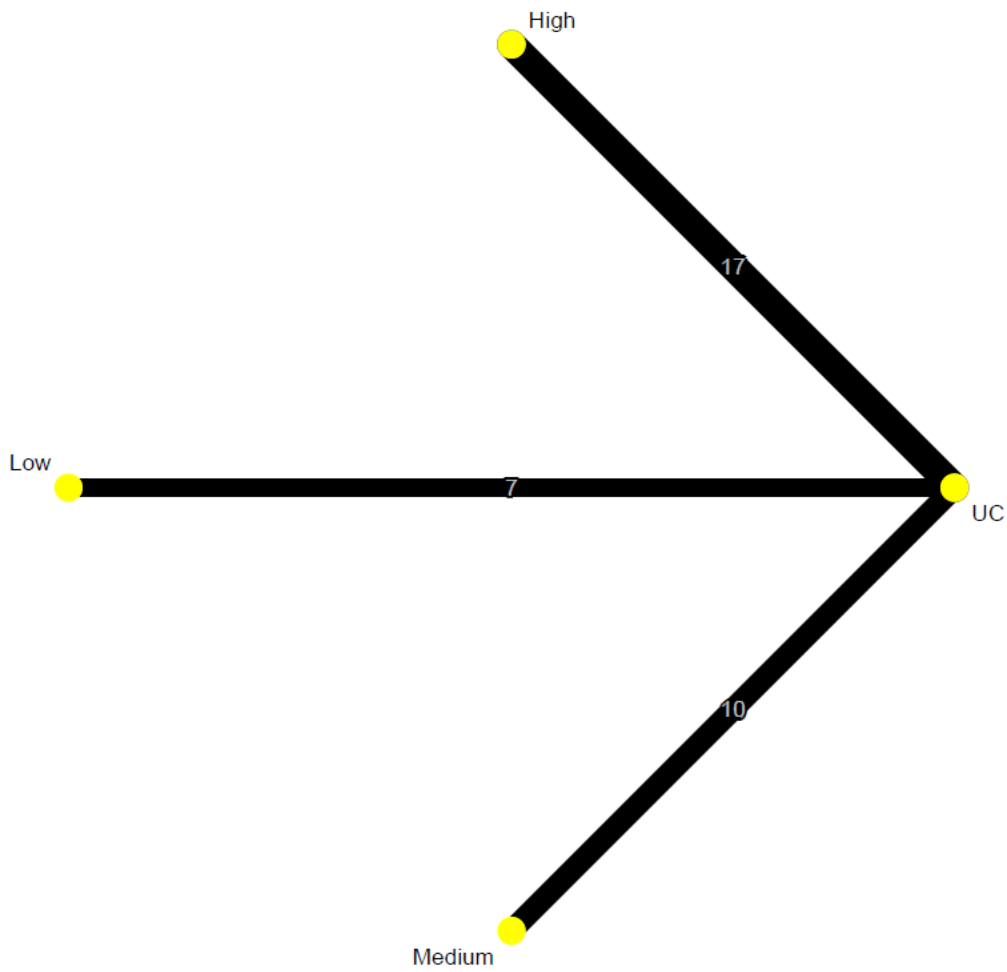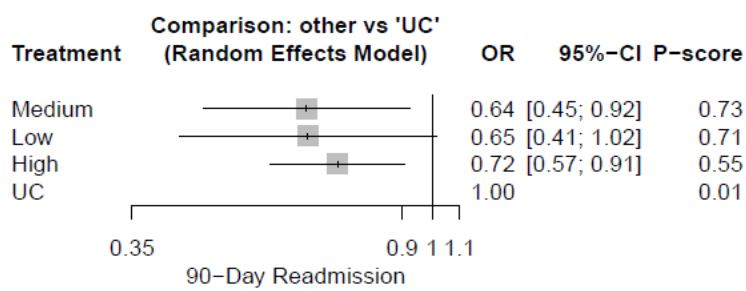

Pairwise meta-analysis of some secondary outcomes was done using Hartung-Knapp adjustment.

## 180-day readmission

Network meta-analysis of 180-day readmissions with network graph and forest plot.

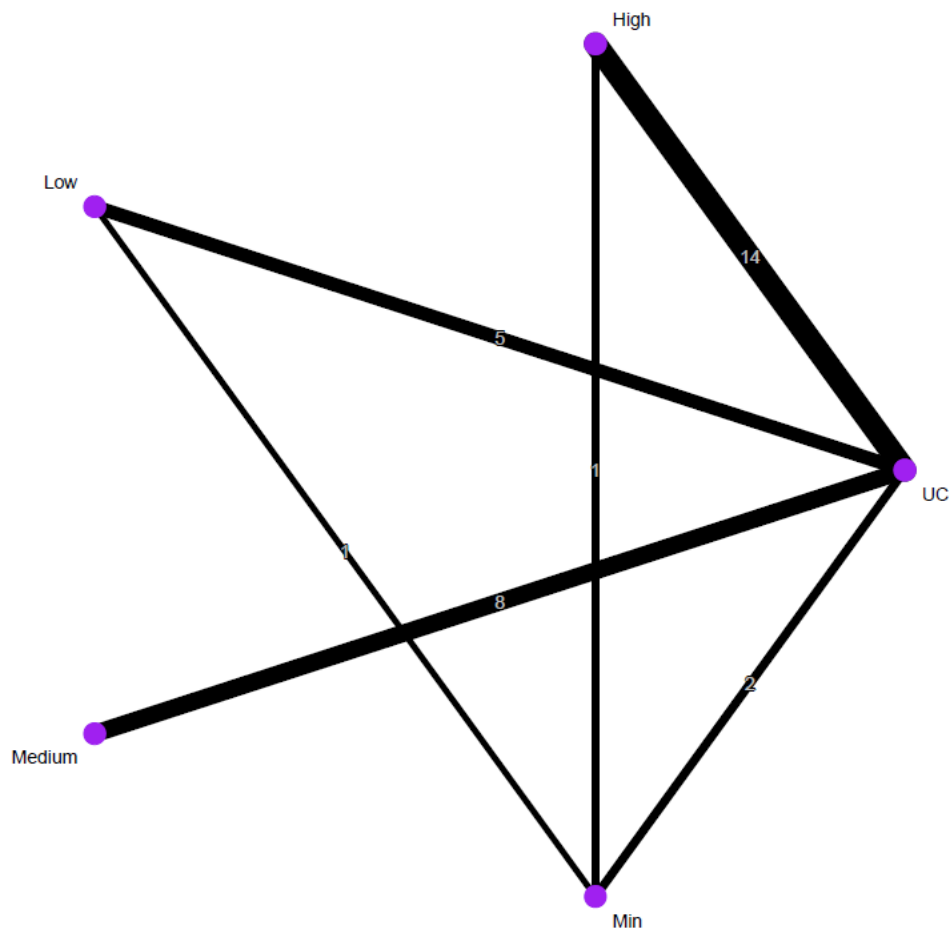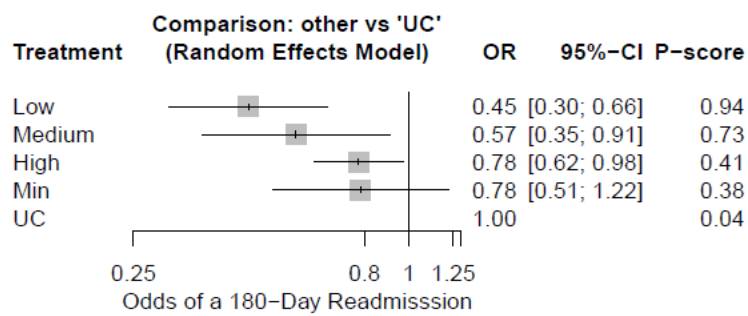

## Adverse events (Pairwise meta-analysis)

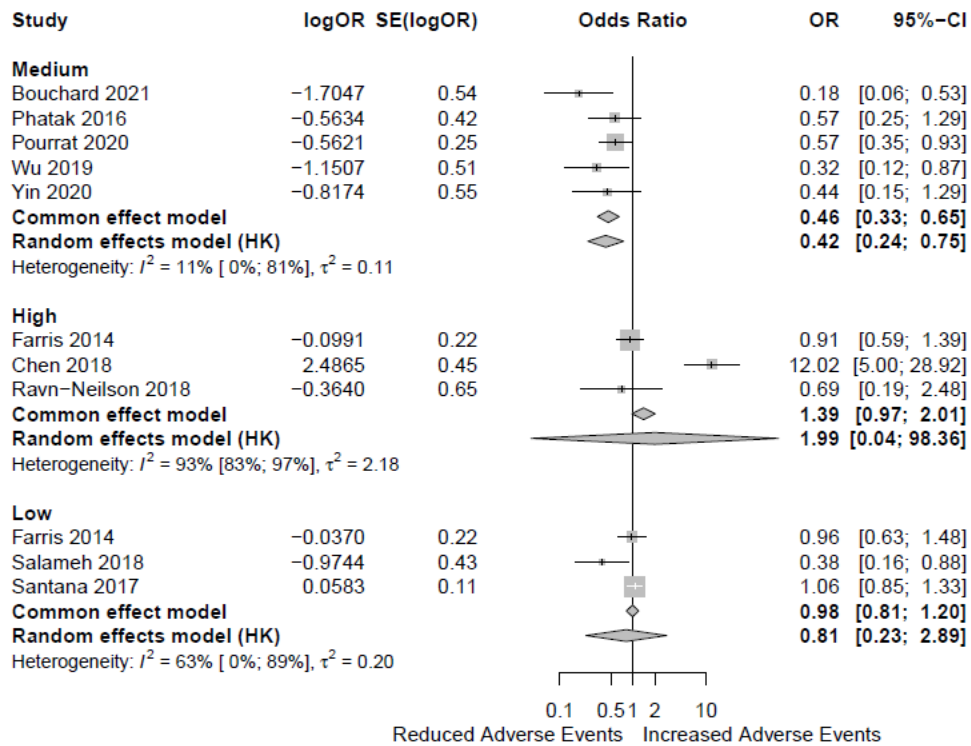

### Footnote:

TE: log odds ratio; seTE: standard error logs odds ratio; CI: confidence interval

### Medication Adherence (Pairwise meta-analysis)

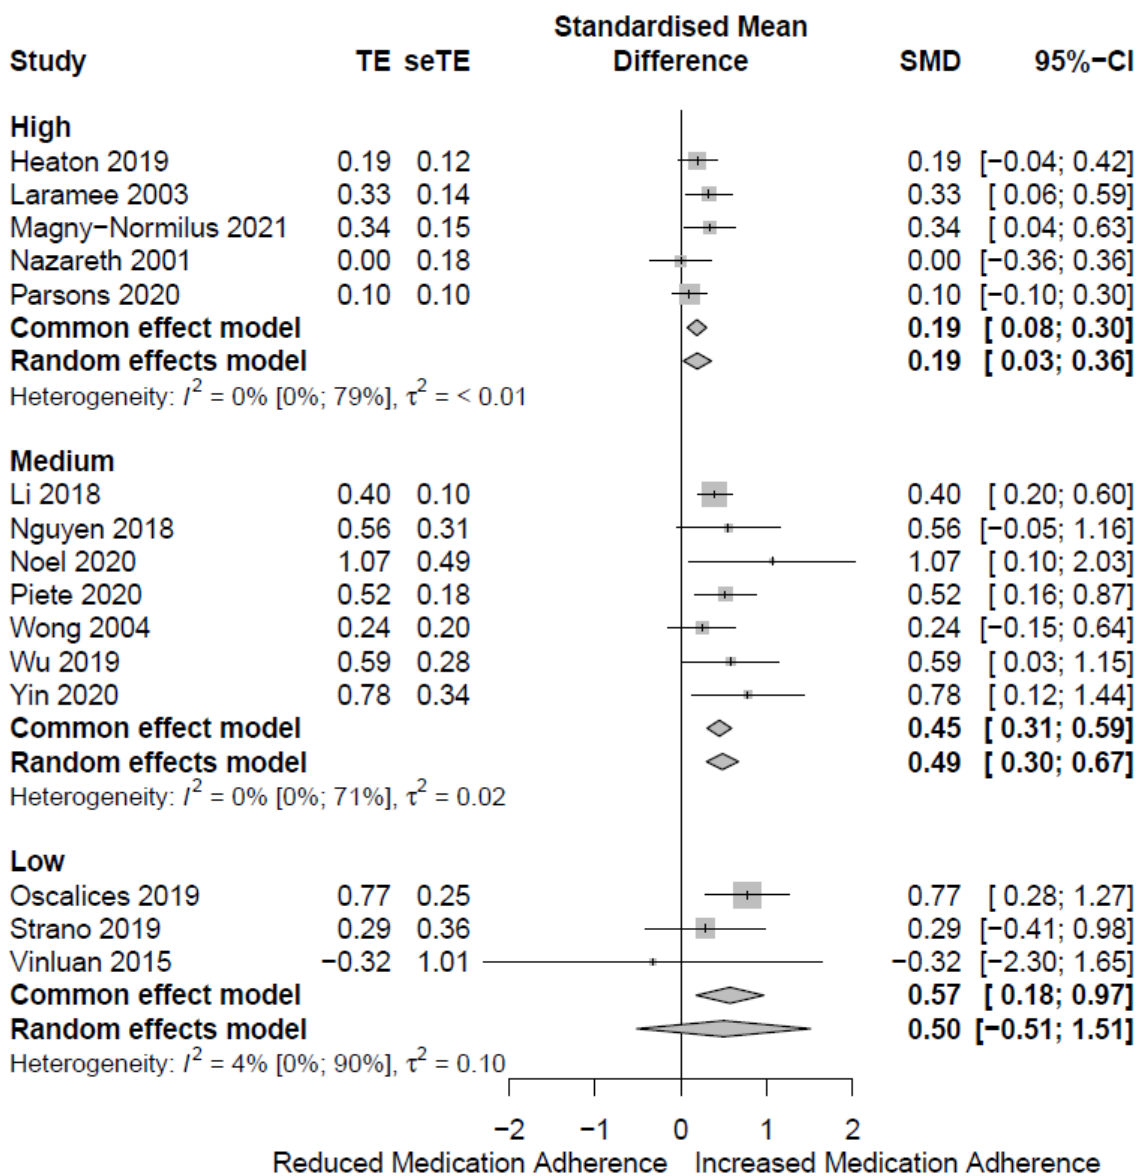



### Patient safety incidents (Pairwise meta-analysis)

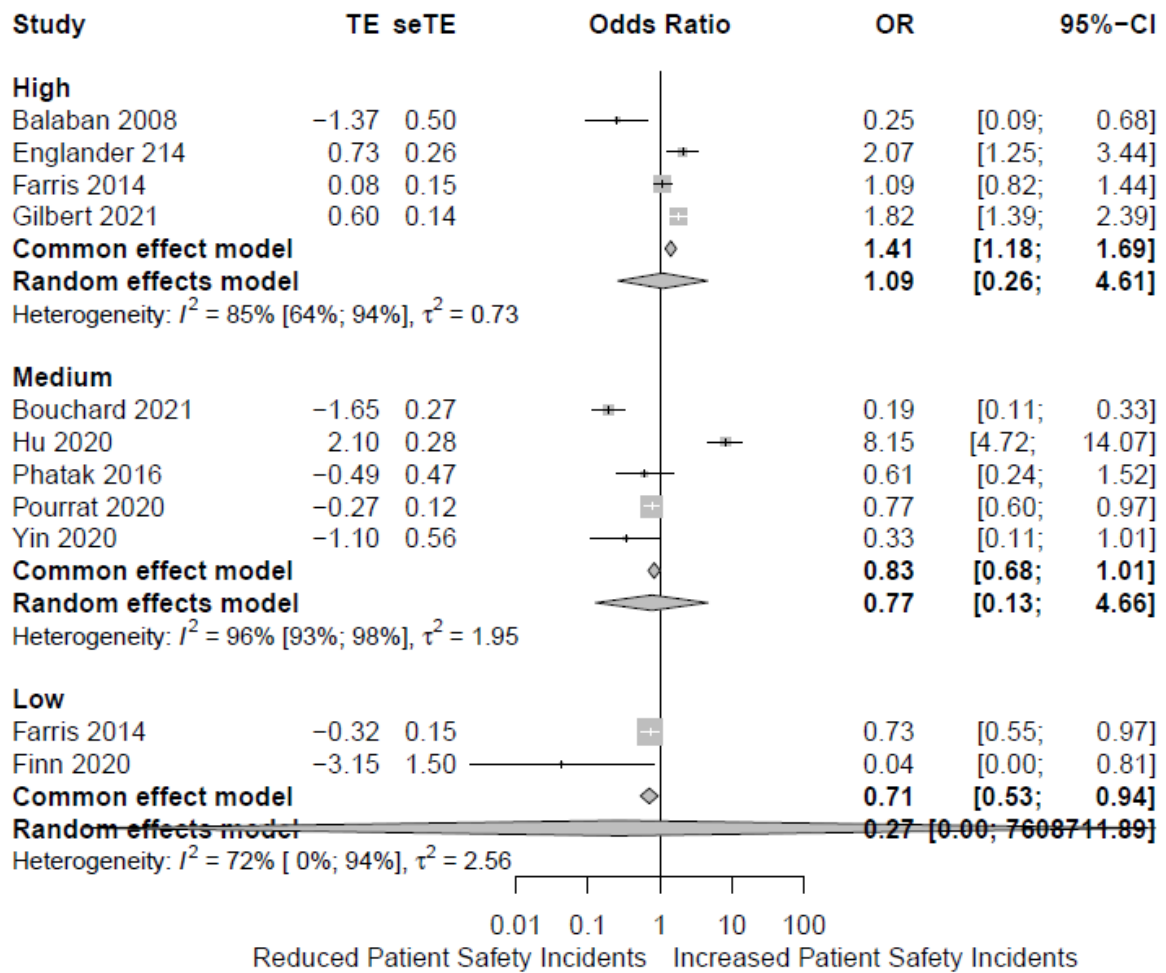

## ED visit

Network meta-analysis of ED visit with network graph and forest plot.

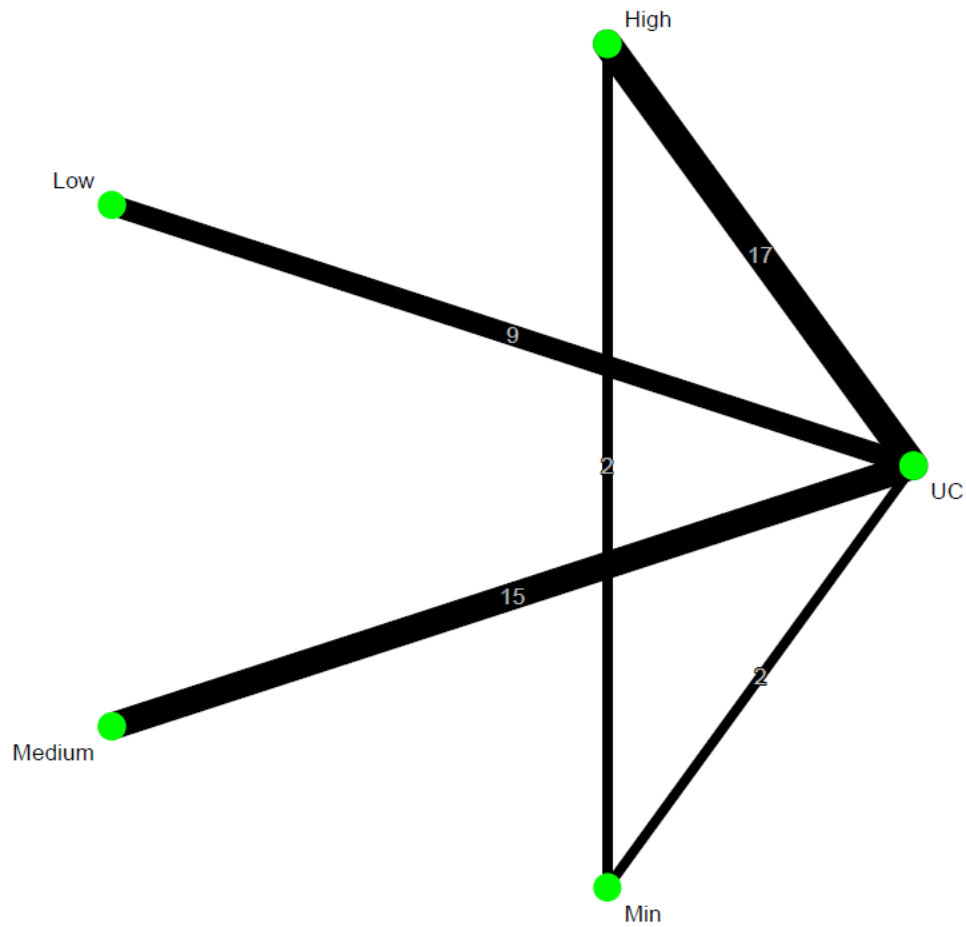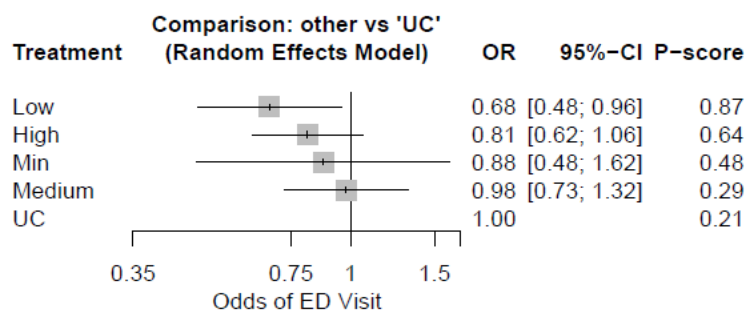

### Length of stay (Pairwise meta-analysis)

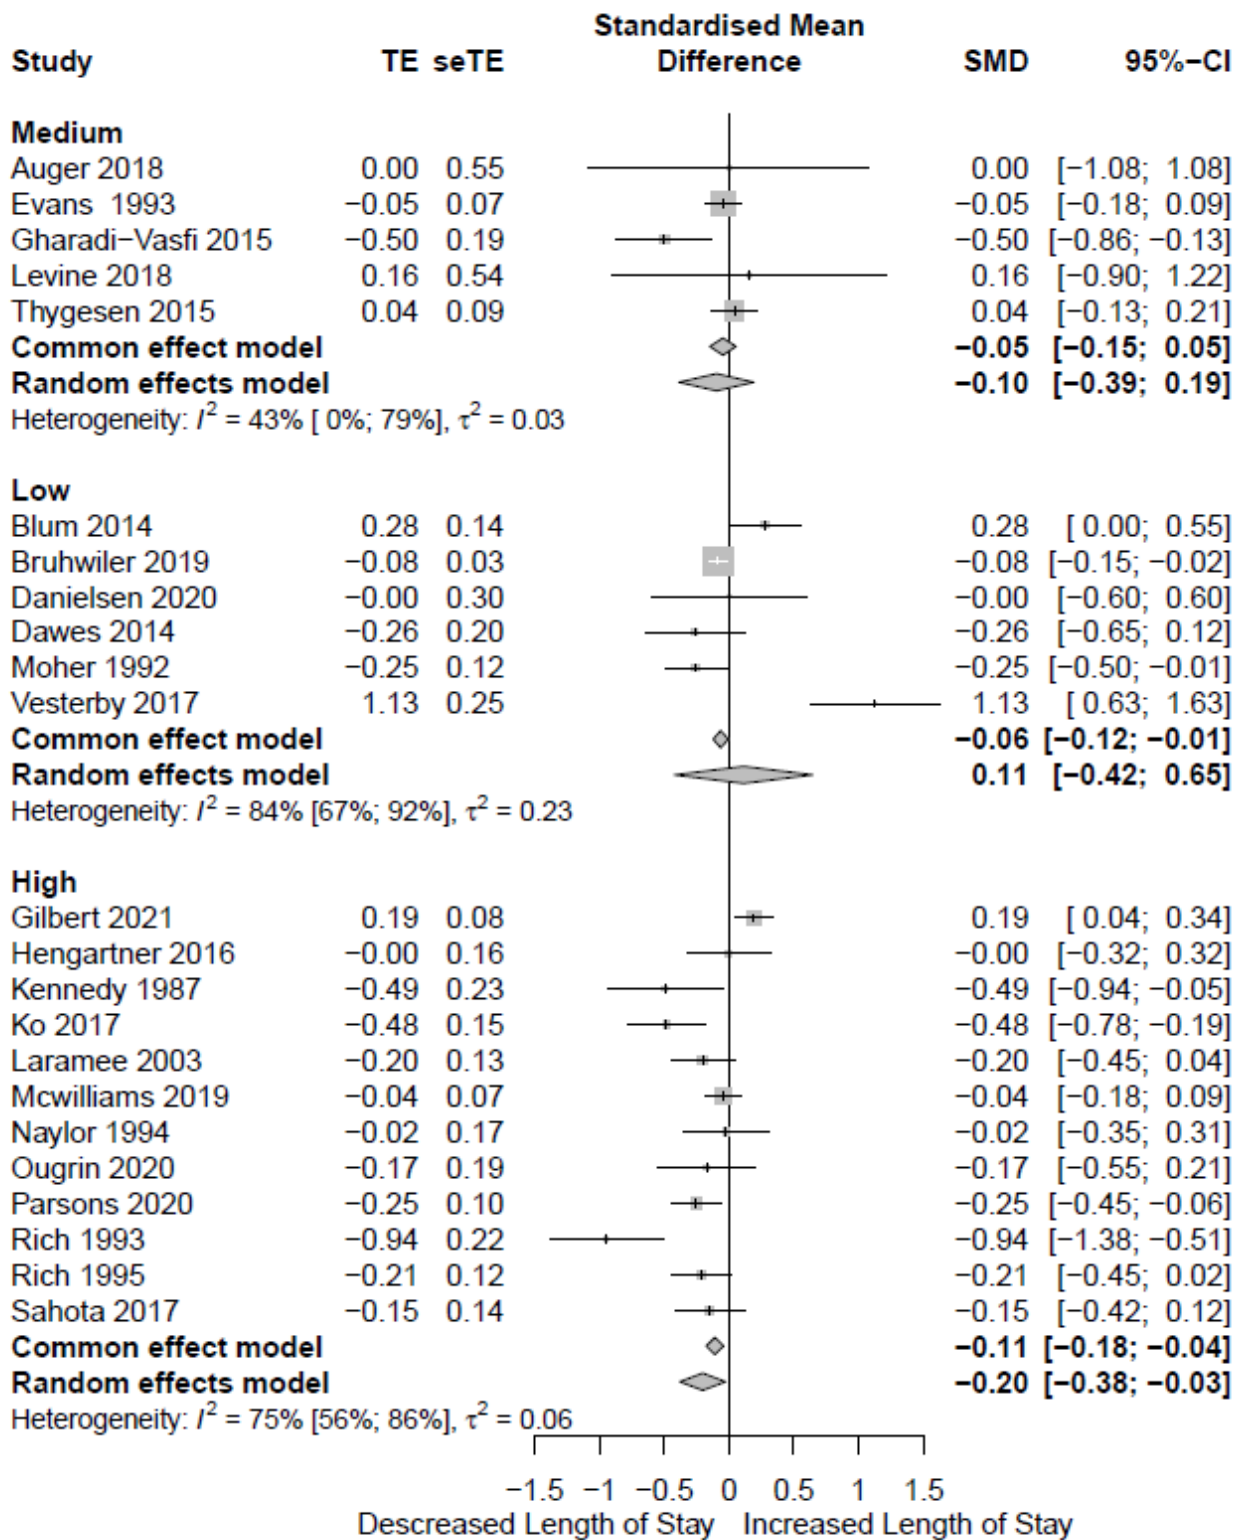

### Mortality (Network meta-analysis)

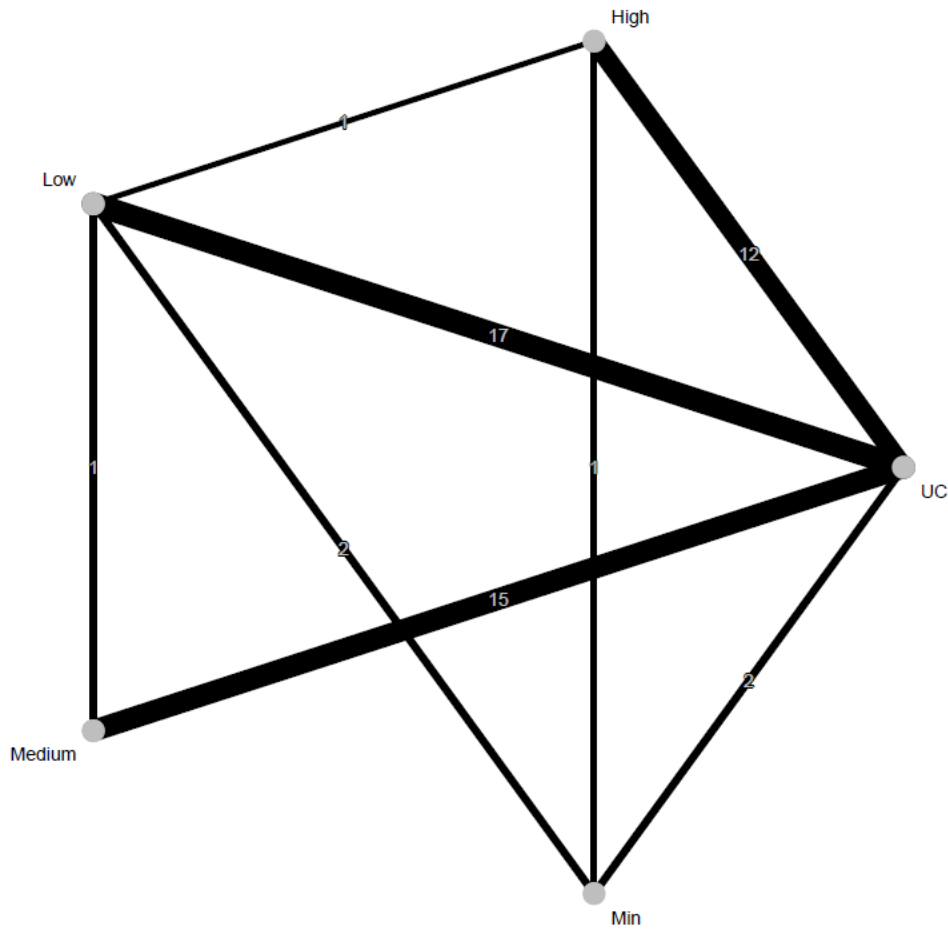

| Treatment | Comparison: other vs 'UC'<br>(Random Effects Model) | OR   | 95%-CI       | P-score |
|-----------|-----------------------------------------------------|------|--------------|---------|
| Min       |                                                     | 0.74 | [0.55; 1.00] | 0.90    |
| Medium    |                                                     | 0.84 | [0.69; 1.03] | 0.69    |
| Low       |                                                     | 0.90 | [0.78; 1.03] | 0.54    |
| High      |                                                     | 0.97 | [0.87; 1.09] | 0.25    |
| UC        |                                                     | 1.00 |              | 0.12    |

Odds of a Mortality

## General QoL (Pairwise meta-analysis)

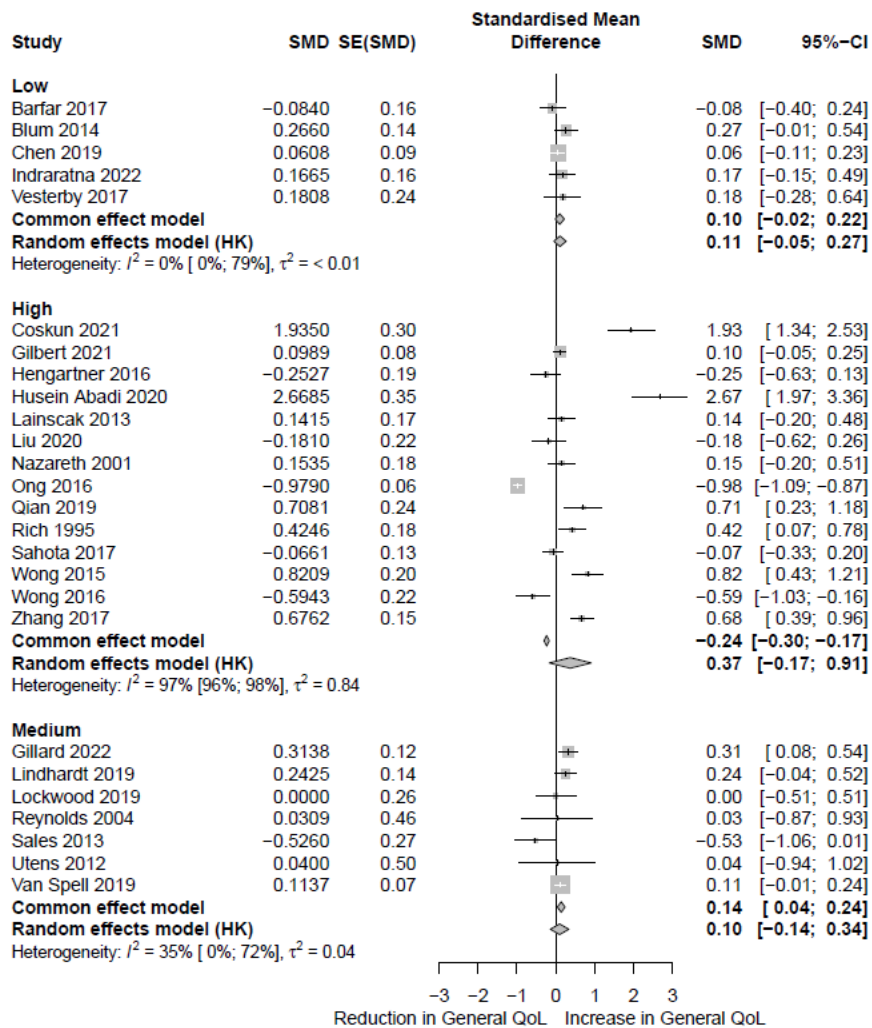

### Mental QoL (Pairwise meta-analysis)

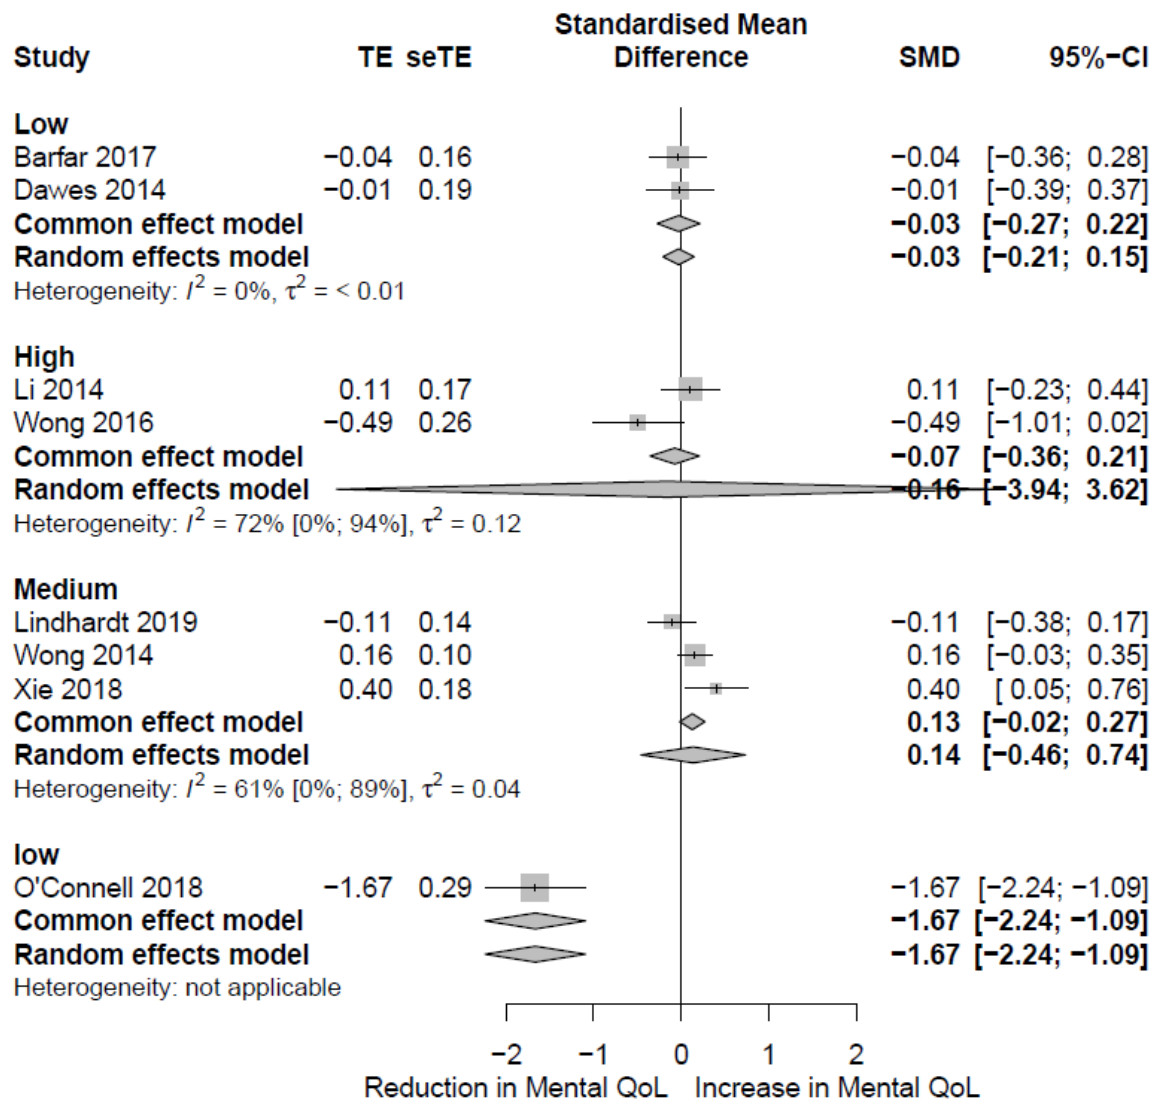

### Physical QoL (Pairwise meta-analysis)

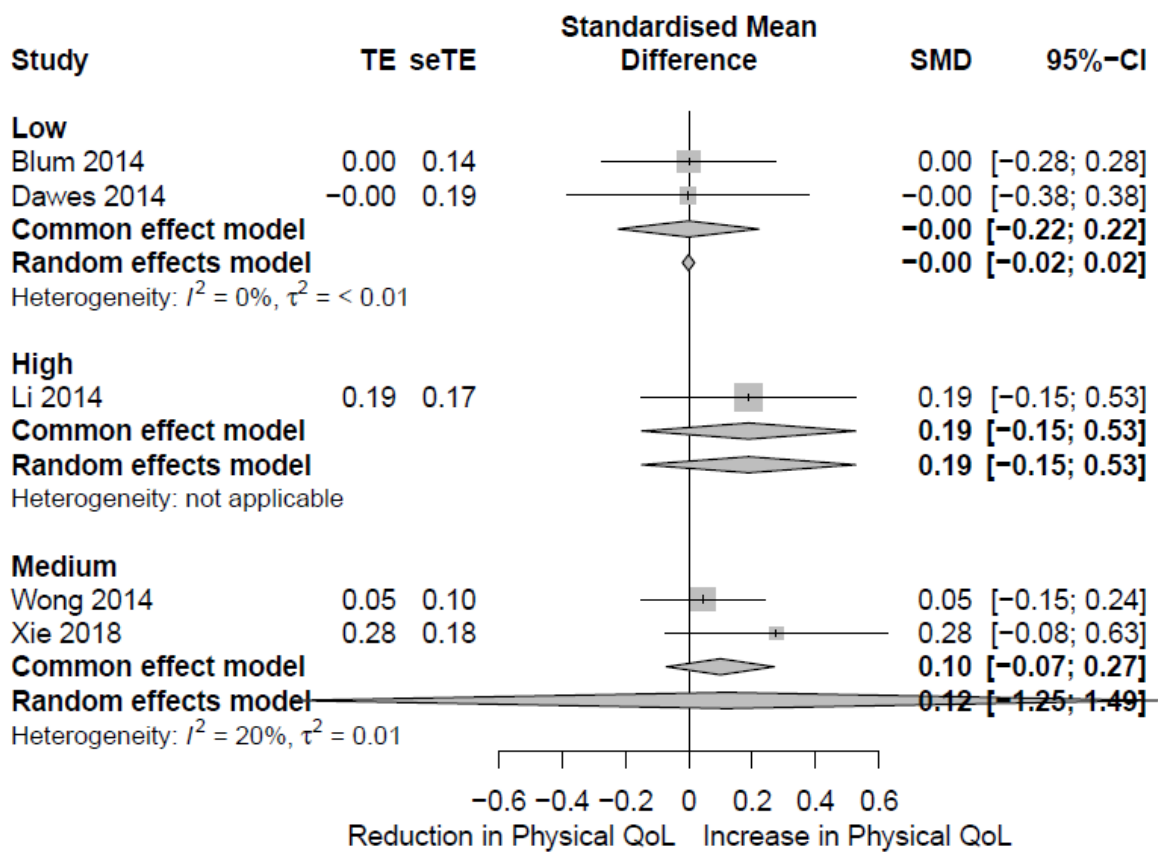

## Patient satisfaction (Pairwise meta-analysis)

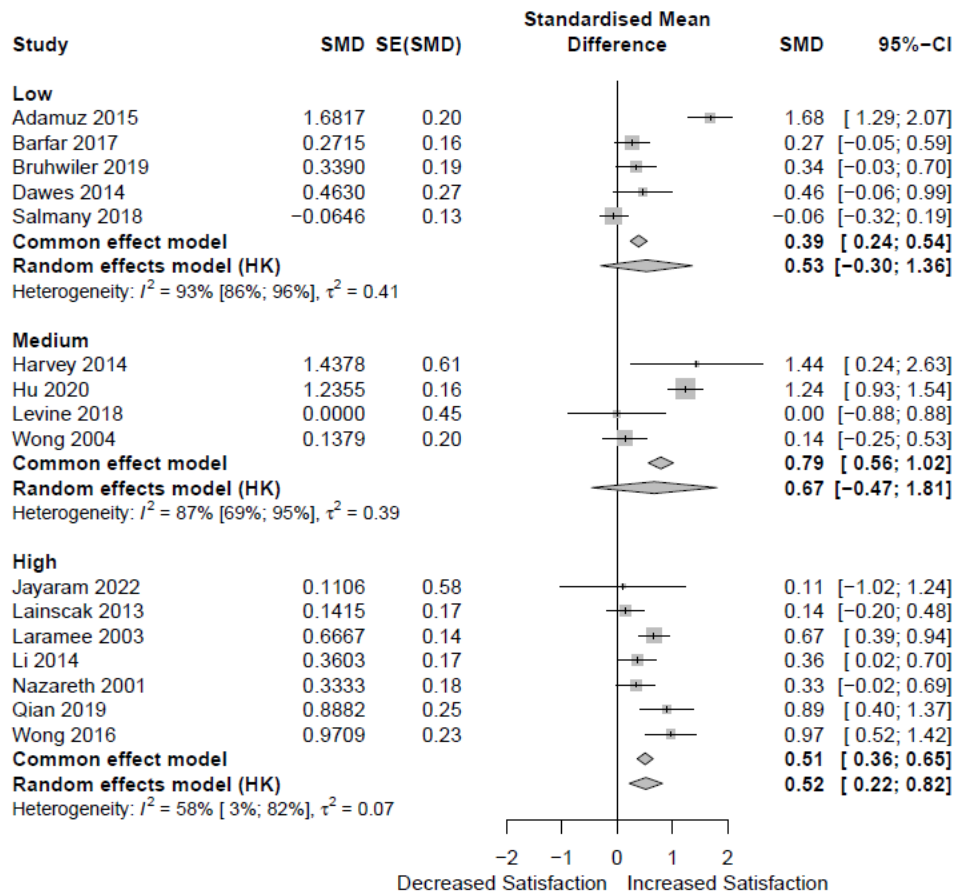



## Intervention Uptake (Network meta-analysis)

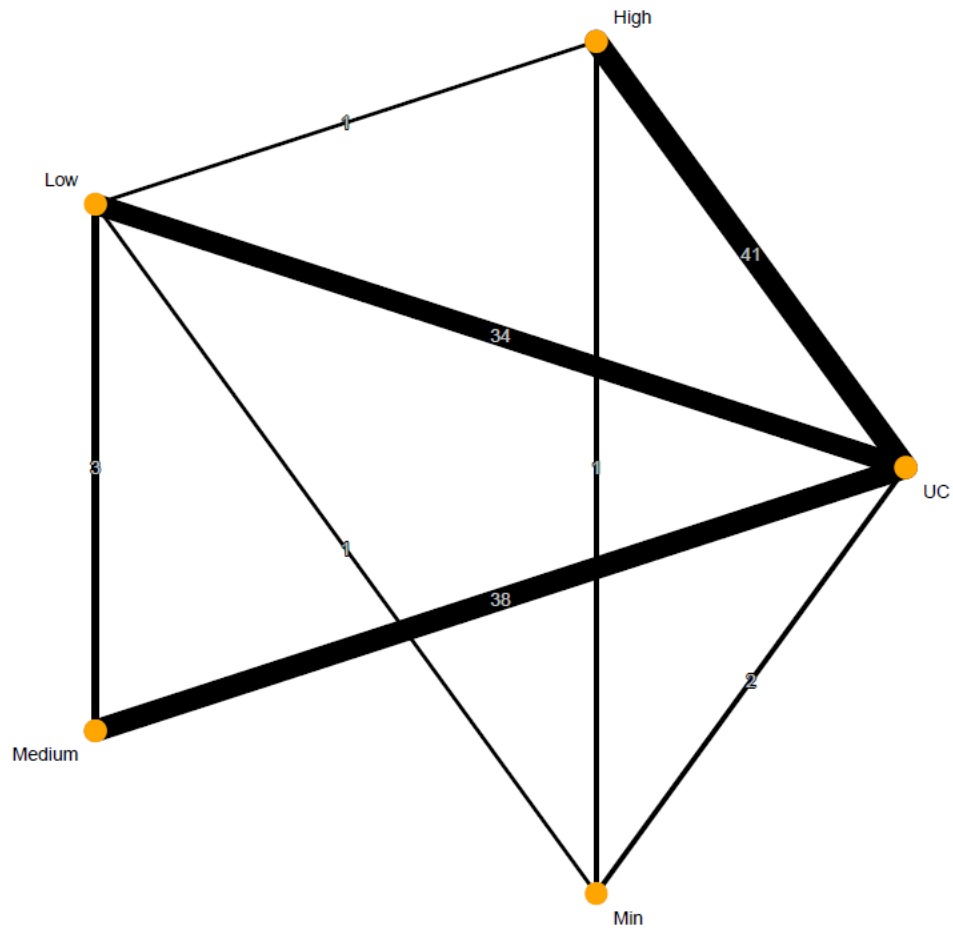

| Treatment | Comparison: other vs 'UC'<br>(Random Effects Model) | OR   | 95%-CI       | P-score |
|-----------|-----------------------------------------------------|------|--------------|---------|
| Low       |                                                     | 0.90 | [0.70; 1.15] | 0.75    |
| High      |                                                     | 0.92 | [0.74; 1.14] | 0.70    |
| Medium    |                                                     | 0.97 | [0.77; 1.21] | 0.56    |
| UC        |                                                     | 1.00 |              | 0.43    |
| Min       |                                                     | 1.87 | [0.81; 4.31] | 0.06    |

0.65 0.75 1 1.5  
Odds of Intervention Uptake
