# Supplementary material for: Transitional Care Interventions From Hospital to Community to Reduce Health Care Use and Improve Patient Outcomes: A Systematic Review and Network Meta-Analysis
Source: PubMed Central journal article supplement (PMC10690480; doi:10.1001/jamanetworkopen.2023.44825), 2023-11-30
Supplement: jamanetwopen-e2344825-s002.pdf [file jamanetwopen-e2344825-s002.pdf]

## Data Sharing Statement

Tyler. Transitional Care Interventions From Hospital to Community to Reduce Health Care Use and Improve Patient Outcomes. *JAMA Netw Open*. Published November 30, 2023.

doi:10.1001/jamanetworkopen.2023.44825

### Data

**Data available:** Yes

**Data types:** Study level aggregate data

**How to access data:** [natasha.tyler@manchester.ac.uk](mailto:natasha.tyler@manchester.ac.uk)

**When available:** With publication

### Supporting Documents

**Document types:** None

### Additional Information

**Who can access the data:** anyone requesting the data

**Types of analyses:** any purpose

**Mechanisms of data availability:** with investigator support
